# Supplementary material for: Visible light-driven direct access to imine-containing azaarene-substituted highly functionalized pyrroles
Source: Royal Society of Chemistry journal article supplement (doi:10.1039/d3qo01056b), 2023-01-01

# Supporting Information

## Visible light-driven direct access to imine-containing azaarene-substituted highly functionalized pyrroles

Shuai Yao,<sup>a</sup> Xiaowei Zhao,<sup>a</sup> Xu Ban,<sup>b</sup> Tianju Shao,<sup>b</sup> Yanli Yin,<sup>b</sup>

Weigao Hu,<sup>\*c</sup> and Zhiyong Jiang<sup>\*ab</sup>

<sup>a</sup>*International Scientific and Technological Cooperation Base of Chiral Chemistry, Henan University, Kaifeng, Henan, P. R. China 475004.*

<sup>b</sup>*School of Chemistry and Chemical Engineering, Henan Normal University, Xinxiang, Henan, P. R. China 453007*

<sup>c</sup>*Marine Biomedical Research Institute, Guangdong Medical University, Zhanjiang, Guangdong, P. R. China 524023*

E-mail: weigaohu@gdmu.edu.cn; chmjzy@henu.edu.cn;

## Table of Contents

|                                              |                |
|----------------------------------------------|----------------|
| 1. General information                       | <b>S3-S4</b>   |
| 2. General procedures                        | <b>S5</b>      |
| 3. Gram-scale synthesis                      | <b>S6</b>      |
| 4. <i>E/Z</i> isomerization experiments.     | <b>S6</b>      |
| 5. Asymmetric experiments                    | <b>S7</b>      |
| 6. UV/Vis absorption and NMR studies         | <b>S8-S12</b>  |
| 7. Emission quenching experiments            | <b>S13</b>     |
| 8. Cyclic voltammetry measurement            | <b>S14-S15</b> |
| 9. Other experiments for exploring mechanism | <b>S16</b>     |
| 10. X-Ray crystallographic data              | <b>S17-S22</b> |
| 11. References                               | <b>S23</b>     |
| 12. Characterization data                    | <b>S24-S36</b> |
| 13. Copies of NMR spectra                    | <b>S37-S94</b> |

## 1. General information

### General procedures and methods

Experiments involving moisture and/or air sensitive components were performed under a positive pressure of argon in oven-dried glassware equipped with a rubber septum inlet. Dried solvents and liquid reagents were transferred by oven-dried syringes or hypodermic syringe cooled to ambient temperature in a desiccator. Reaction mixtures were stirred in 25 mL Schlenk tube with Teflon-coated magnetic stirring bars unless otherwise stated. Moisture in non-volatile reagents/compounds was removed in high *vacuo* by means of an oil pump and subsequent purging with nitrogen. Solvents were removed *in vacuo* under ~30 mmHg and heated with a water bath at 30–35 °C using rotary evaporator with aspirator. The condenser was cooled with running water at 0 °C.

All experiments were monitored by analytical thin layer chromatography (TLC). TLC was performed on pre-coated plates, 60 F<sub>254</sub>. After elution, plate was visualized under UV illumination at 254 nm for UV active material. Further visualization was achieved by staining Ce(SO<sub>4</sub>)<sub>2</sub> solution. For those using the aqueous stains, the TLC plates were heated on a hot plate.

Columns for flash chromatography (FC) contained *silica gel* 200–300 mesh. Columns were packed as slurry of *silica gel* in petroleum ether and equilibrated solution using the appropriate solvent system. The elution was assisted by applying pressure of about 2 atm with an air pump.

### Instrumentations

Proton nuclear magnetic resonance (<sup>1</sup>H NMR) and carbon NMR (<sup>13</sup>C NMR) were recorded in CDCl<sub>3</sub> otherwise stated. Chemical shifts are reported in parts per million (ppm), using the residual solvent signal as an internal standard: CDCl<sub>3</sub> (<sup>1</sup>H NMR: δ 7.26, singlet; <sup>13</sup>C NMR: δ 77.0, triplet). Multiplicities were given as: *s* (singlet), *d* (doublet), *t* (triplet), *q* (quartet), *quintet*, *m* (multiplets), *dd* (doublet of doublets), *dt* (doublet of triplets), and *br* (broad). Coupling constants (*J*) were recorded in hertz (Hz). The number of proton atoms (*n*) for a given resonance was indicated by *n*H. The number of carbon atoms (*n*) for a given resonance was indicated by *n*C. HRMS (Analyzer: TOF) was reported in units of mass of charge ratio (*m/z*). Mass samples were dissolved in CH<sub>3</sub>CN (HPLC Grade) unless otherwise stated. Melting points were determined on a melting point apparatus.

### Materials

All commercial reagents were purchased with the highest purity grade. They were used without further purification unless specified. All solvents used, mainly petroleum ether (PE) and ethyl acetate (EtOAc) were distilled. Anhydrous dichloromethane (DCM), DCE, CH<sub>3</sub>COCH<sub>3</sub>, CH<sub>3</sub>CN, DMSO were freshly distilled from CaH<sub>2</sub> and stored under N<sub>2</sub> atmosphere. THF, CHCl<sub>3</sub> and toluene were freshly distilled from sodium/benzophenone

before use. All compounds synthesized were stored in a  $-20\text{ }^{\circ}\text{C}$  freezer and light-sensitive compounds were protected with aluminium foil.

## 2. General procedures

### 2.1 Preparation of starting materials

1,2-Diphenyl-3-(pyridin-2-yl)prop-2-en-1-one and other corresponding  $\alpha,\beta$ -unsaturated ketone derivatives were prepared based on the reported procedures.<sup>1</sup>

**Representative procedure:** A solution of 1,2-diphenylethan-1-one (1.96 g, 10 mmol), picolinaldehyde (1.06 g, 10 mmol), AcOH (0.5 mL) and piperidine (0.2 mL) in 25 mL toluene was refluxed overnight using a Dean-stark apparatus. After cooling to room temperature, the reaction was quenched by the addition of saturated aqueous NaHCO<sub>3</sub> solution (10 mL). The aqueous layer was extracted with ethyl acetate (3 × 30 mL) and the combined organic layer was dried over anhydrous Na<sub>2</sub>SO<sub>4</sub>, filtered and concentrated under reduced pressure. The solvent was removed under vacuum and the resultant residue was purified by flash chromatography on *silica gel* (ethyl acetate/petroleum ether, 1:10 v/v) to afford the (*Z/E*)-1,2-Diphenyl-3-(pyridin-2-yl)prop-2-en-1-one in 80% yield.

### 2.2 General procedures for the synthesis of azaarene-substituted pyrroles

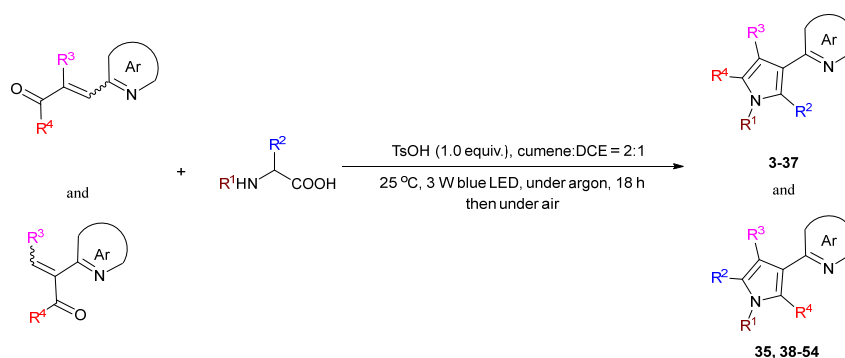

$\beta$ -Azaarene-substituted enones or  $\alpha$ -azaarene-substituted enones (0.1 mmol, 1.0 equiv.) and *N*-aryl amino acids (0.15 mmol, 1.5 equiv.) with TsOH (0.1 mmol, 1.0 equiv.) in cumene/DCE (v/v = 2:1, 4.5 mL) was added into a 10 mL Schlenk tube, degassed three times by freeze-pump-thaw method. The reaction mixture was stirred under an argon atmosphere at 25 °C (the temperature was maintained in an incubator) and irradiated by a 3 W blue LED ( $\lambda_{\text{max}} = 452 \text{ nm}$ ) for 18 h. After completion, the reaction mixture was removing the solvent and purification by a short *silica gel* column, followed by gradient elution with petroleum ether/ethyl acetate (100/1–10/1 ratio). Removing the solvent *in vacuo*, afforded products **3-54**.

### 2.3 Unsuccessful substrates

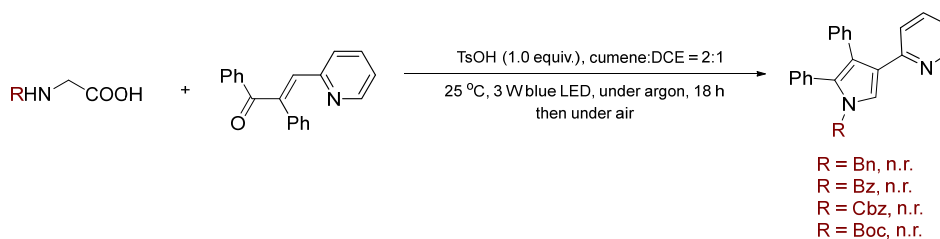

### 3. Gram-scale synthesis

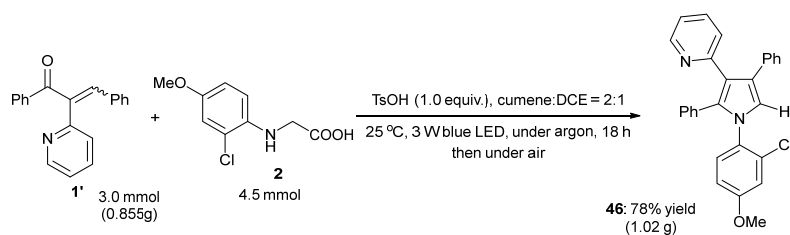

**1'** (3 mmol, 1.0 equiv.) and **2** (4.5 mmol, 1.5 equiv.) with TsOH (3 mmol, 1.0 equiv.) in cumene/DCE (v/v = 2: 1, 120 mL) was added into a 300 mL Schlenk tube, degassed three times by freeze-pump-thaw method. The reaction mixture was stirred under an argon atmosphere at 25 °C (the temperature was maintained in an incubator) and irradiated by a 3 W blue LED ( $\lambda_{\text{max}} = 452 \text{ nm}$ ) for 18 h. After completion of the reaction, the reaction mixture was removing the solvent and purification by a short *silica gel* column, followed by gradient elution with petroleum ether/ethyl acetate (100/1–10/1 ratio). Removing the solvent *in vacuo*, afforded product **46** as a gray solid in 78% yield (1.02 g).

### 4. *E/Z* Isomerization experiments.

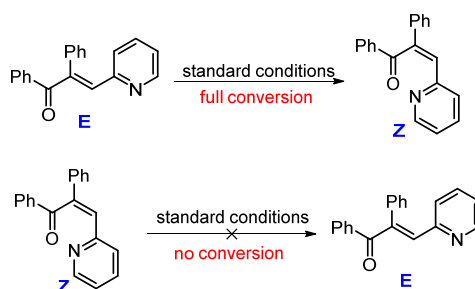

## 5. Asymmetric experiments

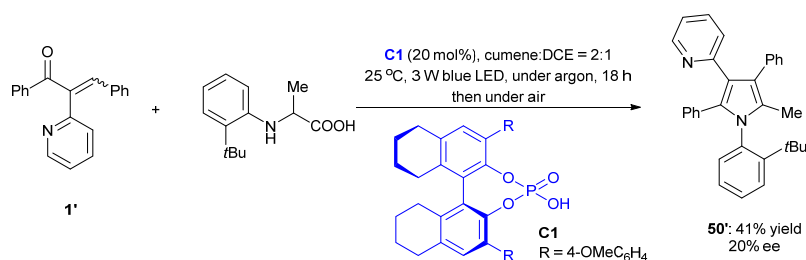

**1'** (0.1 mmol, 1.0 equiv.) and (2-*tert*-butyl)phenylalanine (0.15 mmol, 1.5 equiv.) with **C1** (0.02 mmol, 0.2 equiv.) in cumene/DCE (v/v = 2:1, 4.5 mL) was added into a 10 mL Schlenk tube, degassed three times by freeze-pump-thaw method. The reaction mixture was stirred under an argon atmosphere at 25 °C (the temperature was maintained in an incubator) and irradiated by a 3 W blue LED ( $\lambda_{\text{max}} = 452 \text{ nm}$ ) for 18 h. After completion of the reaction, the reaction mixture was removing the solvent and purification by a short *silica gel* column, followed by gradient elution with petroleum ether/ethyl acetate (100/1–10/1 ratio). Removing the solvent *in vacuo*, afforded products **50'** as a gray solid in 41% yield (18.1 mg) and 20% ee.

The ee was determined by HPLC analysis: CHIRALPAK IG (4.6 mm i.d. x 250 mm); hexane/2-propanol = 90/10; flow rate 1.0 mL/min; 25 °C; 254 nm; retention time: 10.2 min (major) and 12.2 min (minor).

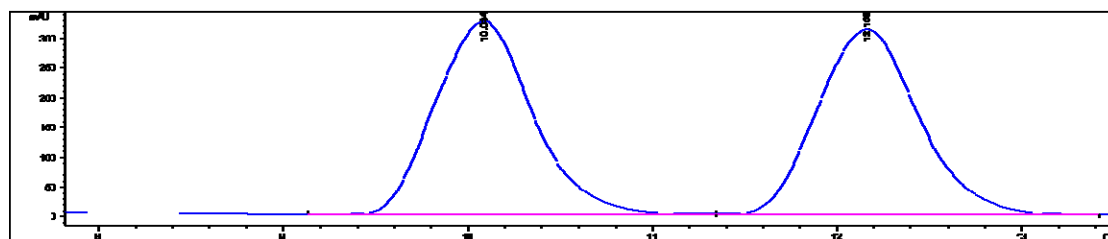

| Entry | Retention Time | %Area  | Area    | Height |
|-------|----------------|--------|---------|--------|
| 1     | 10.048         | 50.261 | 12068.6 | 325.6  |
| 2     | 12.272         | 49.739 | 11943.4 | 311.8  |

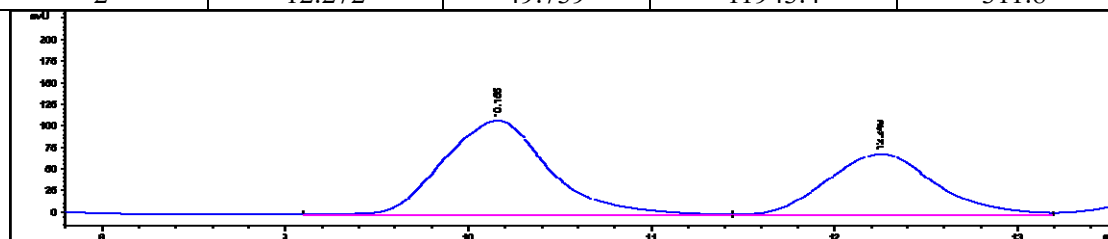

| Entry | Retention Time | %Area  | Area   | Height |
|-------|----------------|--------|--------|--------|
| 1     | 10.155         | 60.104 | 4517.6 | 109.7  |
| 2     | 12.249         | 39.896 | 2998.7 | 71.5   |

## 6. UV/Vis absorption and NMR studies

### 6.1 UV-vis absorption spectra

UV-vis absorption spectroscopy was performed using a spectrophotometer, equipped with a temperature control unit at 25 °C. The samples were measured in a 1.5 mL quartz cuvettes fitted with a PTFE stopper. **1'**, **2** and TsOH were prepared as a 0.1 mM solution with fresh DCE as the solvent for measurement.

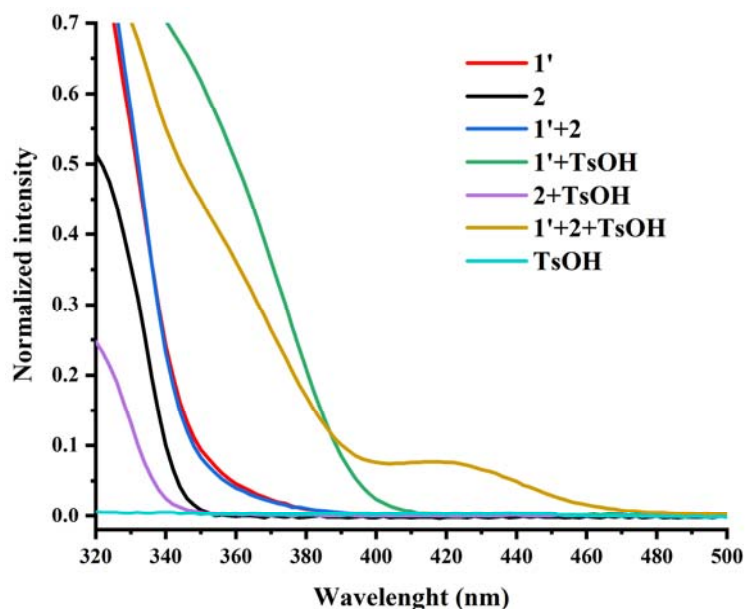

Fig. S1. UV-vis absorption spectra of **1'**, **2** and TsOH.

**Comments:** The results indicate that EDA complex of **1'** and TsOH is generated in the reaction system.

### 6.2 Emission spectrum of the LED light

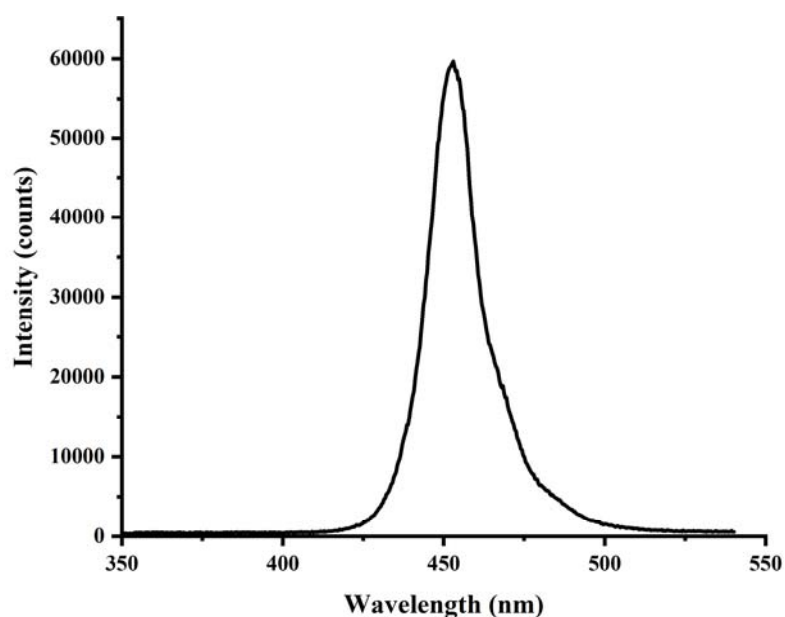

Fig. S2. Emission spectrum of the 3 W Blue LED light.



### 6.3 Stoichiometry of the EDA Complex in Solution

The Job's plot was constructed to evaluate the stoichiometry of the EDA complex<sup>2</sup> between unsaturated ketone derivative **1'** and TsOH. We measured the absorption of DCE solutions at 400 nm with different donor/acceptor ratios with constant concentration (0.05 M) of the two components. All the absorption spectra were recorded in 1 cm path quartz cuvettes using a UV/Vis spectrometer. The absorbance values were plotted against the molar fraction (%) of **1'**. The maximal absorbance at 50% molar fraction of **1'** indicated the 1:1 stoichiometry of the EDA complex in solution.

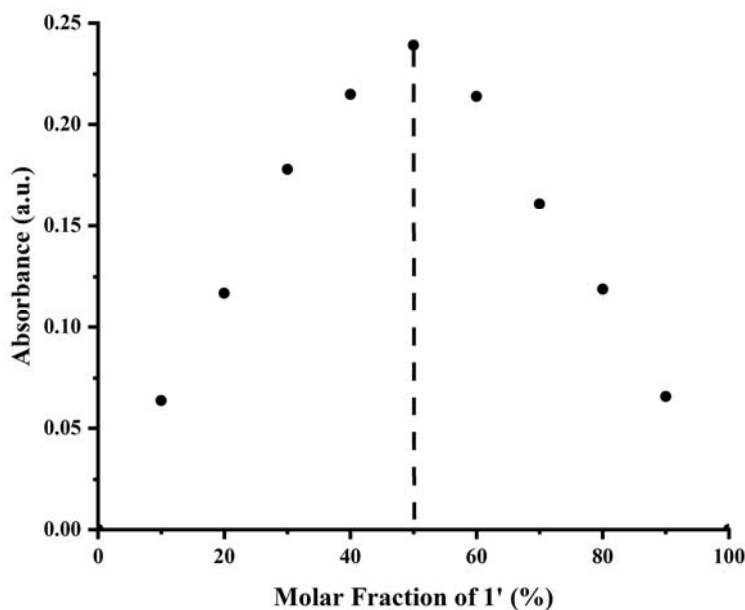

Fig. S3. Job's plots of the EDA complexes between **1'** and TsOH.

### 6.4 Determination of the Association Constant ( $K_{EDA}$ )

The association constant of the EDA complex formed between TsOH and **1** was determined spectrophotometrically in DCE, employing the Benesi-Hildebrand methodology<sup>[3]</sup>. We measured the absorption of solutions with constant concentration of TsOH and **1** (0.03 M) at 400 nm, and added an excess of TsOH to increase the donor/acceptor ratios. All the absorption spectra were recorded in 1 cm path quartz cuvettes using a UV/Vis spectrometer. According to the methodology, a straight line was obtained when the reciprocal of the absorbance ( $A$ ) was plotted against the reciprocal of the concentration of the partner in excess. Data obtained were displayed in Table S1. The association constants ( $K_{EDA}$ ) were calculated by dividing the intercept by the slope:  $15.9 \text{ M}^{-1}$  for the **1**/TsOH complex;  $18.3 \text{ M}^{-1}$  for the **1'**/TsOH complex;

**Table S1:** Data obtained by UV/vis absorption spectra for EDA in DCE, with  $[1] = 0.03 \text{ M}$

| [TsOH] | $1/[\text{TsOH}] (\text{M}^{-1})$ | $\text{Abs}_{\text{SEDA}}$ | $1/(\text{Abs}_{\text{SEDA}} - A_0)$ |
|--------|-----------------------------------|----------------------------|--------------------------------------|
| 0.03   | 33.3                              | 0.555                      | 1.802                                |
| 0.04   | 25                                | 0.632                      | 1.581                                |

|      |      |       |       |
|------|------|-------|-------|
| 0.05 | 20   | 0.713 | 1.403 |
| 0.06 | 16.7 | 0.840 | 1.190 |
| 0.07 | 14.3 | 0.910 | 1.099 |
| 0.08 | 12.5 | 0.943 | 1.061 |

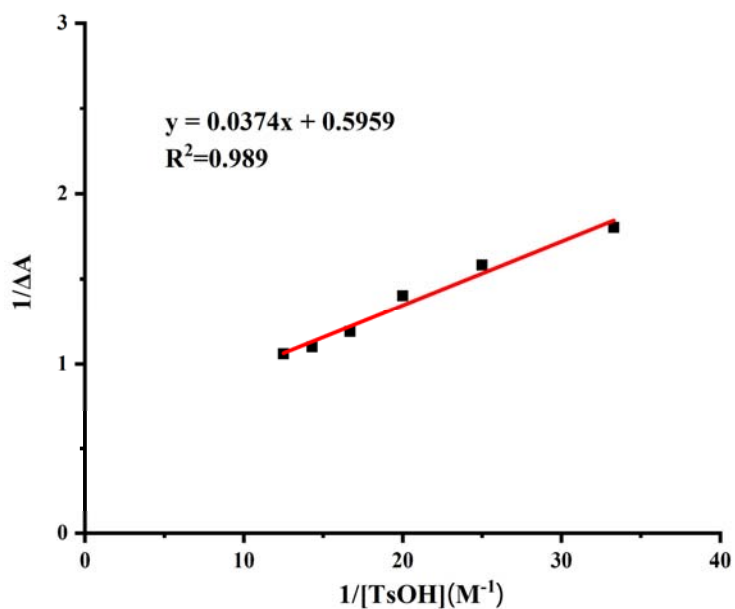

**Fig. S4.** Hildebrand-Benesi plots for the EDA complexes generated in DCE upon association of the **1** and TsOH.

**Table S2:** Data obtained by UV/vis absorption spectra for EDA in DCE, with  $[\mathbf{1}'] = 0.03 \text{ M}$

| [TsOH] | $1/[\text{TsOH}](\text{M}^{-1})$ | $\text{Abs}_{\text{SEDA}}$ | $1/(\text{Abs}_{\text{SEDA}} - A_0)$ |
|--------|----------------------------------|----------------------------|--------------------------------------|
| 0.03   | 33.3                             | 0.196                      | 5.102                                |
| 0.04   | 25                               | 0.216                      | 4.632                                |
| 0.05   | 20                               | 0.245                      | 4.081                                |
| 0.06   | 16.7                             | 0.284                      | 3.522                                |
| 0.07   | 14.3                             | 0.300                      | 3.333                                |
| 0.08   | 12.5                             | 0.333                      | 3.001                                |

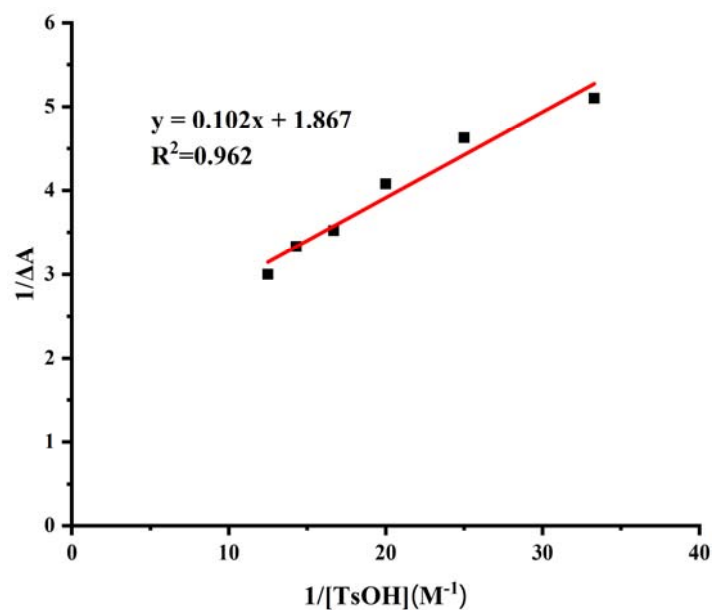

**Fig. S5.** Hildebrand-Benesi plots for the EDA complexes generated in DCE upon association of the **1'** and TsOH.

### 6.5 NMR Titration Experiments

Solutions containing equal molar concentrations of the donor (TsOH, 0.2 M in acetone-D<sub>6</sub>) and the acceptor (**1**, 0.2 M in Acetone-D<sub>6</sub>) were prepared and mixed to cover acceptor/donor ratio from 0%, 10%, 20% to 100% donor (from 1 to 11 in Figure S6).

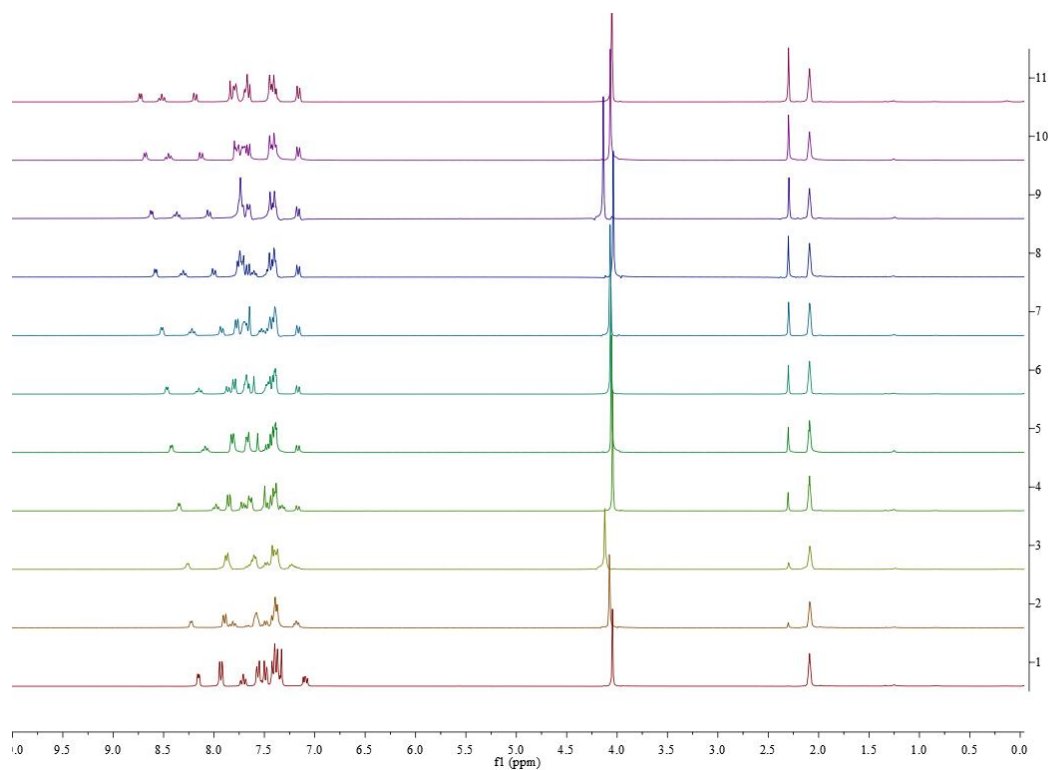

**Fig. S6.** <sup>1</sup>H NMR titration between TsOH and **1**.

In NMR titration experiments, we observed <sup>1</sup>H NMR signal of **1** shifted downfield with the addition of TsOH.

Solutions containing equal molar concentrations of the donor (TsOH, 0.2 M in acetone-D6) and the acceptor (**1'**, 0.2 M in Acetone-D6) were prepared and mixed to cover acceptor/donor ratio from 0%, 10%, 20% to 100% donor (from 1 to 11 in Figure S7).

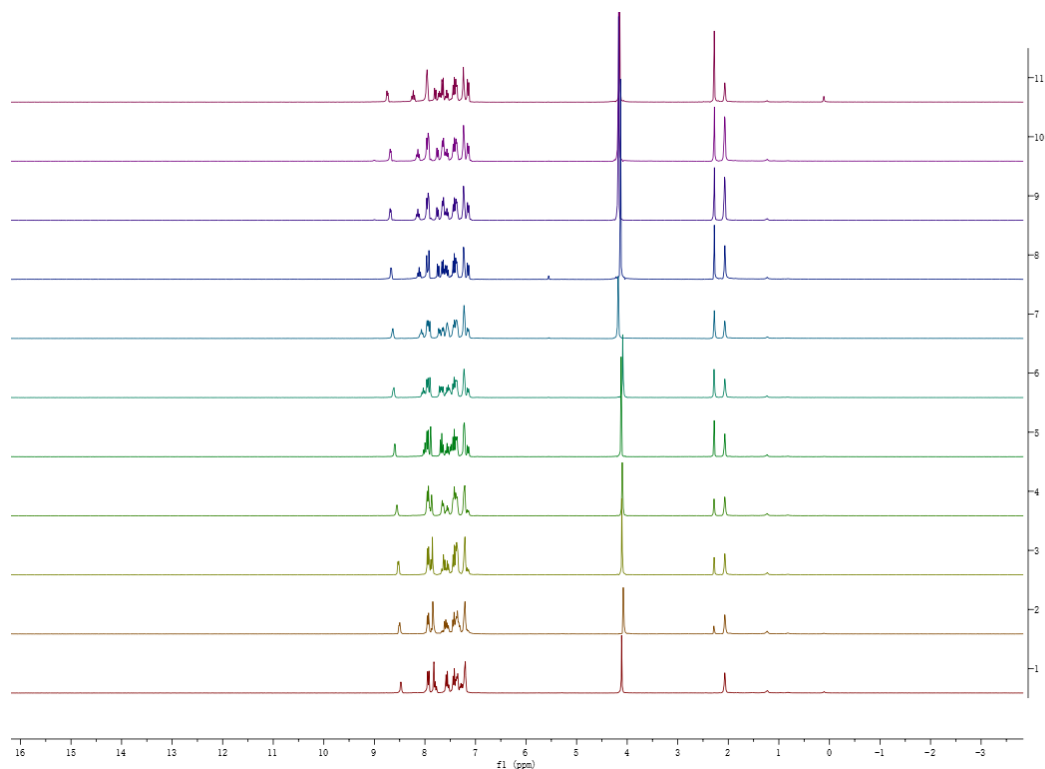

**Fig. S7.**  $^1\text{H}$  NMR titration between TsOH and **1'**.

In NMR titration experiments, we observed  $^1\text{H}$  NMR signal of **1'** shifted downfield with the addition of TsOH.

## 7. Emission quenching experiment

Emission intensities were recorded on a spectrofluorometer. EDA complex of **1** and TsOH solution was excited at 400 nm and the emission intensity at 460 nm was observed. A solution of EDA complexes ( $5.0 \times 10^{-5}$  M) in mixed cumene: DCE (V/V = 2: 1) was added to the appropriate amount of quencher in 3.0 mL volumetric flask under  $N_2$ . The solution was transferred to a 3.0 mL quartz cell and the emission spectrum of the sample was collected.

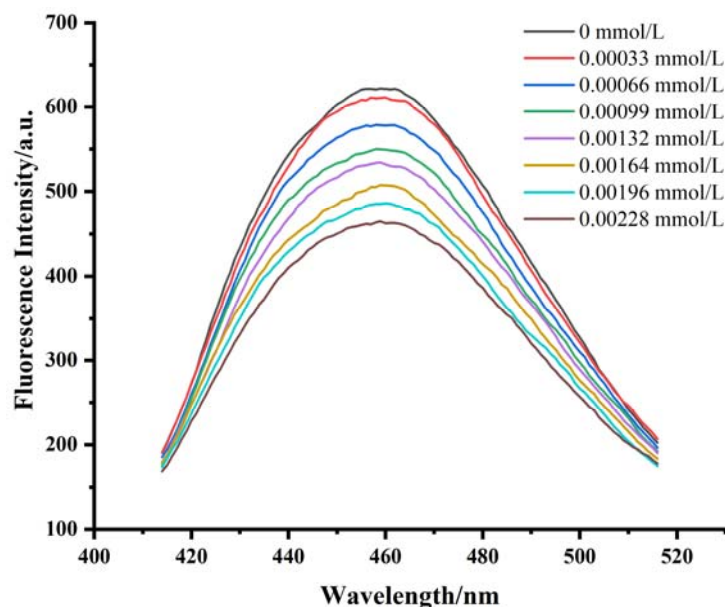

Fig. S8. Different concentrations of **2**.

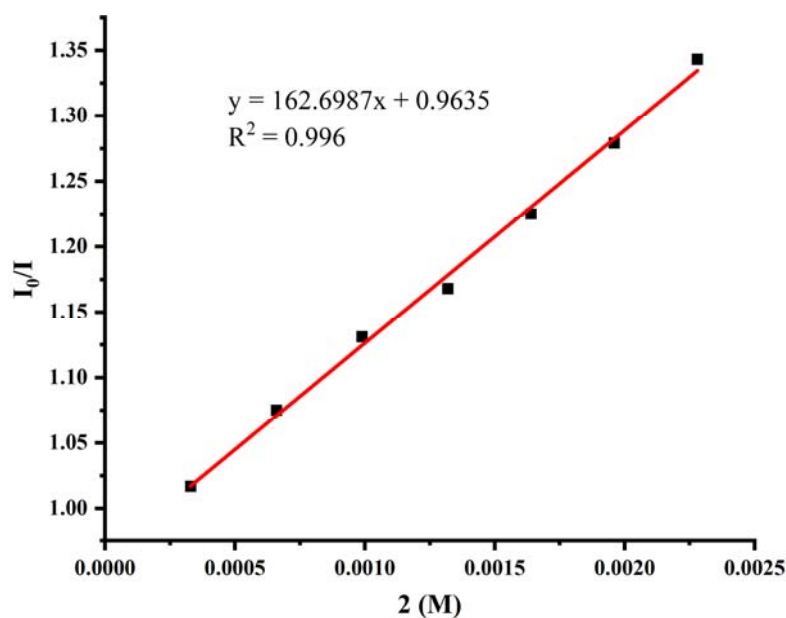

Fig. S9. Stern–Volmer quenching experiment of EDA complex of **1** and TsOH and **2** in DCE.

## 8. Cyclic voltammetry measurement

Electrochemical potentials were obtained with a standard set of conditions to maintain internal consistency. Cyclic voltammograms were collected with a potentiostat. Samples were prepared with 0.01 mmol of **1**, in 10 mL of 0.1 M tetrabutylammonium hexafluorophosphate in anhydrous acetonitrile. Measurements employed a radium glassy carbon working electrode, platinum wire counter electrode, saturated KCl silver-silver chloride reference electrode. The obtained value was referenced to Ag/AgCl. The obtained value was referenced to Ag/AgCl and converted to SCE by adding 0.03 V.

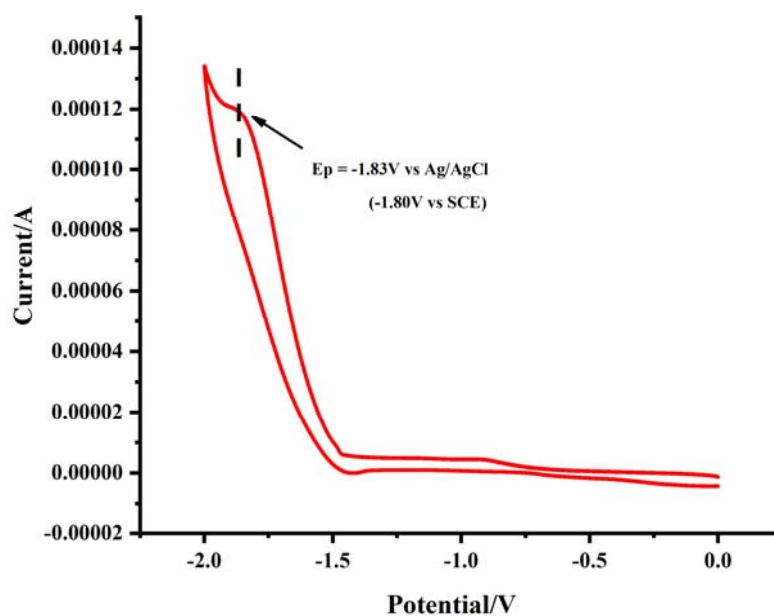

Fig. S10. Cyclic voltammogram of **1** in MeCN.

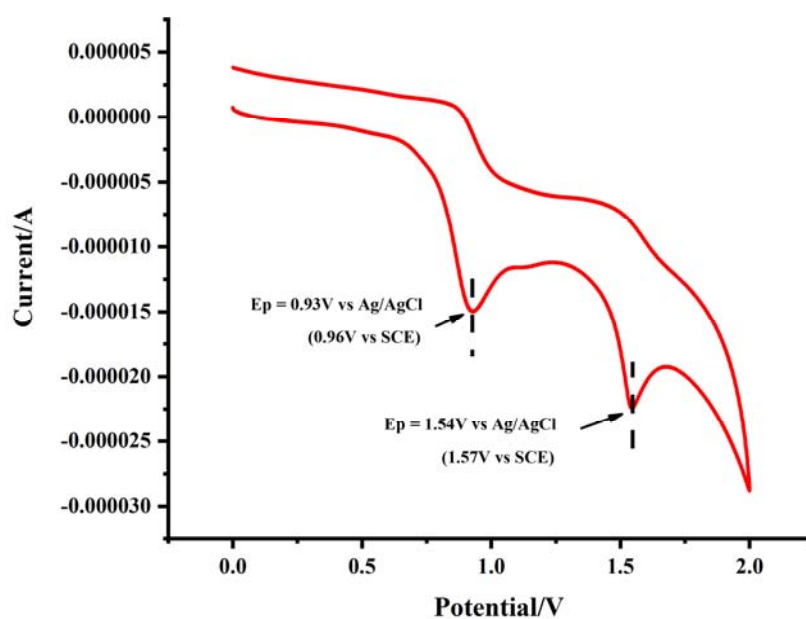

Fig. S11. Cyclic voltammogram of **2** in MeCN.

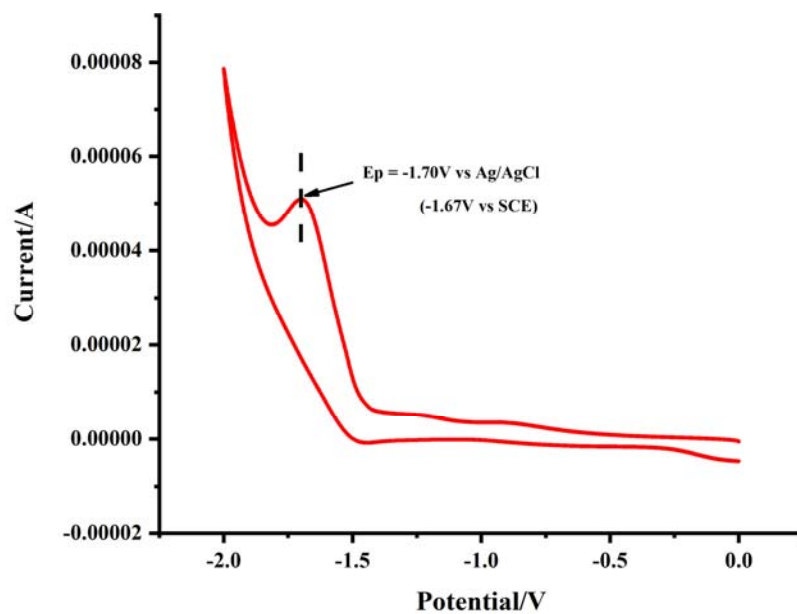

Fig. S12. Cyclic voltammogram of **1'** in MeCN.

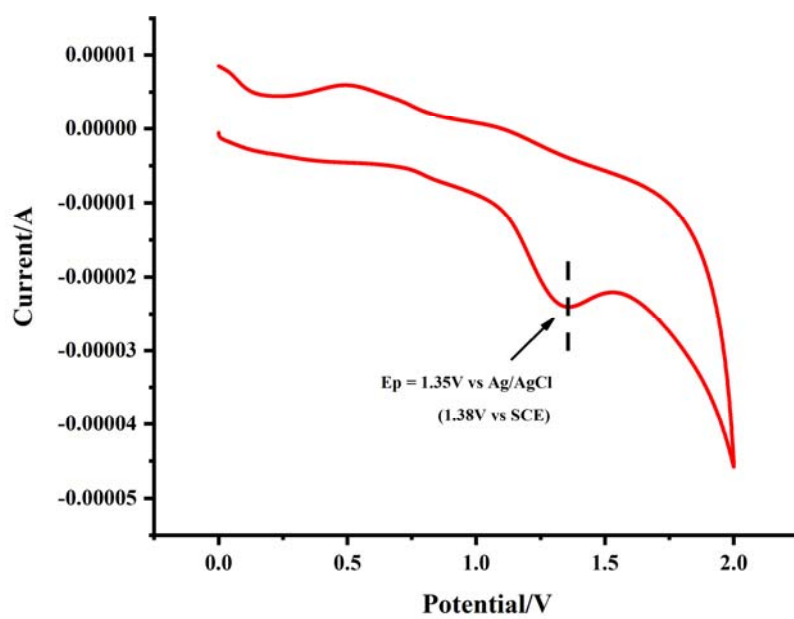

Fig. S13. Cyclic voltammogram of TsOH in MeCN.

## 9. Other experiments for exploring mechanism

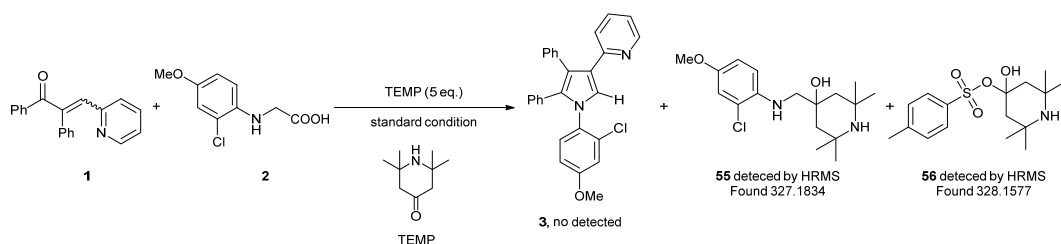

**1** (0.1 mmol, 1.0 equiv.), **2** (0.15 mmol, 1.5 equiv.), TsOH (0.1 mmol, 1.0 equiv.) and TEMP (0.5 mmol, 5 equiv.) in cumene/DCE (v/v = 2:1, 4.5 mL) was added into a 10 mL Schlenk tube, degassed three times by freeze-pump-thaw method. The reaction mixture was stirred under an argon atmosphere at 25 °C (the temperature was maintained in an incubator) and irradiated by a 3 W blue LED ( $\lambda_{\text{max}} = 452 \text{ nm}$ ) for 18 h. (The reaction solution was detected by HRMS analysis and the **3** was not found, **55** and **56** were detected by HRMS)

HRMS of **55**: calc. for  $\text{C}_{17}\text{H}_{27}\text{ClN}_2\text{O}_2$  ( $\text{M}+\text{H}^+$ ) 327.1834; Found 327.1834.

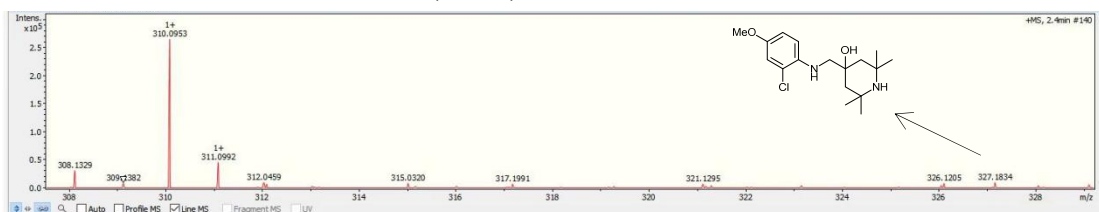

HRMS of **56**: calc. for  $\text{C}_{16}\text{H}_{25}\text{NO}_4\text{S}$  ( $\text{M}+\text{H}^+$ ) 328.1577; Found 328.1577.

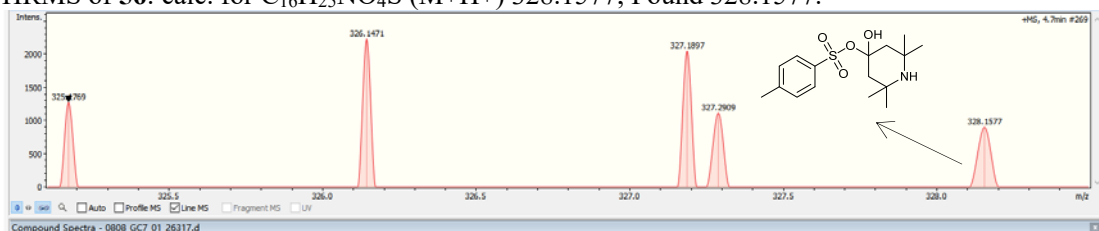



## 10. X-Ray crystallographic data

The structure of products was confirmed by X-ray crystallographic analysis of a single crystal of compound **28** (CCDC2256338).

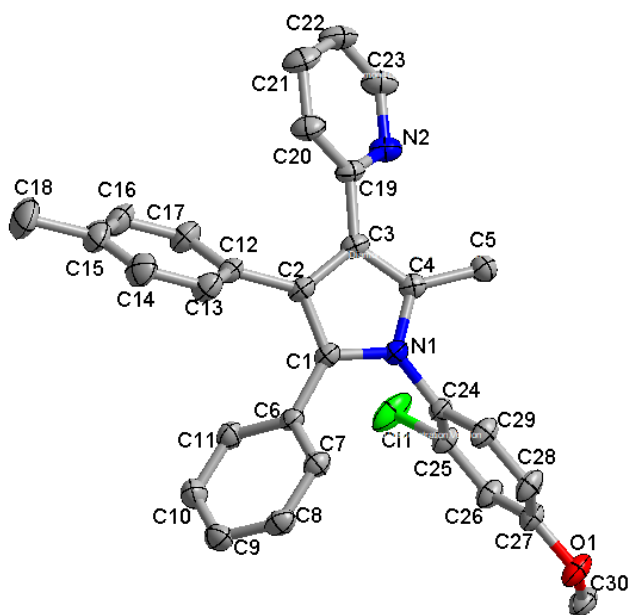

**Fig. S14.** Relative configuration of product **28**

Displacement ellipsoids are drawn at the 30% probability level.

(Solvents: ethyl acetate/petroleum ether = 1:10)

**Table S3** Crystal data and structure refinement for **28** (CCDC 2256338).

|                                    |                                                    |
|------------------------------------|----------------------------------------------------|
| Identification code                |                                                    |
| Empirical formula                  | C <sub>30</sub> H <sub>25</sub> ClN <sub>2</sub> O |
| Formula weight                     | 464.97                                             |
| Temperature/K                      | 293(2)                                             |
| Crystal system                     | monoclinic                                         |
| Space group                        | P2 <sub>1</sub> /n                                 |
| a/Å                                | 6.72673(14)                                        |
| b/Å                                | 18.4617(4)                                         |
| c/Å                                | 19.8732(5)                                         |
| α/°                                | 90                                                 |
| β/°                                | 93.1900(19)                                        |
| γ/°                                | 90                                                 |
| Volume/Å <sup>3</sup>              | 2464.16(10)                                        |
| Z                                  | 4                                                  |
| ρ <sub>calc</sub> /cm <sup>3</sup> | 1.253                                              |
| μ/mm <sup>-1</sup>                 | 1.559                                              |
| F(000)                             | 976.0                                              |
| Crystal size/mm <sup>3</sup>       | 0.16 × 0.12 × 0.1                                  |
| Radiation                          | CuKα (λ = 1.54184)                                 |
| 2θ range for data collection/°     | 8.914 to 141.588                                   |

|                                             |                                                               |
|---------------------------------------------|---------------------------------------------------------------|
| Index ranges                                | -8 ≤ h ≤ 6, -22 ≤ k ≤ 22, -24 ≤ l ≤ 21                        |
| Reflections collected                       | 9959                                                          |
| Independent reflections                     | 4654 [R <sub>int</sub> = 0.0330, R <sub>sigma</sub> = 0.0464] |
| Data/restraints/parameters                  | 4654/0/310                                                    |
| Goodness-of-fit on F <sup>2</sup>           | 1.041                                                         |
| Final R indexes [I >= 2σ (I)]               | R <sub>1</sub> = 0.0582, wR <sub>2</sub> = 0.1552             |
| Final R indexes [all data]                  | R <sub>1</sub> = 0.0719, wR <sub>2</sub> = 0.1722             |
| Largest diff. peak/hole / e Å <sup>-3</sup> | 0.34/-0.45                                                    |

**Table S4** Fractional Atomic Coordinates ( $\times 10^4$ ) and Equivalent Isotropic Displacement Parameters ( $\text{\AA}^2 \times 10^3$ ) for **28**.  $U_{\text{eq}}$  is defined as 1/3 of the trace of the orthogonalised  $U_{ij}$  tensor.

| Atom | x          | y          | z          | U(eq)     |
|------|------------|------------|------------|-----------|
| C11  | -148.0(12) | 4450.3(5)  | 3971.9(4)  | 86.4(3)   |
| O1   | 5688(3)    | 4011.2(11) | 5675.4(9)  | 63.2(5)   |
| N1   | 1881(3)    | 3312.8(10) | 3195.6(9)  | 40.6(4)   |
| N2   | -3645(3)   | 2296.2(12) | 2642.7(11) | 53.7(5)   |
| C1   | 2092(3)    | 3645.2(12) | 2574.7(10) | 40.6(5)   |
| C2   | 691(3)     | 3343.1(12) | 2124.1(11) | 42.9(5)   |
| C3   | -448(3)    | 2834.6(12) | 2487.2(11) | 42.7(5)   |
| C4   | 321(3)     | 2827.1(12) | 3144.8(11) | 42.5(5)   |
| C5   | -199(4)    | 2385.6(14) | 3739.3(13) | 52.8(6)   |
| C6   | 3528(3)    | 4230.4(12) | 2467.3(10) | 41.2(5)   |
| C7   | 5551(3)    | 4162.7(13) | 2639.3(12) | 46.9(5)   |
| C8   | 6866(4)    | 4712.2(16) | 2501.9(13) | 54.5(6)   |
| C9   | 6194(4)    | 5342.0(15) | 2193.0(13) | 59.3(6)   |
| C10  | 4186(4)    | 5417.5(15) | 2025.6(14) | 62.4(7)   |
| C11  | 2866(4)    | 4871.8(15) | 2161.0(13) | 53.5(6)   |
| C12  | 514(4)     | 3527.6(13) | 1394.0(11) | 48.2(5)   |
| C13  | 2156(4)    | 3469.3(16) | 1006.6(13) | 60.4(7)   |
| C14  | 2028(5)    | 3638.3(19) | 324.0(14)  | 72.5(8)   |
| C15  | 274(6)     | 3873.2(18) | 10.9(14)   | 72.6(8)   |
| C16  | -1373(5)   | 3936.4(19) | 395.8(15)  | 75.6(9)   |
| C17  | -1261(4)   | 3770.4(17) | 1079.6(14) | 61.9(7)   |
| C18  | 138(8)     | 4066(3)    | -734.1(16) | 107.4(14) |
| C19  | -2185(3)   | 2406.7(12) | 2219.6(12) | 45.5(5)   |
| C20  | -2335(4)   | 2153.2(16) | 1561.4(14) | 61.0(7)   |
| C21  | -4081(5)   | 1808.7(18) | 1328.9(17) | 74.9(9)   |
| C22  | -5568(4)   | 1704.8(18) | 1761.6(18) | 75.2(9)   |
| C23  | -5280(4)   | 1947.8(16) | 2410.0(16) | 65.5(7)   |
| C24  | 2854(3)    | 3513.8(12) | 3827.3(10) | 40.0(4)   |
| C25  | 2044(3)    | 4016.4(13) | 4239.6(11) | 46.4(5)   |
| C26  | 2916(4)    | 4203.0(14) | 4863.7(11) | 49.9(5)   |
| C27  | 4669(4)    | 3864.6(13) | 5079.4(11) | 47.1(5)   |
| C28  | 5488(4)    | 3345.8(16) | 4680.3(13) | 56.7(6)   |
| C29  | 4597(4)    | 3171.3(14) | 4059.8(12) | 51.0(6)   |
| C30  | 4843(5)    | 4516.5(16) | 6119.0(13) | 62.8(7)   |

**Table S5** Anisotropic Displacement Parameters ( $\text{\AA}^2 \times 10^3$ ) for **28**. The Anisotropic displacement factor exponent takes the form:  $-2\pi^2[h^2a^{*2}U_{11}+2hka^*b^*U_{12}+\dots]$ .

| Atom | $U_{11}$ | $U_{22}$ | $U_{33}$ | $U_{23}$  | $U_{13}$  | $U_{12}$  |
|------|----------|----------|----------|-----------|-----------|-----------|
| C11  | 69.7(5)  | 111.7(6) | 74.2(5)  | -31.1(4)  | -27.6(4)  | 49.1(4)   |
| O1   | 66.5(11) | 79.5(12) | 41.4(9)  | -11.2(8)  | -17.0(8)  | 17.2(9)   |
| N1   | 38.6(9)  | 47.0(9)  | 35.7(9)  | -2.4(7)   | -1.7(7)   | -0.2(7)   |
| N2   | 44.8(10) | 55.4(11) | 60.9(12) | -10.8(9)  | 1.6(9)    | -6.3(9)   |
| C1   | 37.4(10) | 48.1(11) | 35.8(10) | -3.1(8)   | -2.0(8)   | 0.6(9)    |
| C2   | 38.9(10) | 51.1(12) | 38.0(11) | -5.6(9)   | -3.2(8)   | 1.3(9)    |
| C3   | 37.3(10) | 47.6(11) | 42.9(11) | -8.9(9)   | -0.6(8)   | 0.7(9)    |
| C4   | 40.3(10) | 43.2(10) | 44.0(11) | -3.7(9)   | 1.1(8)    | -0.7(9)   |
| C5   | 51.4(13) | 57.3(14) | 49.6(13) | 4.4(11)   | 0.9(10)   | -5.8(11)  |
| C6   | 39.7(11) | 50.2(11) | 33.2(10) | -3.5(8)   | -1.3(8)   | -3.4(9)   |
| C7   | 42.2(11) | 52.6(12) | 45.7(12) | -3.7(9)   | -0.1(9)   | 4.0(10)   |
| C8   | 37.5(11) | 72.6(16) | 53.2(14) | -6.3(12)  | -0.2(9)   | -5.0(11)  |
| C9   | 60.0(15) | 65.3(15) | 52.8(14) | 1.9(12)   | 4.8(11)   | -18.7(12) |
| C10  | 65.5(16) | 58.8(15) | 62.2(16) | 14.6(12)  | -2.9(12)  | -5.1(12)  |
| C11  | 45.0(12) | 61.6(14) | 52.9(13) | 8.3(11)   | -7.2(10)  | 0.3(10)   |
| C12  | 51.1(12) | 55.6(13) | 36.7(11) | -5.1(9)   | -7.4(9)   | -3.6(10)  |
| C13  | 54.8(14) | 80.9(18) | 45.2(13) | -3.9(12)  | -0.8(10)  | -0.9(13)  |
| C14  | 81(2)    | 93(2)    | 44.8(14) | -6.7(14)  | 11.3(13)  | -6.6(17)  |
| C15  | 101(2)   | 76.3(19) | 39.7(13) | -1.4(13)  | -4.0(14)  | -4.3(17)  |
| C16  | 82(2)    | 88(2)    | 53.4(16) | -2.9(15)  | -25.1(15) | 8.8(17)   |
| C17  | 57.7(15) | 77.7(17) | 48.8(14) | -4.4(12)  | -10.0(11) | 4.9(13)   |
| C18  | 156(4)   | 122(3)   | 42.3(17) | 9.9(18)   | -12(2)    | -3(3)     |
| C19  | 43.0(11) | 41.5(10) | 51.5(12) | -9.4(9)   | -2.7(9)   | -0.6(9)   |
| C20  | 61.4(15) | 64.4(15) | 57.0(15) | -19.7(12) | 2.1(12)   | -5.6(12)  |
| C21  | 77(2)    | 78.2(19) | 68.1(18) | -29.9(15) | -11.6(15) | -7.9(15)  |
| C22  | 54.9(16) | 73.3(18) | 95(2)    | -19.6(17) | -15.6(15) | -15.0(14) |
| C23  | 46.8(13) | 67.1(16) | 82.2(19) | -11.3(14) | 0.2(12)   | -10.9(12) |
| C24  | 38.9(10) | 46.5(11) | 34.2(10) | -0.3(8)   | -1.4(8)   | -1.5(8)   |
| C25  | 40.9(11) | 54.9(12) | 42.4(11) | -1.6(9)   | -5.6(9)   | 7.9(9)    |
| C26  | 53.5(13) | 56.1(13) | 39.8(11) | -9.0(10)  | -1.5(9)   | 10.2(11)  |
| C27  | 50.1(12) | 55.6(13) | 34.7(11) | 0.4(9)    | -5.8(9)   | 2.8(10)   |
| C28  | 48.6(13) | 72.8(16) | 47.2(13) | -3.7(11)  | -10.2(10) | 21.8(12)  |
| C29  | 49.0(12) | 59.8(14) | 43.7(12) | -7.6(10)  | -3.4(9)   | 14.9(10)  |
| C30  | 78.4(18) | 67.6(16) | 41.0(13) | -10.2(11) | -11.4(12) | 2.9(14)   |

**Table S6** Bond Lengths for **28**.

| Atom | Atom | Length/ $\text{\AA}$ | Atom | Atom | Length/ $\text{\AA}$ |
|------|------|----------------------|------|------|----------------------|
| C11  | C25  | 1.735(2)             | C9   | C10  | 1.380(4)             |
| O1   | C27  | 1.362(3)             | C10  | C11  | 1.379(4)             |
| O1   | C30  | 1.424(3)             | C12  | C13  | 1.385(4)             |
| N1   | C1   | 1.392(3)             | C12  | C17  | 1.391(4)             |
| N1   | C4   | 1.380(3)             | C13  | C14  | 1.390(4)             |
| N1   | C24  | 1.432(3)             | C14  | C15  | 1.374(5)             |
| N2   | C19  | 1.344(3)             | C15  | C16  | 1.386(5)             |
| N2   | C23  | 1.334(3)             | C15  | C18  | 1.520(4)             |

|    |     |          |     |     |          |
|----|-----|----------|-----|-----|----------|
| C1 | C2  | 1.381(3) | C16 | C17 | 1.391(4) |
| C1 | C6  | 1.472(3) | C19 | C20 | 1.388(3) |
| C2 | C3  | 1.432(3) | C20 | C21 | 1.392(4) |
| C2 | C12 | 1.489(3) | C21 | C22 | 1.369(5) |
| C3 | C4  | 1.378(3) | C22 | C23 | 1.368(4) |
| C3 | C19 | 1.484(3) | C24 | C25 | 1.371(3) |
| C4 | C5  | 1.493(3) | C24 | C29 | 1.389(3) |
| C6 | C7  | 1.390(3) | C25 | C26 | 1.386(3) |
| C6 | C11 | 1.393(3) | C26 | C27 | 1.382(3) |
| C7 | C8  | 1.383(4) | C27 | C28 | 1.378(3) |
| C8 | C9  | 1.379(4) | C28 | C29 | 1.379(3) |

**Table S7** Bond Angles for **28**.

| Atom | Atom | Atom | Angle/°    | Atom | Atom | Atom | Angle/°    |
|------|------|------|------------|------|------|------|------------|
| C27  | O1   | C30  | 118.0(2)   | C17  | C12  | C2   | 122.1(2)   |
| C1   | N1   | C24  | 126.78(18) | C12  | C13  | C14  | 121.1(3)   |
| C4   | N1   | C1   | 109.64(17) | C15  | C14  | C13  | 121.2(3)   |
| C4   | N1   | C24  | 122.75(18) | C14  | C15  | C16  | 118.0(3)   |
| C23  | N2   | C19  | 118.3(2)   | C14  | C15  | C18  | 121.2(3)   |
| N1   | C1   | C6   | 123.49(18) | C16  | C15  | C18  | 120.7(3)   |
| C2   | C1   | N1   | 107.28(19) | C15  | C16  | C17  | 121.3(3)   |
| C2   | C1   | C6   | 129.2(2)   | C12  | C17  | C16  | 120.6(3)   |
| C1   | C2   | C3   | 107.64(19) | N2   | C19  | C3   | 116.4(2)   |
| C1   | C2   | C12  | 123.7(2)   | N2   | C19  | C20  | 121.4(2)   |
| C3   | C2   | C12  | 128.69(19) | C20  | C19  | C3   | 122.1(2)   |
| C2   | C3   | C19  | 126.9(2)   | C19  | C20  | C21  | 118.9(3)   |
| C4   | C3   | C2   | 107.54(18) | C22  | C21  | C20  | 119.2(3)   |
| C4   | C3   | C19  | 125.5(2)   | C23  | C22  | C21  | 118.4(3)   |
| N1   | C4   | C5   | 120.5(2)   | N2   | C23  | C22  | 123.7(3)   |
| C3   | C4   | N1   | 107.84(19) | C25  | C24  | N1   | 121.49(19) |
| C3   | C4   | C5   | 131.6(2)   | C25  | C24  | C29  | 117.8(2)   |
| C7   | C6   | C1   | 122.6(2)   | C29  | C24  | N1   | 120.65(19) |
| C7   | C6   | C11  | 117.9(2)   | C24  | C25  | C11  | 119.23(17) |
| C11  | C6   | C1   | 119.4(2)   | C24  | C25  | C26  | 122.7(2)   |
| C8   | C7   | C6   | 120.9(2)   | C26  | C25  | C11  | 118.03(18) |
| C9   | C8   | C7   | 120.6(2)   | C27  | C26  | C25  | 118.5(2)   |
| C8   | C9   | C10  | 119.0(2)   | O1   | C27  | C26  | 124.0(2)   |
| C11  | C10  | C9   | 120.7(3)   | O1   | C27  | C28  | 116.2(2)   |
| C10  | C11  | C6   | 120.9(2)   | C28  | C27  | C26  | 119.8(2)   |
| C13  | C12  | C2   | 120.1(2)   | C27  | C28  | C29  | 120.6(2)   |
| C13  | C12  | C17  | 117.8(2)   | C28  | C29  | C24  | 120.5(2)   |

**Table S8** Torsion Angles for **28**.

| A   | B   | C   | D   | Angle/°   | A  | B   | C   | D   | Angle/° |
|-----|-----|-----|-----|-----------|----|-----|-----|-----|---------|
| C11 | C25 | C26 | C27 | -179.5(2) | C6 | C7  | C8  | C9  | 0.3(4)  |
| O1  | C27 | C28 | C29 | -178.4(3) | C7 | C6  | C11 | C10 | 0.8(4)  |
| N1  | C1  | C2  | C3  | 2.2(2)    | C7 | C8  | C9  | C10 | 0.3(4)  |
| N1  | C1  | C2  | C12 | -176.5(2) | C8 | C9  | C10 | C11 | -0.3(4) |
| N1  | C1  | C6  | C7  | 54.4(3)   | C9 | C10 | C11 | C6  | -0.3(4) |

|    |     |     |     |           |     |     |     |     |             |
|----|-----|-----|-----|-----------|-----|-----|-----|-----|-------------|
| N1 | C1  | C6  | C11 | -127.8(2) | C11 | C6  | C7  | C8  | -0.8(3)     |
| N1 | C24 | C25 | C11 | -3.1(3)   | C12 | C2  | C3  | C4  | 177.2(2)    |
| N1 | C24 | C25 | C26 | 177.7(2)  | C12 | C2  | C3  | C19 | -4.6(4)     |
| N1 | C24 | C29 | C28 | -177.4(2) | C12 | C13 | C14 | C15 | 0.4(5)      |
| N2 | C19 | C20 | C21 | 3.2(4)    | C13 | C12 | C17 | C16 | 1.0(4)      |
| C1 | N1  | C4  | C3  | 1.3(2)    | C13 | C14 | C15 | C16 | -0.1(5)     |
| C1 | N1  | C4  | C5  | 178.8(2)  | C13 | C14 | C15 | C18 | 179.4(3)    |
| C1 | N1  | C24 | C25 | 88.5(3)   | C14 | C15 | C16 | C17 | 0.2(5)      |
| C1 | N1  | C24 | C29 | -95.4(3)  | C15 | C16 | C17 | C12 | -0.7(5)     |
| C1 | C2  | C3  | C4  | -1.5(2)   | C17 | C12 | C13 | C14 | -0.9(4)     |
| C1 | C2  | C3  | C19 | 176.7(2)  | C18 | C15 | C16 | C17 | -179.2(3)   |
| C1 | C2  | C12 | C13 | 54.1(3)   | C19 | N2  | C23 | C22 | -0.9(4)     |
| C1 | C2  | C12 | C17 | -125.0(3) | C19 | C3  | C4  | N1  | -178.1(2)   |
| C1 | C6  | C7  | C8  | 177.0(2)  | C19 | C3  | C4  | C5  | 4.8(4)      |
| C1 | C6  | C11 | C10 | -177.1(2) | C19 | C20 | C21 | C22 | -2.5(5)     |
| C2 | C1  | C6  | C7  | -128.4(3) | C20 | C21 | C22 | C23 | 0.2(5)      |
| C2 | C1  | C6  | C11 | 49.3(3)   | C21 | C22 | C23 | N2  | 1.6(5)      |
| C2 | C3  | C4  | N1  | 0.1(2)    | C23 | N2  | C19 | C3  | 176.4(2)    |
| C2 | C3  | C4  | C5  | -177.0(2) | C23 | N2  | C19 | C20 | -1.5(4)     |
| C2 | C3  | C19 | N2  | -143.8(2) | C24 | N1  | C1  | C2  | -171.9(2)   |
| C2 | C3  | C19 | C20 | 34.1(4)   | C24 | N1  | C1  | C6  | 5.7(3)      |
| C2 | C12 | C13 | C14 | 180.0(3)  | C24 | N1  | C4  | C3  | 171.50(19)  |
| C2 | C12 | C17 | C16 | -179.9(3) | C24 | N1  | C4  | C5  | -11.0(3)    |
| C3 | C2  | C12 | C13 | -124.4(3) | C24 | C25 | C26 | C27 | -0.3(4)     |
| C3 | C2  | C12 | C17 | 56.5(4)   | C25 | C24 | C29 | C28 | -1.2(4)     |
| C3 | C19 | C20 | C21 | -174.6(3) | C25 | C26 | C27 | O1  | 178.7(2)    |
| C4 | N1  | C1  | C2  | -2.2(2)   | C25 | C26 | C27 | C28 | -1.1(4)     |
| C4 | N1  | C1  | C6  | 175.5(2)  | C26 | C27 | C28 | C29 | 1.4(4)      |
| C4 | N1  | C24 | C25 | -80.0(3)  | C27 | C28 | C29 | C24 | -0.3(4)     |
| C4 | N1  | C24 | C29 | 96.2(3)   | C29 | C24 | C25 | C11 | -179.34(19) |
| C4 | C3  | C19 | N2  | 34.0(3)   | C29 | C24 | C25 | C26 | 1.5(4)      |
| C4 | C3  | C19 | C20 | -148.1(3) | C30 | O1  | C27 | C26 | 3.4(4)      |
| C6 | C1  | C2  | C3  | -175.3(2) | C30 | O1  | C27 | C28 | -176.8(3)   |
| C6 | C1  | C2  | C12 | 6.0(4)    |     |     |     |     |             |

**Table S9** Hydrogen Atom Coordinates ( $\text{\AA}\times 10^4$ ) and Isotropic Displacement Parameters ( $\text{\AA}^2\times 10^3$ ) for **28**.

| Atom | <i>x</i> | <i>y</i> | <i>z</i> | U(eq) |
|------|----------|----------|----------|-------|
| H5A  | 962      | 2132     | 3916     | 79    |
| H5B  | -1216    | 2042     | 3604     | 79    |
| H5C  | -678     | 2698     | 4081     | 79    |
| H7   | 6027     | 3742     | 2850     | 56    |
| H8   | 8216     | 4657     | 2619     | 65    |
| H9   | 7080     | 5710     | 2099     | 71    |
| H10  | 3717     | 5841     | 1819     | 75    |
| H11  | 1517     | 4933     | 2046     | 64    |
| H13  | 3365     | 3314     | 1207     | 73    |
| H14  | 3151     | 3591     | 75       | 87    |
| H16  | -2576    | 4093     | 193      | 91    |

|      |       |      |      |     |
|------|-------|------|------|-----|
| H17  | -2383 | 3822 | 1329 | 74  |
| H18A | 1338  | 4306 | -849 | 161 |
| H18B | -979  | 4381 | -827 | 161 |
| H18C | -33   | 3632 | -997 | 161 |
| H20  | -1287 | 2213 | 1280 | 73  |
| H21  | -4235 | 1651 | 885  | 90  |
| H22  | -6747 | 1475 | 1618 | 90  |
| H23  | -6280 | 1865 | 2705 | 79  |
| H26  | 2334  | 4548 | 5131 | 60  |
| H28  | 6652  | 3111 | 4831 | 68  |
| H29  | 5169  | 2821 | 3795 | 61  |
| H30A | 5741  | 4591 | 6505 | 94  |
| H30B | 3602  | 4331 | 6262 | 94  |
| H30C | 4615  | 4969 | 5889 | 94  |

## 11. References

1. Z. Zhao; P. R. Bagdi; S. Yang; J. Liu; W. Xu; X. Fang. *Org. Lett.* **2019**, *21*, 5491.
2. P. Job. *Ann. Chim.* **1928**, *9*, 113.
3. H. A. Benesi; J. H. Hildebrand. *J. Am. Chem. Soc.* **1949**, *71*, 2703.

## 12. Characterization data

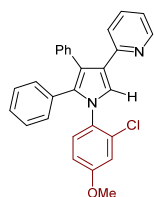

### 2-(1-(2-Chloro-4-methoxyphenyl)-4,5-diphenyl-1H-pyrrol-3-yl)pyridine (3):

brown solid; Mp: 174.3-175.6 °C; 40.6 mg, 93% yield; <sup>1</sup>H NMR (300 MHz, CDCl<sub>3</sub>) δ 8.55 (d, *J* = 4.0 Hz, 1H), 7.45 (s, 1H), 7.39 – 7.34 (m, 1H), 7.20 (m, 5H), 7.12 (d, *J* = 8.7 Hz, 1H), 7.05 (dt, *J* = 5.4, 3.0 Hz, 3H), 7.02 – 6.98 (m, 1H), 6.98 – 6.92 (m, 3H), 6.87 (d, *J* = 8.0 Hz, 1H), 6.69 (dd, *J* = 8.8, 2.8 Hz, 1H), 3.77 (s, 3H); <sup>13</sup>C NMR (75 MHz, CDCl<sub>3</sub>) δ 159.3, 154.3, 149.2, 135.6, 133.2, 132.8, 131.6, 131.0, 130.6, 130.5, 127.9, 127.5, 126.6, 126.1, 124.2, 123.9, 122.3, 121.9, 120.3, 114.8, 112.9, 55.6; HRMS (ESI) *m/z* 437.1412 (M+H<sup>+</sup>), calc. for C<sub>28</sub>H<sub>21</sub>ClN<sub>2</sub>O 437.1415.

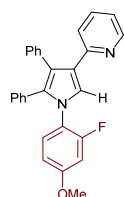

### 2-(1-(2-Fluoro-4-methoxyphenyl)-4,5-diphenyl-1H-pyrrol-3-yl)pyridine (4):

white solid; Mp: 166.1-167.3 °C; 34.5 mg, 82% yield; <sup>1</sup>H NMR (300 MHz, CDCl<sub>3</sub>) δ 8.55 (d, *J* = 4.8 Hz, 1H), 7.50 (s, 1H), 7.41 – 7.33 (m, 1H), 7.18 (dd, *J* = 7.2, 3.6 Hz, 5H), 7.13 – 7.05 (m, 4H), 7.04 – 6.99 (m, 1H), 6.98 – 6.92 (m, 2H), 6.85 (d, *J* = 8.0 Hz, 1H), 6.66 – 6.56 (m, 2H), 3.78 (s, 3H); <sup>13</sup>C NMR (75 MHz, CDCl<sub>3</sub>) δ 160.0 (d, *J* = 10.1 Hz), 157.7 (d, *J* = 250.5 Hz), 154.2, 149.1, 135.7 (d, *J* = 17.4 Hz), 133.2, 131.6, 131.0, 130.5, 129.7 (d, *J* = 2.0 Hz), 128.0, 127.6, 126.8, 126.2, 124.3, 124.0, 122.4, 122.2, 120.8, 120.7, 120.4, 109.7 (d, *J* = 3.3 Hz), 102.2 (d, *J* = 23.6 Hz), 55.7; <sup>19</sup>F NMR (471 MHz, CDCl<sub>3</sub>) δ -119.0; HRMS (ESI) *m/z* 421.1705 (M+H<sup>+</sup>), calc. for C<sub>28</sub>H<sub>21</sub>FN<sub>2</sub>O 421.1711.

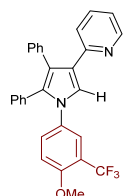

### 2-(1-(4-Methoxy-3-(trifluoromethyl)phenyl)-4,5-diphenyl-1H-pyrrol-3-yl)pyridine (5):

brown solid; Mp: 134.8-135.7 °C; 37.6 mg, 80% yield; <sup>1</sup>H NMR (300 MHz, CDCl<sub>3</sub>) δ 8.56 (d, *J* = 4.8 Hz, 1H), 7.60 (s, 1H), 7.49 (d, *J* = 2.5 Hz, 1H), 7.41 – 7.36 (m, 1H), 7.21 (td, *J* = 5.7, 2.4 Hz, 6H), 7.12 (dd, *J* = 5.0, 1.8 Hz, 3H), 7.06 – 7.01 (m, 1H), 6.96 (dd, *J* = 6.5, 3.1 Hz, 2H), 6.86 (d, *J* = 8.4 Hz, 2H), 3.87 (s, 3H); <sup>13</sup>C NMR (75 MHz, CDCl<sub>3</sub>) δ 155.9 (q, *J* = 1.6 Hz), 154.0, 149.2, 135.7, 135.3, 132.3 (q, *J* = 23.8 Hz), 131.3, 131.0, 130.5, 128.0, 127.8, 127.0, 126.3, 124.5 (q, *J* = 5.2 Hz), 123.2, 122.2, 120.6, 119.1, 118.7, 114.0, 112.1, 56.1; <sup>19</sup>F NMR (471 MHz, CDCl<sub>3</sub>) δ -62.8; HRMS (ESI) *m/z* 471.1674 (M+H<sup>+</sup>), calc. for C<sub>29</sub>H<sub>21</sub>F<sub>3</sub>N<sub>2</sub>O 471.1679.

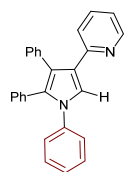

### 2-(1,4,5-Triphenyl-1H-pyrrol-3-yl)pyridine (6):

yellow oil; 32.8 mg, 88% yield; <sup>1</sup>H NMR (300 MHz, CDCl<sub>3</sub>) δ 8.55 (d, *J* = 4.7 Hz, 1H), 7.47 (d, *J* = 9.9 Hz, 1H), 7.34 (d, *J* = 8.3 Hz, 1H), 7.30 (s, 1H), 7.27 (s, 1H), 7.22 (d, *J* = 4.1 Hz, 4H), 7.20 – 7.13 (m, 4H), 7.13 – 7.08 (m, 3H), 7.04 (t, *J* = 8.7 Hz, 4H); <sup>13</sup>C NMR (75 MHz, CDCl<sub>3</sub>) δ 156.1, 149.2, 136.9, 133.4, 132.0, 130.3, 128.5, 127.9, 126.9, 126.5, 125.8, 123.7, 122.6, 121.1; HRMS (ESI) *m/z* 373.1695 (M+H<sup>+</sup>), calc. for C<sub>27</sub>H<sub>20</sub>N<sub>2</sub> 373.1699.



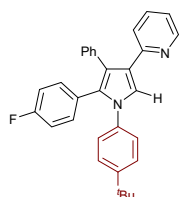

**2-(1-(4-(Tert-butyl)phenyl)-5-(4-fluorophenyl)-4-phenyl-1H-pyrrol-3-yl)pyridine (7):** yellow oil; 31.7 mg, 71% yield;  $^1\text{H}$  NMR (300 MHz,  $\text{CDCl}_3$ )  $\delta$  8.55 (d,  $J = 4.9$  Hz, 1H), 7.60 (s, 1H), 7.43 – 7.33 (m, 2H), 7.32 – 7.26 (m, 3H), 7.22 (td,  $J = 4.2, 2.5$  Hz, 3H), 7.17 (m, 2H), 7.08 (d,  $J = 4.5$  Hz, 1H), 7.05 – 6.99 (m, 1H), 6.93 (dd,  $J = 8.8, 2.6$  Hz, 2H), 6.88 – 6.81 (m, 1H), 6.81 – 6.75 (m, 1H), 1.31 (s, 9H);  $^{13}\text{C}$  NMR (75 MHz,  $\text{CDCl}_3$ )  $\delta$  154.2, 149.9, 149.2, 137.1, 135.8, 135.5, 132.6 (d,  $J = 8.1$  Hz), 131.1, 128.0, 126.3, 125.7, 125.3, 123.5, 123.0, 122.1, 120.4, 114.7 (d,  $J = 21.4$  Hz), 34.5, 31.3.;  $^{19}\text{F}$  NMR (471 MHz,  $\text{CDCl}_3$ )  $\delta$  -115.8; HRMS (ESI)  $m/z$  447.2226 ( $\text{M}+\text{H}^+$ ), calc. for  $\text{C}_{31}\text{H}_{27}\text{FN}_2$  447.2231.

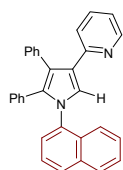

**2-(1-(Naphthalen-1-yl)-4,5-diphenyl-1H-pyrrol-3-yl)pyridine (8):** yellow solid; Mp: 159.7-160.4 °C; 32.1 mg, 76% yield;  $^1\text{H}$  NMR (300 MHz,  $\text{CDCl}_3$ )  $\delta$  8.55 (d,  $J = 4.3$  Hz, 1H), 7.90 – 7.76 (m, 3H), 7.62 (s, 1H), 7.48 (q,  $J = 5.6, 4.0$  Hz, 2H), 7.43 – 7.30 (m, 3H), 7.26 (s, 1H), 7.24 (s, 4H), 7.07 – 7.01 (m, 1H), 6.91 (m, 6H);  $^{13}\text{C}$  NMR (75 MHz,  $\text{CDCl}_3$ )  $\delta$  154.4, 149.2, 136.6, 135.8, 135.7, 134.0, 133.9, 131.7, 131.1, 130.8, 130.3, 128.3, 128.0, 127.9, 127.4, 127.0, 126.5, 126.4, 126.1, 125.9, 125.2, 124.9, 123.5, 122.4, 120.4; HRMS (ESI)  $m/z$  423.1851 ( $\text{M}+\text{H}^+$ ), calc. for  $\text{C}_{31}\text{H}_{22}\text{N}_2$  423.1856.

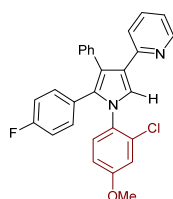

**2-(1-(2-Chloro-4-methoxyphenyl)-5-(4-fluorophenyl)-4-phenyl-1H-pyrrol-3-yl)pyridine (9):** yellow oil; 35.5 mg, 78% yield;  $^1\text{H}$  NMR (300 MHz,  $\text{CDCl}_3$ )  $\delta$  8.54 (d,  $J = 5.7$  Hz, 1H), 7.43 (s, 1H), 7.38 (td,  $J = 7.8, 1.9$  Hz, 1H), 7.25 – 7.10 (m, 6H), 7.04 – 7.00 (m, 1H), 6.95 – 6.84 (m, 4H), 6.80 – 6.69 (m, 3H), 3.79 (s, 3H);  $^{13}\text{C}$  NMR (75 MHz,  $\text{CDCl}_3$ )  $\delta$  161.6 (d,  $J = 246.6$  Hz), 159.9, 159.5, 154.2, 149.2, 135.7, 135.4, 132.9, 132.2 (d,  $J = 8.1$  Hz), 132.2, 131.0, 130.6, 130.3, 128.0, 127.7 (d,  $J = 3.4$  Hz), 126.2, 124.1, 123.9, 122.3, 122.0, 120.4, 114.9, 114.9 (d,  $J = 7.9$  Hz), 113.0, 55.6;  $^{19}\text{F}$  NMR (471 MHz,  $\text{CDCl}_3$ )  $\delta$  -114.9; HRMS (ESI)  $m/z$  455.1317 ( $\text{M}+\text{H}^+$ ), calc. for  $\text{C}_{28}\text{H}_{20}\text{ClFN}_2\text{O}$  455.1321.

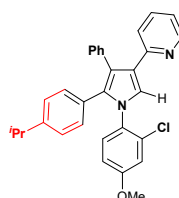

**2-(1-(2-Chloro-4-methoxyphenyl)-5-(4-isopropylphenyl)-4-phenyl-1H-pyrrol-3-yl)pyridine (10):** brown solid; Mp: 178.9-179.6 °C; 42.6 mg, 89% yield;  $^1\text{H}$  NMR (300 MHz,  $\text{CDCl}_3$ )  $\delta$  8.54 (d,  $J = 4.8$  Hz, 1H), 7.42 (s, 1H), 7.36 (td,  $J = 7.8, 1.8$  Hz, 1H), 7.24 – 7.16 (m, 5H), 7.09 (d,  $J = 8.8$  Hz, 1H), 7.03 – 6.98 (m, 1H), 6.95 (d,  $J = 2.8$  Hz, 1H), 6.87 (q,  $J = 8.1$  Hz, 5H), 6.69 (dd,  $J = 8.8, 2.8$  Hz, 1H), 3.79 (s, 3H), 2.76 (m, 1H), 1.14 (d,  $J = 6.9$  Hz, 6H);  $^{13}\text{C}$  NMR (75 MHz,  $\text{CDCl}_3$ )  $\delta$  159.3, 154.4, 149.2, 147.0, 135.7, 135.6, 133.3, 132.8, 130.7, 130.3, 128.8, 127.9, 126.0,

125.6, 124.1, 123.8, 122.4, 121.6, 120.3, 114.8, 112.9, 55.6, 33.5, 23.7; HRMS (ESI)  $m/z$  479.1880 ( $M+H^+$ ), calc. for  $C_{31}H_{27}ClN_2O$  479.1885.

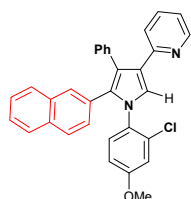

**2-(1-(2-Chloro-4-methoxyphenyl)-5-(naphthalen-2-yl)-4-phenyl-1H-pyrrol-3-yl)pyridine (11):** brown solid; Mp: 158.3-159.7 °C; 38.5 mg, 79% yield;  $^1H$  NMR (300 MHz,  $CDCl_3$ )  $\delta$  8.57 (d,  $J = 4.1$  Hz, 1H), 7.72 – 7.65 (m, 1H), 7.51 (d,  $J = 10.1$  Hz, 3H), 7.46 – 7.31 (m, 4H), 7.27 – 7.12 (m, 6H), 7.10 – 7.00 (m, 2H), 6.97 – 6.82 (m, 2H), 6.66 (dd,  $J = 8.8, 2.8$  Hz, 1H), 3.74 (s, 3H);

$^{13}C$  NMR (75 MHz,  $CDCl_3$ )  $\delta$  159.3, 154.3, 149.3, 135.6, 135.5, 133.1, 132.8, 132.8, 131.9, 131.1, 130.6, 130.6, 129.6, 129.2, 128.4, 128.0, 128.0, 127.4, 127.0, 126.2, 125.7, 125.6, 124.5, 124.1, 122.4, 120.4, 114.9, 113.0, 55.6; HRMS (ESI)  $m/z$  487.1570 ( $M+H^+$ ), calc. for  $C_{32}H_{23}ClN_2O$  487.1572.

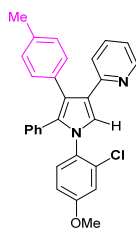

**2-(1-(2-Chloro-4-methoxyphenyl)-5-phenyl-4-(p-tolyl)-1H-pyrrol-3-yl)pyridine (12):** brown solid; Mp: 179.8-180.6 °C; 39.7 mg, 88% yield;  $^1H$  NMR (300 MHz,  $CDCl_3$ )  $\delta$  8.55 (d,  $J = 4.1$  Hz, 1H), 7.43 (s, 1H), 7.37 (td,  $J = 7.8, 1.8$  Hz, 1H), 7.14 – 7.00 (m, 9H), 6.99 – 6.93 (m, 3H), 6.90 (d,  $J = 8.0$  Hz, 1H), 6.69 (dd,  $J = 8.8, 2.8$  Hz, 1H), 3.77 (s, 3H), 2.32 (s, 3H);  $^{13}C$  NMR (75 MHz,  $CDCl_3$ )  $\delta$

159.3, 154.5, 149.2, 135.5, 135.5, 133.1, 132.7, 132.4, 131.8, 130.8, 130.6, 130.6, 128.7, 127.5, 126.5, 124.1, 124.0, 122.3, 121.8, 120.3, 114.8, 112.9, 55.6, 21.2; HRMS (ESI)  $m/z$  451.1568 ( $M+H^+$ ), calc. for  $C_{29}H_{23}ClN_2O$  451.1572.

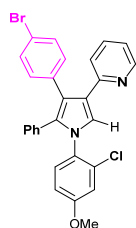

**2-(4-(4-Bromophenyl)-1-(2-chloro-4-methoxyphenyl)-5-phenyl-1H-pyrrol-3-yl)pyridine (13):** brown solid; Mp: 152.2-153.2 °C; 43.8 mg, 85% yield;  $^1H$  NMR (300 MHz,  $CDCl_3$ )  $\delta$  8.55 (d,  $J = 4.6$  Hz, 1H), 7.47 – 7.39 (m, 2H), 7.32 (d,  $J = 8.4$  Hz, 2H), 7.13 – 7.01 (m, 7H), 7.00 – 6.81 (m, 4H), 6.69 (dd,  $J = 8.8, 2.7$  Hz, 1H), 3.78 (s, 3H);  $^{13}C$  NMR (75 MHz,  $CDCl_3$ )  $\delta$  159.4, 154.1, 149.4,

135.7, 134.5, 133.3, 132.8, 132.6, 131.3, 131.1, 130.6, 130.6, 130.3, 127.7, 126.9, 124.3, 123.9, 122.4, 120.5, 120.1, 114.9, 112.9, 55.6; HRMS (ESI)  $m/z$  515.0519 ( $M+H^+$ ), calc. for  $C_{28}H_{20}BrClN_2O$  515.0521.

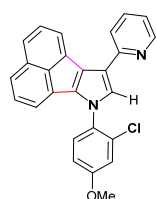

**7-(2-Chloro-4-methoxyphenyl)-9-(pyridin-2-yl)-7H-acenaphtho[1,2-b]pyrrole (14):** yellow oil; 30.6 mg, 75% yield;  $^1H$  NMR (300 MHz,  $CDCl_3$ )  $\delta$  8.75 (d,  $J = 5.1$  Hz, 1H), 8.30 (d,  $J = 6.8$  Hz, 1H), 7.82 – 7.74 (m, 2H), 7.65 (dd,  $J = 8.2, 4.5$  Hz, 2H), 7.59 – 7.51 (m, 2H), 7.38 (s, 1H), 7.35 – 7.30 (m, 1H), 7.17 (t,  $J = 4.1$  Hz, 2H), 7.04 – 6.93 (m, 2H), 3.92 (s, 3H);  $^{13}C$  NMR (75 MHz,  $CDCl_3$ )  $\delta$  160.0, 154.2,

149.4, 139.8, 136.5, 133.5, 132.8, 131.7, 130.2, 129.4, 129.1, 128.9, 127.9, 126.7, 125.9,

125.4, 123.0, 120.7, 120.2, 118.1, 115.7, 113.6, 55.9; HRMS (ESI)  $m/z$  409.1097 ( $M+H^+$ ), calc. for  $C_{26}H_{17}ClN_2O$  409.1102.

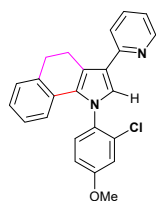

**1-(2-Chloro-4-methoxyphenyl)-3-(pyridin-2-yl)-4,5-dihydro-1H-benzo[ghi]indole (15):** yellow oil; 29.0 mg, 75% yield;  $^1H$  NMR (300 MHz,  $CDCl_3$ )  $\delta$  8.61 (d,  $J = 4.7$  Hz, 1H), 7.68 (t,  $J = 7.7$  Hz, 1H), 7.47 (d,  $J = 8.0$  Hz, 1H), 7.34 (d,  $J = 8.7$  Hz, 1H), 7.28 (s, 1H), 7.22 (d,  $J = 7.3$  Hz, 1H), 7.16 – 7.07 (m, 2H), 7.01 (t,  $J = 7.4$  Hz, 1H), 6.90 (t,  $J = 7.7$  Hz, 2H), 6.41 (d,  $J = 7.7$  Hz, 1H), 3.89 (s, 3H), 3.11 (dd,  $J = 7.9, 5.6$  Hz, 2H), 2.99 (t,  $J = 7.2$  Hz, 2H);  $^{13}C$  NMR (75 MHz,  $CDCl_3$ )  $\delta$  159.8, 154.5, 149.1, 136.5, 135.9, 132.8, 131.3, 130.3, 130.0, 129.3, 128.0, 126.2, 125.1, 124.8, 121.1, 120.6, 120.3, 120.0, 115.4, 113.5, 55.8, 30.7, 21.9; HRMS (ESI)  $m/z$  387.1253 ( $M+H^+$ ), calc. for  $C_{24}H_{19}ClN_2O$  387.1259.

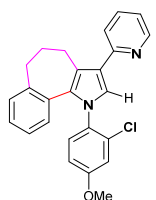

**1-(2-Chloro-4-methoxyphenyl)-3-(pyridin-2-yl)-1,4,5,6-tetrahydrobenzo[6,7]cyclohepta[1,2-b]pyrrole (16):** yellow oil; 32.9 mg, 82% yield;  $^1H$  NMR (300 MHz,  $CDCl_3$ )  $\delta$  8.63 (d,  $J = 4.5$  Hz, 1H), 7.71 (t,  $J = 7.7$  Hz, 1H), 7.52 (d,  $J = 8.0$  Hz, 1H), 7.37 – 7.27 (m, 3H), 7.17 – 7.07 (m, 2H), 6.97 (t,  $J = 7.5$  Hz, 1H), 6.92 (d,  $J = 2.5$  Hz, 1H), 6.83 (dd,  $J = 8.7, 2.4$  Hz, 1H), 6.63 (d,  $J = 7.6$  Hz, 1H), 3.81 (s, 3H), 2.80 (m, 3H), 2.60 (dd,  $J = 13.3, 6.8$  Hz, 1H), 2.36 (m, 2H);  $^{13}C$  NMR (75 MHz,  $CDCl_3$ )  $\delta$  159.3, 154.4, 149.1, 141.2, 136.8, 132.8, 132.4, 130.6, 130.0, 129.4, 127.1, 126.1, 125.5, 123.3, 121.9, 121.3, 120.3, 115.2, 113.3, 55.7, 34.4, 32.8, 21.6; HRMS (ESI)  $m/z$  401.1412 ( $M+H^+$ ), calc. for  $C_{25}H_{21}ClN_2O$  401.1415.

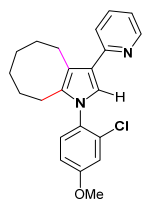

**1-(2-Chloro-4-methoxyphenyl)-3-(pyridin-2-yl)-4,5,6,7,8,9-hexahydro-1H-cycloocta[b]pyrrole (17):** yellow oil; 31.6 mg, 86% yield;  $^1H$  NMR (300 MHz,  $CDCl_3$ )  $\delta$  8.57 (d,  $J = 4.7$  Hz, 1H), 7.65 (t,  $J = 7.4$  Hz, 1H), 7.51 (s, 1H), 7.25 (d,  $J = 6.6$  Hz, 1H), 7.21 – 7.11 (m, 1H), 7.05 (m, 2H), 6.86 (dd,  $J = 8.6, 2.3$  Hz, 1H), 3.85 (s, 3H), 2.96 (p,  $J = 6.5$  Hz, 2H), 2.60 – 2.32 (m, 2H), 1.91 – 1.61 (m, 3H), 1.55 – 1.32 (m, 5H);  $^{13}C$  NMR (75 MHz,  $CDCl_3$ )  $\delta$  159.7, 155.2, 148.6, 136.6, 133.6, 133.1, 130.5, 130.3, 121.6, 121.1, 119.8, 118.3, 115.1, 113.0, 55.8, 30.5, 29.7, 26.1, 25.8, 23.4; HRMS (ESI)  $m/z$  367.1569 ( $M+H^+$ ), calc. for  $C_{22}H_{23}ClN_2O$  367.1572.

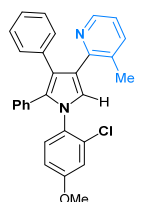

**2-(1-(2-Chloro-4-methoxyphenyl)-4,5-diphenyl-1H-pyrrol-3-yl)-3-methylpyridine (18):** brown oil; 39.7 mg, 88% yield;  $^1H$  NMR (300 MHz,  $CDCl_3$ )  $\delta$  8.50 (d,  $J = 4.5$  Hz, 1H), 7.41 (d,  $J = 7.0$  Hz, 1H), 7.11 (s, 4H), 7.02 (m, 7H), 6.97 (d,  $J = 2.4$  Hz, 1H), 6.95 – 6.88 (m, 2H), 6.66 (dd,  $J = 8.8, 2.6$  Hz, 1H), 3.79 (s, 3H), 1.91 (s, 3H);  $^{13}C$  NMR (75 MHz,  $CDCl_3$ )  $\delta$  160.3, 156.1, 149.1, 137.8, 136.8, 132.0, 130.5,

130.3, 129.0, 128.5, 128.2, 126.9, 126.5, 125.3, 123.7, 123.6, 122.8, 122.6, 121.0, 117.1, 113.0, 55.3, 21.4; HRMS (ESI)  $m/z$  451.1568 ( $M+H^+$ ), calc. for  $C_{29}H_{23}ClN_2O$  451.1572.

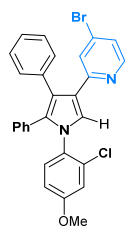

**4-Bromo-2-(1-(2-chloro-4-methoxyphenyl)-4,5-diphenyl-1H-pyrrol-3-yl)pyridine (19):** brown oil; 44.4 mg, 86% yield;  $^1H$  NMR (300 MHz,  $CDCl_3$ )  $\delta$  8.34 (d,  $J = 5.2$  Hz, 1H), 7.49 (s, 1H), 7.24 (s, 2H), 7.21 – 7.16 (m, 3H), 7.10 (m, 5H), 7.02 (s, 1H), 6.97 – 6.91 (m, 3H), 6.71 (d,  $J = 8.8$  Hz, 1H), 3.79 (d,  $J = 1.3$  Hz, 3H);  $^{13}C$  NMR (75 MHz,  $CDCl_3$ )  $\delta$  159.5, 155.6, 149.6, 134.9, 133.5, 132.8, 131.4, 130.9, 130.6, 130.5, 130.4, 128.1, 127.6, 126.8, 126.5, 125.4, 124.8, 123.5, 122.0, 114.9, 113.0, 55.7; HRMS (ESI)  $m/z$  515.0516 ( $M+H^+$ ), calc. for  $C_{28}H_{20}BrClN_2O$  515.0521.

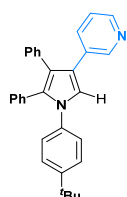

**3-(1-(4-(tert-butyl)phenyl)-4,5-diphenyl-1H-pyrrol-3-yl)pyridine (20):** yellow oil; 33.0 mg, 77% yield;  $^1H$  NMR (300 MHz,  $CDCl_3$ )  $\delta$  8.57 (s, 1H), 8.40 (d,  $J = 4.7$  Hz, 1H), 7.40 (d,  $J = 7.9$  Hz, 1H), 7.31 (d,  $J = 8.3$  Hz, 2H), 7.17 (d,  $J = 3.2$  Hz, 4H), 7.14 – 7.04 (m, 8H), 6.97 (d,  $J = 7.6$  Hz, 2H), 1.31 (d,  $J = 1.1$  Hz, 9H);  $^{13}C$  NMR (75 MHz,  $CDCl_3$ )  $\delta$  150.0, 148.5, 146.2, 137.2, 135.8, 134.9, 132.0, 131.6, 131.0, 130.9, 128.1, 127.7, 126.8, 126.1, 125.8, 125.3, 123.1, 122.9, 121.5, 120.7, 34.6, 31.3; HRMS (ESI)  $m/z$  429.2322 ( $M+H^+$ ), calc. for  $C_{31}H_{28}N_2$  429.2325.

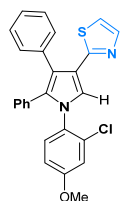

**2-(1-(2-Chloro-4-methoxyphenyl)-4,5-diphenyl-1H-pyrrol-3-yl)thiazole (21):** yellow solid; Mp: 173.6-174.5 °C; 35.9 mg, 81% yield;  $^1H$  NMR (300 MHz,  $CDCl_3$ )  $\delta$  7.69 (d,  $J = 3.3$  Hz, 1H), 7.53 (s, 1H), 7.29 (d,  $J = 8.5$  Hz, 5H), 7.17 (d,  $J = 8.8$  Hz, 1H), 7.08 – 7.01 (m, 4H), 6.95 (dd,  $J = 6.8, 2.3$  Hz, 3H), 6.73 (dd,  $J = 8.8, 2.8$  Hz, 1H), 3.79 (s, 3H);  $^{13}C$  NMR (75 MHz,  $CDCl_3$ )  $\delta$  163.0, 159.5, 141.7, 134.4, 133.4, 132.7, 131.7, 131.1, 130.4, 130.3, 130.2, 128.1, 127.6, 127.0, 126.8, 123.2, 122.4, 118.8, 117.2, 115.0, 113.1, 55.7; HRMS (ESI)  $m/z$  443.0976 ( $M+H^+$ ), calc. for  $C_{26}H_{19}ClN_2OS$  443.0980.

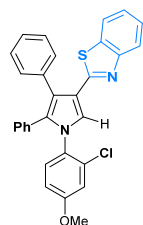

**2-(1-(2-Chloro-4-methoxyphenyl)-4,5-diphenyl-1H-pyrrol-3-yl)benzo[d]thiazole (22):** yellow oil; 38.9 mg, 79% yield;  $^1H$  NMR (300 MHz,  $CDCl_3$ )  $\delta$  7.95 (d,  $J = 10.2$  Hz, 1H), 7.69 (d,  $J = 7.9$  Hz, 2H), 7.44 – 7.29 (m, 6H), 7.20 (d,  $J = 8.9$  Hz, 2H), 7.05 (dd,  $J = 8.9, 5.1$  Hz, 3H), 7.00 – 6.89 (m, 3H), 6.75 (dd,  $J = 8.8, 2.4$  Hz, 1H), 3.81 (s, 3H);  $^{13}C$  NMR (75 MHz,  $CDCl_3$ )  $\delta$  163.4, 159.7, 152.8, 134.1, 133.8, 133.4, 132.8, 131.9, 130.9, 130.4, 130.3, 130.1, 128.7, 127.6, 127.3, 126.9, 126.3, 125.7, 124.5, 123.9, 122.9, 122.5, 122.0, 121.2, 115.1, 113.1, 55.7; HRMS (ESI)  $m/z$  493.1133 ( $M+H^+$ ), calc. for  $C_{30}H_{21}ClN_2OS$  493.1136.

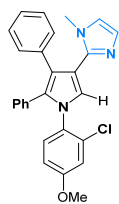

**2-(1-(2-Chloro-4-methoxyphenyl)-4,5-diphenyl-1H-pyrrol-3-yl)-1-methyl-1H-imidazole (23):** yellow oil; 36.1 mg, 82% yield;  $^1\text{H}$  NMR (300 MHz,  $\text{CDCl}_3$ )  $\delta$  7.32 (dd,  $J = 9.0, 5.5$  Hz, 2H), 7.18 – 7.09 (m, 6H), 7.07 – 6.98 (m, 3H), 6.96 (dd,  $J = 6.8, 3.1$  Hz, 3H), 6.85 (s, 1H), 6.66 (dd,  $J = 8.4, 2.2$  Hz, 1H), 3.79 (s, 3H), 3.02 (s, 3H);  $^{13}\text{C}$  NMR (75 MHz,  $\text{CDCl}_3$ )  $\delta$  159.4, 143.7, 135.2, 132.9, 131.7, 131.5, 130.8, 130.7, 130.2, 129.4, 128.0, 127.9, 127.8, 127.0, 125.7, 125.0, 122.8, 120.7, 114.9, 113.3, 112.9, 55.6, 33.1; HRMS (ESI)  $m/z$  440.1519 ( $\text{M}+\text{H}^+$ ), calc. for  $\text{C}_{27}\text{H}_{22}\text{ClN}_3\text{O}$  440.1524.

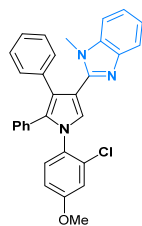

**2-(1-(2-Chloro-4-methoxyphenyl)-4,5-diphenyl-1H-pyrrol-3-yl)-1-methyl-1H-benzo[d]imidazole (24):** yellow oil; 37.7 mg, 77% yield;  $^1\text{H}$  NMR (300 MHz,  $\text{CDCl}_3$ )  $\delta$  7.82 (dd,  $J = 6.7, 1.7$  Hz, 1H), 7.30 (s, 1H), 7.29 – 7.23 (m, 2H), 7.21 (t,  $J = 3.0$  Hz, 1H), 7.13 (dd,  $J = 5.1, 1.9$  Hz, 3H), 7.11 – 7.05 (m, 5H), 7.01 (m, 3H), 6.96 (d,  $J = 2.8$  Hz, 1H), 6.69 (dd,  $J = 8.8, 2.8$  Hz, 1H), 3.78 (s, 3H), 3.14 (s, 3H);  $^{13}\text{C}$  NMR (75 MHz,  $\text{CDCl}_3$ )  $\delta$  159.6, 150.3, 143.1, 136.0, 135.0, 132.9, 132.2, 131.3, 130.8, 130.7, 130.0, 129.5, 128.2, 127.9, 127.1, 125.9, 125.8, 122.7, 121.9, 121.8, 119.3, 114.9, 113.2, 112.9, 109.3, 55.6, 30.5; HRMS (ESI)  $m/z$  490.1675 ( $\text{M}+\text{H}^+$ ), calc. for  $\text{C}_{31}\text{H}_{24}\text{ClN}_3\text{O}$  490.1681.

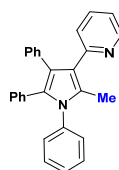

**2-(2-Methyl-1,4,5-triphenyl-1H-pyrrol-3-yl)pyridine (25):** yellow oil; 33.6 mg, 87% yield;  $^1\text{H}$  NMR (300 MHz,  $\text{CDCl}_3$ )  $\delta$  8.63 – 8.49 (m, 1H), 7.51 – 7.44 (m, 1H), 7.33 (s, 1H), 7.25 – 7.18 (m, 4H), 7.18 – 6.96 (m, 12H), 2.34 (s, 3H);  $^{13}\text{C}$  NMR (75 MHz,  $\text{CDCl}_3$ )  $\delta$  156.2, 149.2, 136.9, 133.4, 132.0, 130.3, 128.5, 127.9, 126.9, 126.5, 125.8, 123.7, 122.6, 121.1, 116.2, 108.5, 105.9, 12.9; HRMS (ESI)  $m/z$  387.1851 ( $\text{M}+\text{H}^+$ ), calc. for  $\text{C}_{28}\text{H}_{22}\text{N}_2$  387.1856.

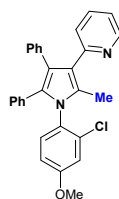

**2-(1-(2-Chloro-4-methoxyphenyl)-2-methyl-4,5-diphenyl-1H-pyrrol-3-yl)pyridine (26):** gray solid; Mp: 189.4-190.6 °C; 39.2 mg, 87% yield;  $^1\text{H}$  NMR (300 MHz,  $\text{CDCl}_3$ )  $\delta$  8.65 (d,  $J = 4.5$  Hz, 1H), 7.48 – 7.38 (m, 1H), 7.10 (d,  $J = 3.0$  Hz, 2H), 7.08 (s, 3H), 7.04 (dd,  $J = 6.7, 3.4$  Hz, 4H), 7.02 – 6.98 (m, 3H), 6.97 (d,  $J = 2.4$  Hz, 1H), 6.90 (d,  $J = 7.9$  Hz, 1H), 6.71 (dd,  $J = 8.7, 2.3$  Hz, 1H), 3.79 (s, 3H), 2.25 (s, 3H);  $^{13}\text{C}$  NMR (75 MHz,  $\text{CDCl}_3$ )  $\delta$  160.3, 156.1, 149.1, 136.9, 132.0, 130.5, 130.2, 128.5, 127.5, 126.8, 126.5, 123.7, 123.7, 122.8, 122.6, 121.1, 117.1, 116.1, 113.0, 108.4, 105.8, 55.3, 12.8.; HRMS (ESI)  $m/z$  451.1566 ( $\text{M}+\text{H}^+$ ), calc. for  $\text{C}_{29}\text{H}_{23}\text{ClN}_2\text{O}$  451.1572.

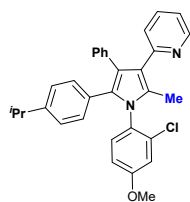

**2-(1-(2-Chloro-4-methoxyphenyl)-5-(4-isopropylphenyl)-2-methyl-4-phenyl-1H-pyrrol-3-yl)pyridine (27):** gray solid; Mp: 179.4-180.3 °C; 42.4 mg, 86% yield; <sup>1</sup>H NMR (300 MHz, CDCl<sub>3</sub>) δ 8.63 (d, *J* = 5.2 Hz, 1H), 7.39 (d, *J* = 7.5 Hz, 1H), 7.19 (m, 2H), 7.07 (s, 2H), 7.03 (d, *J* = 3.8 Hz, 2H), 6.97 (dd, *J* = 6.8, 2.9 Hz, 2H), 6.89 (d, *J* = 5.3 Hz, 5H), 6.72 (dd, *J* = 8.7, 2.8 Hz, 1H), 3.79 (s, 3H), 2.83 – 2.69 (m, 1H), 2.22 (s, 3H), 1.14 (d, *J* = 6.9 Hz, 6H); <sup>13</sup>C NMR (75 MHz, CDCl<sub>3</sub>) δ 160.4, 156.2, 149.1, 148.8, 136.8, 131.1, 130.5, 128.3, 127.3, 126.4, 125.8, 125.7, 124.9, 124.6, 123.7, 123.6, 122.8, 121.1, 117.2, 116.2, 113.0, 108.4, 105.8, 55.3, 34.1, 23.9, 12.8; HRMS (ESI) *m/z* 493.2037 (M+H<sup>+</sup>), calc. for C<sub>32</sub>H<sub>29</sub>ClN<sub>2</sub>O 493.2041.

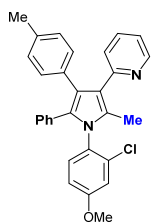

**2-(1-(2-Chloro-4-methoxyphenyl)-2-methyl-5-phenyl-4-(p-tolyl)-1H-pyrrol-3-yl)pyridine (28):** brown solid; Mp: 169.4-170.2 °C; 40.5 mg, 87% yield; <sup>1</sup>H NMR (300 MHz, CDCl<sub>3</sub>) δ 8.65 (d, *J* = 4.5 Hz, 1H), 7.44 (t, *J* = 7.1 Hz, 1H), 7.11 – 7.02 (m, 6H), 6.96 (dd, *J* = 10.3, 7.9 Hz, 3H), 6.89 (s, 4H), 6.71 (dd, *J* = 8.7, 2.4 Hz, 1H), 3.78 (s, 3H), 2.28 – 2.21 (m, 6H); <sup>13</sup>C NMR (75 MHz, CDCl<sub>3</sub>) δ 160.3, 156.1, 149.1, 137.8, 136.8, 132.0, 130.5, 130.3, 129.0, 128.5, 128.2, 127.5, 126.9, 126.5, 125.3, 123.7, 123.6, 122.8, 122.6, 121.0, 117.1, 116.1, 113.0, 108.4, 105.8, 55.3, 21.4, 12.8; HRMS (ESI) *m/z* 465.1723 (M+H<sup>+</sup>), calc. for C<sub>30</sub>H<sub>25</sub>ClN<sub>2</sub>O 465.1728.

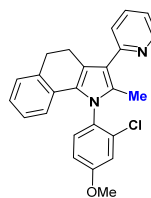

**1-(2-Chloro-4-methoxyphenyl)-2-methyl-3-(pyridin-2-yl)-4,5-dihydro-1H-benzo[g]indole (29):** yellow oil; 32.5 mg, 81% yield; <sup>1</sup>H NMR (300 MHz, CDCl<sub>3</sub>) δ 8.68 (d, *J* = 4.5 Hz, 1H), 7.71 (t, *J* = 7.0 Hz, 1H), 7.34 (d, *J* = 7.9 Hz, 1H), 7.29 (s, 1H), 7.15 (dd, *J* = 9.8, 5.2 Hz, 3H), 6.98 – 6.83 (m, 3H), 6.32 (d, *J* = 7.6 Hz, 1H), 3.90 (s, 3H), 2.91 (t, *J* = 4.7 Hz, 4H), 2.23 (s, 3H); <sup>13</sup>C NMR (75 MHz, CDCl<sub>3</sub>) δ 160.1, 156.2, 149.1, 135.9, 134.4, 131.2, 130.3, 129.7, 128.8, 128.0, 126.2, 124.4, 124.0, 120.8, 120.0, 119.4, 115.4, 114.6, 114.3, 113.7, 55.8, 30.8, 21.4, 11.2; HRMS (ESI) *m/z* 401.1411 (M+H<sup>+</sup>), calc. for C<sub>25</sub>H<sub>21</sub>ClN<sub>2</sub>O 401.1415.

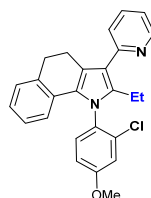

**1-(2-Chloro-4-methoxyphenyl)-2-ethyl-3-(pyridin-2-yl)-4,5-dihydro-1H-benzo[g]indole (30):** yellow oil; 35.7 mg, 86% yield; <sup>1</sup>H NMR (300 MHz, CDCl<sub>3</sub>) δ 8.68 (d, *J* = 4.4 Hz, 1H), 7.71 (t, *J* = 8.0 Hz, 1H), 7.35 (d, *J* = 8.8 Hz, 2H), 7.14 (m, 3H), 6.93 (dd, *J* = 7.5, 4.3 Hz, 2H), 6.85 (t, *J* = 7.4 Hz, 1H), 6.27 (d, *J* = 7.8 Hz, 1H), 3.91 (s, 3H), 2.88 (m, 4H), 2.67 (m, 2H), 0.96 (t, *J* = 7.4 Hz, 3H); <sup>13</sup>C NMR (75 MHz, CDCl<sub>3</sub>) δ 160.1, 156.6, 149.2, 137.0, 136.0, 134.8, 131.5, 130.1, 129.7, 128.0, 126.2, 124.4, 123.8, 120.8, 120.1, 119.4, 115.4, 113.5, 55.8, 30.8, 21.4, 18.4, 14.6; HRMS (ESI) *m/z* 415.1565 (M+H<sup>+</sup>), calc. for C<sub>26</sub>H<sub>23</sub>ClN<sub>2</sub>O 415.1572.

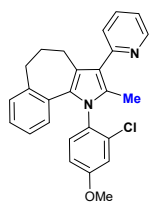

**1-(2-Chloro-4-methoxyphenyl)-2-methyl-3-(pyridin-2-yl)-1,4,5,6-tetrahydrobenzo[6,7]cyclohepta[1,2-b]pyrrole (31):** yellow oil; 34.9 mg, 84% yield;  $^1\text{H}$  NMR (300 MHz,  $\text{CDCl}_3$ )  $\delta$  8.70 (d,  $J = 4.2$  Hz, 1H), 7.72 (t,  $J = 7.5$  Hz, 1H), 7.40 (d,  $J = 7.8$  Hz, 1H), 7.23 (d,  $J = 5.2$  Hz, 1H), 7.21 – 7.08 (m, 2H), 7.06 – 6.91 (m, 3H), 6.86 – 6.77 (m, 1H), 6.68 (d,  $J = 7.5$  Hz, 1H), 3.82 (s, 3H), 2.75 (m, 2H), 2.50 (t,  $J = 7.1$  Hz, 2H), 2.32 (dt,  $J = 10.4, 4.9$  Hz, 2H), 2.21 (s, 3H);  $^{13}\text{C}$  NMR (75 MHz,  $\text{CDCl}_3$ )  $\delta$  159.6, 155.9, 149.4, 141.3, 135.7, 134.2, 133.3, 131.4, 130.2, 129.7, 129.6, 129.3, 126.9, 125.5, 124.3, 121.6, 121.3, 120.0, 115.2, 113.3, 55.7, 34.8, 33.0, 21.4, 11.4; HRMS (ESI)  $m/z$  415.1566 ( $\text{M}+\text{H}^+$ ), calc. for  $\text{C}_{26}\text{H}_{23}\text{ClN}_2\text{O}$  415.1572.

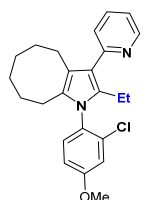

**1-(2-Chloro-4-methoxyphenyl)-2-ethyl-3-(pyridin-2-yl)-4,5,6,7,8,9-hexahydro-1H-cycloocta[b]pyrrole (32):** yellow oil; 30.8 mg, 78% yield;  $^1\text{H}$  NMR (300 MHz,  $\text{CDCl}_3$ )  $\delta$  8.65 (d,  $J = 4.8$  Hz, 1H), 7.65 (td,  $J = 7.7, 1.8$  Hz, 1H), 7.35 (d,  $J = 7.9$  Hz, 1H), 7.23 (d,  $J = 8.7$  Hz, 1H), 7.09 (dd,  $J = 6.6, 1.6$  Hz, 1H), 7.06 (d,  $J = 2.7$  Hz, 1H), 6.89 (dd,  $J = 8.7, 2.8$  Hz, 1H), 3.86 (s, 3H), 2.83 – 2.56 (m, 2H), 2.61 – 2.32 (m, 4H), 1.62 (t,  $J = 8.8$  Hz, 2H), 1.51 – 1.34 (m, 6H), 0.84 (t,  $J = 7.5$  Hz, 3H);  $^{13}\text{C}$  NMR (75 MHz,  $\text{CDCl}_3$ )  $\delta$  159.7, 156.6, 149.2, 135.6, 134.8, 132.8, 131.7, 129.8, 129.3, 124.1, 120.0, 119.7, 118.1, 115.0, 113.0, 55.7, 31.0, 29.4, 26.1, 25.8, 23.5, 23.3, 18.5, 14.9; HRMS (ESI)  $m/z$  395.1879 ( $\text{M}+\text{H}^+$ ), calc. for  $\text{C}_{24}\text{H}_{27}\text{ClN}_2\text{O}$  395.1885.

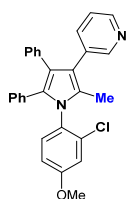

**3-(1-(2-Chloro-4-methoxyphenyl)-2-methyl-4,5-diphenyl-1H-pyrrol-3-yl)pyridine (33):** yellow oil; 36.9 mg, 82% yield;  $^1\text{H}$  NMR (300 MHz,  $\text{CDCl}_3$ )  $\delta$  8.53 (s, 1H), 8.43 (d,  $J = 4.4$  Hz, 1H), 7.48 (d,  $J = 7.8$  Hz, 1H), 7.22 (dd,  $J = 7.8, 5.1$  Hz, 1H), 7.16 (d,  $J = 8.8$  Hz, 1H), 7.13 – 7.04 (m, 6H), 7.02 (d,  $J = 5.3$  Hz, 2H), 6.96 (dd,  $J = 8.0, 3.4$  Hz, 3H), 6.75 (dd,  $J = 8.5, 2.4$  Hz, 1H), 3.80 (s, 3H), 2.10 (s, 3H);  $^{13}\text{C}$  NMR (75 MHz,  $\text{CDCl}_3$ )  $\delta$  159.8, 149.4, 145.0, 139.1, 134.8, 134.5, 132.9, 131.9, 131.5, 130.8, 129.2, 128.8, 127.8, 127.6, 126.7, 125.6, 123.2, 122.1, 117.2, 115.0, 113.1, 55.7, 11.1; HRMS (ESI)  $m/z$  451.1567 ( $\text{M}+\text{H}^+$ ), calc. for  $\text{C}_{29}\text{H}_{23}\text{ClN}_2\text{O}$  451.1572.

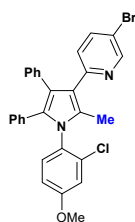

**5-Bromo-2-(1-(2-chloro-4-methoxyphenyl)-2-methyl-4,5-diphenyl-1H-pyrrol-3-yl)pyridine (34):** white solid; Mp: 141.2–142.3 °C; 46.6 mg, 88% yield;  $^1\text{H}$  NMR (300 MHz,  $\text{CDCl}_3$ )  $\delta$  8.69 (d,  $J = 2.0$  Hz, 1H), 7.52 (dd,  $J = 8.4, 2.0$  Hz, 1H), 7.36 (t,  $J = 7.6$  Hz, 1H), 7.28 (d,  $J = 2.1$  Hz, 1H), 7.11 (d,  $J = 5.6$  Hz, 3H), 7.05 (dd,  $J = 7.8, 4.1$  Hz, 5H), 7.00 – 6.99 (m, 1H), 6.97 (d,  $J = 3.0$  Hz, 1H), 6.79 – 6.69 (m, 2H), 3.79 (s, 3H), 2.24 (s, 3H);  $^{13}\text{C}$  NMR (75 MHz,  $\text{CDCl}_3$ )  $\delta$  159.7, 158.0, 150.1, 138.9, 138.6, 136.5, 135.3, 134.4, 132.8, 132.0, 131.6, 130.8, 129.2, 129.0, 128.8,

128.4, 128.2, 127.8, 127.6, 127.2, 126.6, 125.6, 125.3, 122.1, 117.0, 114.9, 113.1, 55.6, 11.2; HRMS (ESI)  $m/z$  529.0673 ( $M+H^+$ ), calc. for  $C_{29}H_{22}BrClN_2O$  529.0677.

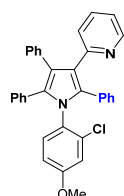

**2-(1-(2-Chloro-4-methoxyphenyl)-2,4,5-triphenyl-1H-pyrrol-3-yl)pyridine**

**(35):** yellow oil; 41.0 mg, 85 % yield;  $^1H$  NMR (300 MHz,  $CDCl_3$ )  $\delta$  8.41 (d,  $J$  = 3.7 Hz, 1H), 7.40 (td,  $J$  = 7.7, 1.8 Hz, 1H), 7.07 (m, 10H), 6.99 (m, 8H), 6.75 (d,  $J$  = 2.7 Hz, 1H), 6.62 (dd,  $J$  = 8.7, 2.8 Hz, 1H), 3.71 (s, 3H);  $^{13}C$  NMR (75 MHz,  $CDCl_3$ )  $\delta$  159.3, 155.4, 149.0, 135.2, 135.1, 134.4, 133.5, 132.4, 132.2, 132.1, 131.9, 131.1, 130.8, 130.7, 129.4, 127.5, 127.4, 127.4, 126.6, 125.9, 125.3, 122.9, 122.8, 120.4, 114.4, 112.7, 55.5; HRMS (ESI)  $m/z$  513.1724 ( $M+H^+$ ), calc. for  $C_{34}H_{25}ClN_2O$  513.1728.

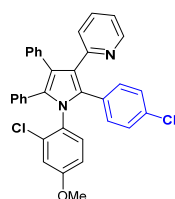

**2-(1-(2-Chloro-4-methoxyphenyl)-2-(4-chlorophenyl)-4,5-diphenyl-1H-pyrrol-3-yl)pyridine**

**(36):** brown oil; 44.3 mg, 81% yield;  $^1H$  NMR (300 MHz,  $CDCl_3$ )  $\delta$  8.48 (d,  $J$  = 3.7 Hz, 1H), 7.72 – 7.38 (m, 2H), 7.11 (m, 9H), 7.04 (s, 2H), 7.01 – 6.92 (m, 5H), 6.76 (d,  $J$  = 2.4 Hz, 1H), 6.63 (dd,  $J$  = 8.7, 2.6 Hz, 1H), 3.74 (s, 3H);  $^{13}C$  NMR (75 MHz,  $CDCl_3$ )  $\delta$  160.5, 156.2, 149.2, 136.9, 132.1, 130.6, 130.4, 129.8, 128.7, 128.6, 127.0, 126.6, 126.5, 123.8, 123.7, 122.9, 122.7, 121.1, 117.3, 113.1, 55.4; HRMS (ESI)  $m/z$  547.1334 ( $M+H^+$ ), calc. for  $C_{34}H_{24}Cl_2N_2O$  547.1339.

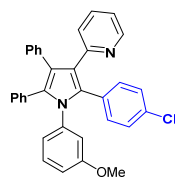

**2-(2-(4-Chlorophenyl)-1-(3-methoxyphenyl)-4,5-diphenyl-1H-pyrrol-3-yl)pyridine**

**(37):** yellow oil; 42.6 mg, 83% yield;  $^1H$  NMR (300 MHz,  $CDCl_3$ )  $\delta$  8.45 (d,  $J$  = 4.5 Hz, 1H), 7.55 – 7.40 (m, 1H), 7.06 (m, 11H), 6.94 (d,  $J$  = 6.1 Hz, 4H), 6.87 (d,  $J$  = 8.3 Hz, 2H), 6.75 – 6.69 (m, 1H), 6.51 (d,  $J$  = 7.9 Hz, 1H), 6.44 (s, 1H), 3.52 (s, 3H);  $^{13}C$  NMR (75 MHz,  $CDCl_3$ )  $\delta$  160.3, 156.1, 149.1, 136.8, 134.2, 133.4, 132.0, 130.5, 130.3, 129.6, 128.5, 128.5, 127.8, 126.9, 126.5, 126.4, 125.8, 123.7, 123.6, 122.8, 122.6, 121.0, 117.1, 113.0, 55.3; HRMS (ESI)  $m/z$  513.1724 ( $M+H^+$ ), calc. for  $C_{34}H_{25}ClN_2O$  513.1728.

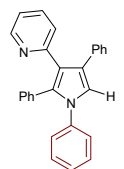

**2-(1,2,4-Triphenyl-1H-pyrrol-3-yl)pyridine**

**(38):** yellow oil; 32.9 mg, 88 % yield;  $^1H$  NMR (300 MHz,  $CDCl_3$ )  $\delta$  8.55 (d,  $J$  = 4.6 Hz, 1H), 7.45 (t,  $J$  = 7.4 Hz, 1H), 7.29 (d,  $J$  = 7.7 Hz, 2H), 7.22 (d,  $J$  = 4.1 Hz, 4H), 7.19 – 7.13 (m, 4H), 7.13 – 7.07 (m, 4H), 7.03 (d,  $J$  = 7.6 Hz, 4H);  $^{13}C$  NMR (75 MHz,  $CDCl_3$ )  $\delta$  155.3, 149.0, 140.0, 135.0, 132.7, 131.6, 130.9, 128.9, 128.2, 128.1, 127.7, 126.8, 126.7, 126.1, 125.9, 125.8, 125.3, 121.5, 120.9; HRMS (ESI)  $m/z$  373.1694 ( $M+H^+$ ), calc. for  $C_{27}H_{20}N_2$  373.1699.



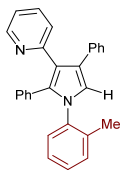

**2-(2,4-Diphenyl-1-(o-tolyl)-1H-pyrrol-3-yl)pyridine (39):** yellow oil; 31.3 mg, 81% yield;  $^1\text{H}$  NMR (300 MHz,  $\text{CDCl}_3$ )  $\delta$  8.55 (d,  $J = 5.0$  Hz, 1H), 7.50 (s, 1H), 7.41 (t,  $J = 7.8$  Hz, 1H), 7.29 (s, 1H), 7.26 (s, 2H), 7.21 (q,  $J = 3.7, 3.0$  Hz, 5H), 7.15 (t,  $J = 6.9$  Hz, 2H), 7.02 (p,  $J = 5.8$  Hz, 4H), 6.88 (d,  $J = 8.2$  Hz, 2H), 2.00 (s, 3H);  $^{13}\text{C}$  NMR (75 MHz,  $\text{CDCl}_3$ )  $\delta$  156.2, 149.2, 137.8, 136.9, 132.0, 130.3, 129.0, 128.5, 128.2, 126.9, 126.5, 125.3, 123.7, 122.6, 121.1, 21.4; HRMS (ESI)  $m/z$  387.1851 ( $\text{M}+\text{H}^+$ ), calc. for  $\text{C}_{28}\text{H}_{22}\text{N}_2$  387.1856.

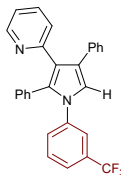

**2-(2,4-Diphenyl-1-(3-(trifluoromethyl)phenyl)-1H-pyrrol-3-yl)pyridine (40):** green solid; Mp: 164.2-164.9 °C; 34.8 mg, 79 % yield;  $^1\text{H}$  NMR (300 MHz,  $\text{CDCl}_3$ )  $\delta$  8.57 (d,  $J = 4.7$  Hz, 1H), 7.72 (s, 1H), 7.49 (d,  $J = 7.1$  Hz, 2H), 7.43 – 7.30 (m, 3H), 7.24 – 7.18 (m, 4H), 7.10 (m, 5H), 7.00 – 6.93 (m, 2H), 6.86 (d,  $J = 8.0$  Hz, 1H);  $^{13}\text{C}$  NMR (75 MHz,  $\text{CDCl}_3$ )  $\delta$  153.6, 148.9, 140.4, 136.2, 135.1, 132.1, 131.7, 131.2, 131.2, 131.0 (q,  $J = 3.1$  Hz), 130.6, 129.4, 128.8, 128.1, 127.9, 127.2, 126.5, 123.9, 123.4, 123.4, 123.3, 123.3, 122.4 (q,  $J = 3.8$  Hz), 121.6, 120.7;  $^{19}\text{F}$  NMR (471 MHz,  $\text{CDCl}_3$ )  $\delta$  -62.9; HRMS (ESI)  $m/z$  441.1569 ( $\text{M}+\text{H}^+$ ), calc. for  $\text{C}_{28}\text{H}_{19}\text{F}_3\text{N}_2$  441.1573.

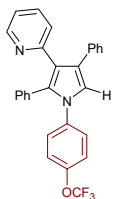

**(4,5-Diphenyl-1-(4-(trifluoromethoxy)phenyl)-1H-pyrrol-3-yl)pyridine (41):** brown solid; Mp: 140.2-141.1 °C; 34.2 mg, 90 % yield;  $^1\text{H}$  NMR (300 MHz, Chloroform-*d*)  $\delta$  8.56 (d,  $J = 4.8$  Hz, 1H), 7.61 (s, 1H), 7.42 – 7.34 (m, 1H), 7.26 – 7.23 (m, 1H), 7.22 (d,  $J = 2.3$  Hz, 2H), 7.20 (d,  $J = 3.1$  Hz, 2H), 7.18 (d,  $J = 2.3$  Hz, 2H), 7.14 (s, 2H), 7.12 (dd,  $J = 4.8, 2.4$  Hz, 3H), 7.03 (td,  $J = 7.5, 4.9, 1.0$  Hz, 1H), 6.98 – 6.93 (m, 2H), 6.85 (d,  $J = 8.0$  Hz, 1H).  $^{13}\text{C}$  NMR (75 MHz,  $\text{CDCl}_3$ )  $\delta$  153.9, 149.3, 147.5 (q,  $J = 1.9$  Hz), 138.4, 135.7, 135.3, 131.9, 131.3, 131.0, 130.9, 128.0, 127.8, 126.9, 126.4, 124.7, 123.5, 123.3, 122.1, 121.2, 120.6;  $^{19}\text{F}$  NMR (471 MHz,  $\text{CDCl}_3$ )  $\delta$  -57.9; HRMS (ESI)  $m/z$  457.1514 ( $\text{M}+\text{H}^+$ ), calc. for  $\text{C}_{28}\text{H}_{19}\text{F}_3\text{N}_2\text{O}$  457.1522.

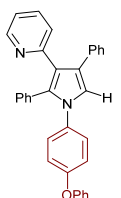

**2-(1-(4-Phenoxyphenyl)-2,4-diphenyl-1H-pyrrol-3-yl)pyridine (42):** brown solid; Mp: 167.3-168.4 °C; 39.0 mg, 84 % yield;  $^1\text{H}$  NMR (300 MHz,  $\text{CDCl}_3$ )  $\delta$  8.54 (d,  $J = 4.6$  Hz, 1H), 7.47 (d,  $J = 5.9$  Hz, 1H), 7.39 – 7.32 (m, 2H), 7.22 (d,  $J = 3.4$  Hz, 4H), 7.11 (d,  $J = 8.0$  Hz, 8H), 7.06 – 6.98 (m, 5H), 6.91 (d,  $J = 8.6$  Hz, 3H);  $^{13}\text{C}$  NMR (75 MHz,  $\text{CDCl}_3$ )  $\delta$  156.7, 156.0, 155.3, 149.0, 135.7, 135.1, 135.0, 132.9, 131.5, 130.9, 129.8, 128.2, 128.1, 127.7, 127.3, 126.8, 126.1, 125.8, 125.2, 123.7, 121.5, 120.9, 119.1, 118.8; HRMS (ESI)  $m/z$  465.1958 ( $\text{M}+\text{H}^+$ ), calc. for  $\text{C}_{33}\text{H}_{24}\text{N}_2\text{O}$  465.1962.

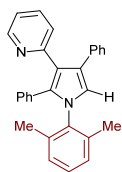

**2-(1-(2,6-Dimethylphenyl)-2,4-diphenyl-1H-pyrrol-3-yl)pyridine (43):** yellow oil; 32.8 mg, 82% yield;  $^1\text{H}$  NMR (300 MHz,  $\text{CDCl}_3$ )  $\delta$  8.53 (d,  $J = 4.1$  Hz, 1H), 7.51 – 7.46 (m, 1H), 7.40 – 7.32 (m, 1H), 7.22 (d,  $J = 4.2$  Hz, 3H), 7.16 (m, 3H), 7.05 (m, 6H), 6.89 (d,  $J = 7.5$  Hz, 2H), 6.85 (s, 1H), 2.08 (s, 6H);  $^{13}\text{C}$  NMR (75 MHz,  $\text{CDCl}_3$ )  $\delta$  156.2, 149.1, 137.7, 136.8, 132.0, 130.3, 129.9, 128.5, 128.1, 126.9, 126.5, 126.0, 123.6, 122.6, 121.1, 21.3; HRMS (ESI)  $m/z$  401.2007 ( $\text{M}+\text{H}^+$ ), calc. for  $\text{C}_{29}\text{H}_{24}\text{N}_2$  401.2012.

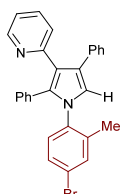

**2-(1-(4-Bromo-2-methylphenyl)-4,5-diphenyl-1H-pyrrol-3-yl)pyridine (44):** white solid; Mp: 174.2-175.3 °C; 36.3 mg, 78 % yield;  $^1\text{H}$  NMR (300 MHz,  $\text{CDCl}_3$ )  $\delta$  8.55 (d,  $J = 4.7$  Hz, 1H), 7.40 (d,  $J = 6.5$  Hz, 2H), 7.31 (d,  $J = 5.8$  Hz, 2H), 7.22 (d,  $J = 5.2$  Hz, 3H), 7.20 – 7.12 (m, 3H), 7.09 – 6.99 (m, 4H), 6.85 (t,  $J = 7.5$  Hz, 3H), 1.98 (s, 3H);  $^{13}\text{C}$  NMR (75 MHz,  $\text{CDCl}_3$ )  $\delta$  154.1, 149.1, 138.3, 137.7, 135.9, 135.5, 133.5, 133.0, 131.5, 131.0, 130.4, 129.9, 129.4, 128.1, 127.7, 126.7, 126.3, 123.7, 122.3, 122.2, 121.7, 120.5, 17.7; HRMS (ESI)  $m/z$  465.0956 ( $\text{M}+\text{H}^+$ ), calc. for  $\text{C}_{28}\text{H}_{21}\text{BrN}_2$  465.0961.

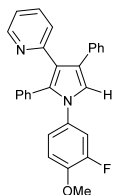

**2-(1-(3-Fluoro-4-methoxyphenyl)-2,4-diphenyl-1H-pyrrol-3-yl)pyridine (45):** yellow oil; 33.6 mg, 80 % yield;  $^1\text{H}$  NMR (300 MHz,  $\text{CDCl}_3$ )  $\delta$  8.55 (d,  $J = 4.7$  Hz, 1H), 7.61 (s, 1H), 7.40 (t,  $J = 7.7$  Hz, 1H), 7.25 – 7.14 (m, 5H), 7.14 – 7.07 (m, 3H), 7.04 (dd,  $J = 7.3, 5.2$  Hz, 1H), 6.95 (t,  $J = 5.9$  Hz, 3H), 6.91 – 6.80 (m, 3H), 3.87 (s, 3H);  $^{13}\text{C}$  NMR (75 MHz,  $\text{CDCl}_3$ )  $\delta$  153.9, 151.6 (d,  $J = 247.7$  Hz), 148.8, 146.6, 146.5, 136.1, 135.4, 133.00 (d,  $J = 8.6$  Hz), 132.2, 131.4, 131.0 (d,  $J = 8.3$  Hz), 128.0, 127.8, 126.9, 126.3, 123.7, 123.6, 123.1, 122.3, 121.7 (d,  $J = 3.6$  Hz), 120.5, 114.3 (d,  $J = 20.7$  Hz), 121.6 (d,  $J = 3.6$  Hz), 56.3;  $^{19}\text{F}$  NMR (471 MHz,  $\text{CDCl}_3$ )  $\delta$  -133.1; HRMS (ESI)  $m/z$  421.1706 ( $\text{M}+\text{H}^+$ ), calc. for  $\text{C}_{28}\text{H}_{21}\text{FN}_2\text{O}$  421.1711.

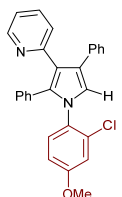

**2-(1-(2-Chloro-4-methoxyphenyl)-2,4-diphenyl-1H-pyrrol-3-yl)pyridine (46):** gray solid; Mp: 178.5-179.6 °C; 38.4 mg, 88% yield;  $^1\text{H}$  NMR (300 MHz,  $\text{CDCl}_3$ )  $\delta$  8.59 – 8.45 (m, 1H), 7.44 (t,  $J = 7.5$  Hz, 1H), 7.30 – 7.13 (m, 6H), 7.12 – 6.98 (m, 8H), 6.95 (s, 1H), 6.70 (d,  $J = 8.8$  Hz, 1H), 3.79 (s, 3H);  $^{13}\text{C}$  NMR (75 MHz,  $\text{CDCl}_3$ )  $\delta$  159.4, 155.5, 149.1, 135.5, 135.2, 134.0, 132.9, 131.6, 130.7, 130.6, 130.5, 128.3, 128.0, 127.6, 126.7, 126.0, 125.7, 125.0, 122.2, 122.0, 120.8, 115.0, 113.0, 55.7; HRMS (ESI)  $m/z$  437.1411 ( $\text{M}+\text{H}^+$ ), calc. for  $\text{C}_{28}\text{H}_{21}\text{ClN}_2\text{O}$  437.1415.

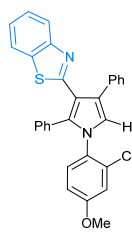

**2-(1-(2-Chloro-4-methoxyphenyl)-2,4-diphenyl-1H-pyrrol-3-yl)benzo[d]thiazole (47):** brown solid; Mp: 196.2-197.3 °C; 43.4 mg, 88 % yield; <sup>1</sup>H NMR (300 MHz, CDCl<sub>3</sub>) δ 7.83 (d, *J* = 7.4 Hz, 1H), 7.70 (d, *J* = 9.0 Hz, 1H), 7.39 – 7.32 (m, 1H), 7.26 (s, 2H), 7.14 (t, *J* = 10.0 Hz, 11H), 6.74 (s, 1H), 6.63 (d, *J* = 6.9 Hz, 1H), 3.71 (s, 3H); <sup>13</sup>C NMR (75 MHz, CDCl<sub>3</sub>) δ 159.6, 153.3, 136.1, 135.5, 134.3, 134.2, 133.2, 132.1, 131.5, 131.1, 131.0, 130.9, 128.9, 127.7, 127.6, 127.6, 127.0, 126.0, 125.3, 124.2, 123.4, 122.9, 121.1, 116.2, 114.5, 112.8, 55.5; HRMS (ESI) *m/z* 493.1132 (M+H<sup>+</sup>), calc. for C<sub>30</sub>H<sub>21</sub>ClN<sub>2</sub>OS 493.1136.

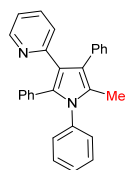

**2-(5-Methyl-1,2,4-triphenyl-1H-pyrrol-3-yl)pyridine (48):** yellow oil; 35.2 mg, 91 % yield; <sup>1</sup>H NMR (300 MHz, CDCl<sub>3</sub>) δ 8.54 (d, *J* = 3.7 Hz, 1H), 7.47 (m, 1H), 7.43 – 7.30 (m, 1H), 7.22 (m, 5H), 7.18 – 7.15 (m, 1H), 7.14 – 7.07 (m, 6H), 7.04 (d, *J* = 7.2 Hz, 4H), 2.34 (s, 3H); <sup>13</sup>C NMR (75 MHz, CDCl<sub>3</sub>) δ 156.1, 149.1, 136.9, 131.1, 127.5, 127.3, 125.8, 124.9, 124.6, 123.7, 121.1, 116.2, 108.4, 105.8, 12.8; HRMS (ESI) *m/z* 387.1851 (M+H<sup>+</sup>), calc. for C<sub>28</sub>H<sub>22</sub>N<sub>2</sub> 387.1856.

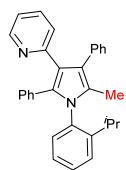

**2-(1-(2-Isopropylphenyl)-5-methyl-2,4-diphenyl-1H-pyrrol-3-yl)pyridine (49):** yellow oil; 32.1 mg, 75 % yield; <sup>1</sup>H NMR (300 MHz, CDCl<sub>3</sub>) δ 8.54 – 8.36 (m, 1H), 7.48 (d, *J* = 6.4 Hz, 2H), 7.40 – 7.28 (m, 3H), 7.26 (s, 2H), 7.22 (d, *J* = 8.3 Hz, 4H), 7.00 (s, 6H), 2.61 – 2.34 (m, 1H), 2.07 (s, 3H), 1.03 (d, *J* = 5.6 Hz, 3H), 0.54 (d, *J* = 5.9 Hz, 3H); <sup>13</sup>C NMR (75 MHz, CDCl<sub>3</sub>) δ 156.1, 149.1, 136.9, 132.0, 130.3, 128.5, 128.3, 126.9, 126.5, 126.4, 125.7, 123.7, 122.6, 121.1, 116.2, 108.4, 105.8, 34.1, 23.9, 12.8; HRMS (ESI) *m/z* 429.2320 (M+H<sup>+</sup>), calc. for C<sub>31</sub>H<sub>28</sub>N<sub>2</sub> 429.2325.

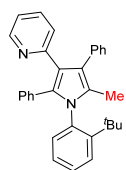

**2-(1-(2-(Tert-butyl)phenyl)-5-methyl-2,4-diphenyl-1H-pyrrol-3-yl)pyridine (50):** yellow oil; 34.5 mg, 78 % yield; 20% ee; <sup>1</sup>H NMR (300 MHz, CDCl<sub>3</sub>) δ 8.40 (d, *J* = 4.1 Hz, 1H), 7.47 – 7.42 (m, 1H), 7.35 (dt, *J* = 7.4, 2.3 Hz, 3H), 7.29 (s, 1H), 7.23 (d, *J* = 6.1 Hz, 2H), 7.19 – 7.14 (m, 3H), 7.02 – 6.86 (m, 7H), 0.98 (s, 9H); <sup>13</sup>C NMR (75 MHz, CDCl<sub>3</sub>) δ 148.9, 147.5, 136.0, 135.3, 135.2, 133.0, 132.5, 131.0, 130.4, 130.1, 128.7, 128.6, 127.7, 127.3, 126.1, 126.0, 125.9, 125.3, 121.9, 120.2, 36.0, 31.4, 12.1; HRMS (ESI) *m/z* 443.2478 (M+H<sup>+</sup>), calc. for C<sub>32</sub>H<sub>30</sub>N<sub>2</sub> 443.2482.

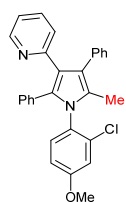

**2-(1-(2-Chloro-4-methoxyphenyl)-5-methyl-2,4-diphenyl-1H-pyrrol-3-yl)pyridine (51):** yellow solid; Mp: 191.2-192.3 °C; 40.1 mg, 89 % yield; <sup>1</sup>H NMR (300 MHz, CDCl<sub>3</sub>) δ 8.41 (s, 1H), 7.39 – 7.32 (m, 1H), 7.26 – 7.11 (m, 6H), 7.06 (s, 5H), 6.95 (m, 3H), 6.75 (d, *J* = 8.6 Hz, 1H), 3.79 (s, 3H), 2.10 (s, 3H); <sup>13</sup>C NMR (75 MHz, CDCl<sub>3</sub>) δ 159.6, 155.6, 148.9, 136.0, 135.1, 134.5, 132.5, 132.2, 131.7, 130.6,

130.4, 129.6, 128.3, 127.7, 127.5, 126.4, 125.7, 125.4, 122.4, 121.7, 120.2, 114.9, 113.1, 55.6, 11.1; HRMS (ESI)  $m/z$  451.1568 ( $M+H^+$ ), calc. for  $C_{29}H_{23}ClN_2O$  451.1572.

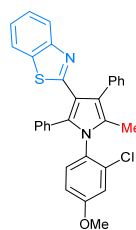

**2-(1-(2-Chloro-4-methoxyphenyl)-5-methyl-2,4-diphenyl-1H-pyrrol-3-yl)benzo[d]thiazole (52):** brown solid; Mp: 124.4-125.3 °C; 41.1 mg, 81 % yield;  $^1H$  NMR (300 MHz,  $CDCl_3$ )  $\delta$  7.80 (d,  $J = 8.0$  Hz, 1H), 7.65 (d,  $J = 7.8$  Hz, 1H), 7.39 – 7.35 (m, 2H), 7.31 (d,  $J = 7.7$  Hz, 2H), 7.28 – 7.20 (m, 5H), 7.18 – 7.12 (m, 4H), 6.96 (d,  $J = 2.7$  Hz, 1H), 6.75 (dd,  $J = 8.7, 2.8$  Hz, 1H), 3.79 (s, 3H), 2.06 (s, 3H);  $^{13}C$  NMR (75 MHz,  $CDCl_3$ )  $\delta$  163.4, 159.8, 153.3, 136.0, 135.0, 134.6, 134.4, 131.5, 131.2, 131.1, 130.8, 128.9, 128.8, 127.8, 127.7, 127.5, 126.1, 125.2, 124.0, 122.8, 122.1, 121.0, 115.7, 115.0, 113.2, 55.6, 11.0; HRMS (ESI)  $m/z$  507.1288 ( $M+H^+$ ), calc. for  $C_{31}H_{23}ClN_2OS$  507.1293.

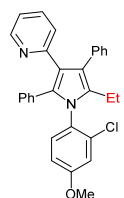

**2-(1-(2-Chloro-4-methoxyphenyl)-5-ethyl-2,4-diphenyl-1H-pyrrol-3-yl)pyridine (53):** brown solid; Mp: 116.8-117.4 °C; 39.5 mg, 85 % yield;  $^1H$  NMR (300 MHz,  $CDCl_3$ )  $\delta$  8.43 – 8.29 (m, 1H), 7.33 (d,  $J = 6.9$  Hz, 1H), 7.24 (m, 6H), 7.04 (s, 5H), 6.93 (s, 3H), 6.78 (d,  $J = 8.0$  Hz, 1H), 3.80 (s, 3H), 2.69 – 2.51 (m, 1H), 2.50 – 2.36 (m, 1H), 0.97 – 0.84 (m, 3H);  $^{13}C$  NMR (75 MHz,  $CDCl_3$ )  $\delta$  159.6, 155.6, 148.9, 136.1, 135.1, 134.7, 133.8, 132.5, 132.2, 132.0, 130.8, 130.3, 129.4, 127.7, 127.4, 126.4, 125.6, 125.5, 121.7, 120.1, 114.8, 112.9, 55.6, 18.4, 14.9; HRMS (ESI)  $m/z$  465.1724 ( $M+H^+$ ), calc. for  $C_{30}H_{25}ClN_2O$  465.1728.

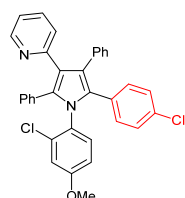

**2-(1-(2-Chloro-4-methoxyphenyl)-5-(4-chlorophenyl)-2,4-diphenyl-1H-pyrrol-3-yl)pyridine (54):** yellow oil; 44.9 mg, 82 % yield;  $^1H$  NMR (300 MHz,  $CDCl_3$ )  $\delta$  8.47 – 8.33 (m, 1H), 7.38 (d,  $J = 7.5$  Hz, 1H), 7.05 (m, 10H), 6.98 (s, 5H), 6.90 (d,  $J = 7.7$  Hz, 2H), 6.76 (s, 1H), 6.63 (d,  $J = 8.8$  Hz, 1H), 3.74 (s, 3H);  $^{13}C$  NMR (75 MHz,  $CDCl_3$ )  $\delta$  159.5, 155.1, 149.1, 135.2, 134.8, 134.4, 133.9, 132.7, 132.3, 132.1, 131.7, 131.1, 130.8, 130.7, 129.1, 127.9, 127.6, 127.5, 126.8, 125.8, 125.5, 123.3, 123.0, 120.5, 114.6, 112.9, 55.5; HRMS (ESI)  $m/z$  547.1334 ( $M+H^+$ ), calc. for  $C_{34}H_{24}Cl_2N_2O$  547.1339.

### 13. Copies of NMR spectra

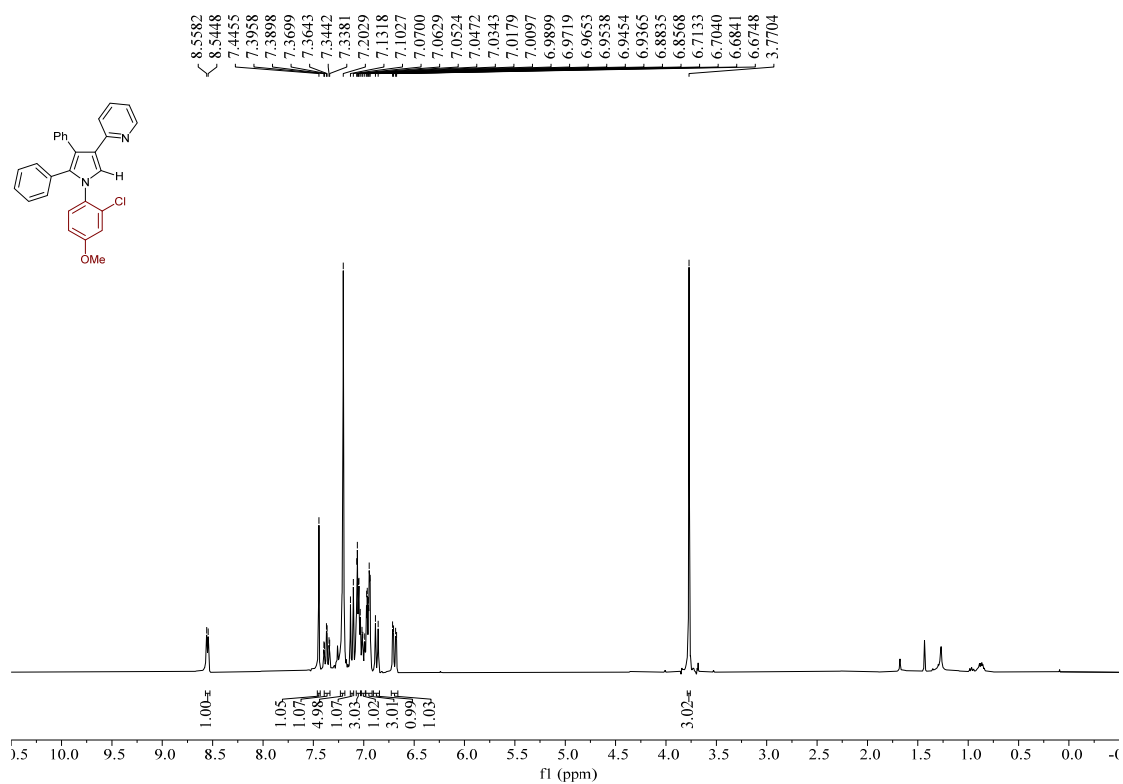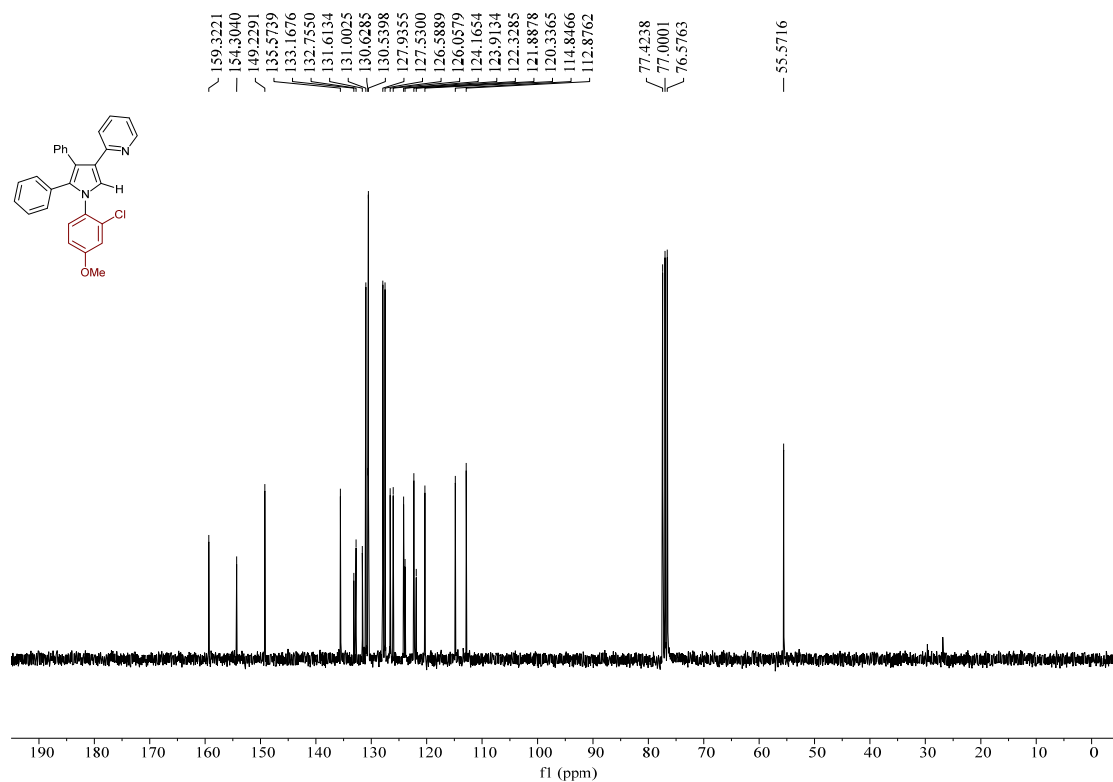

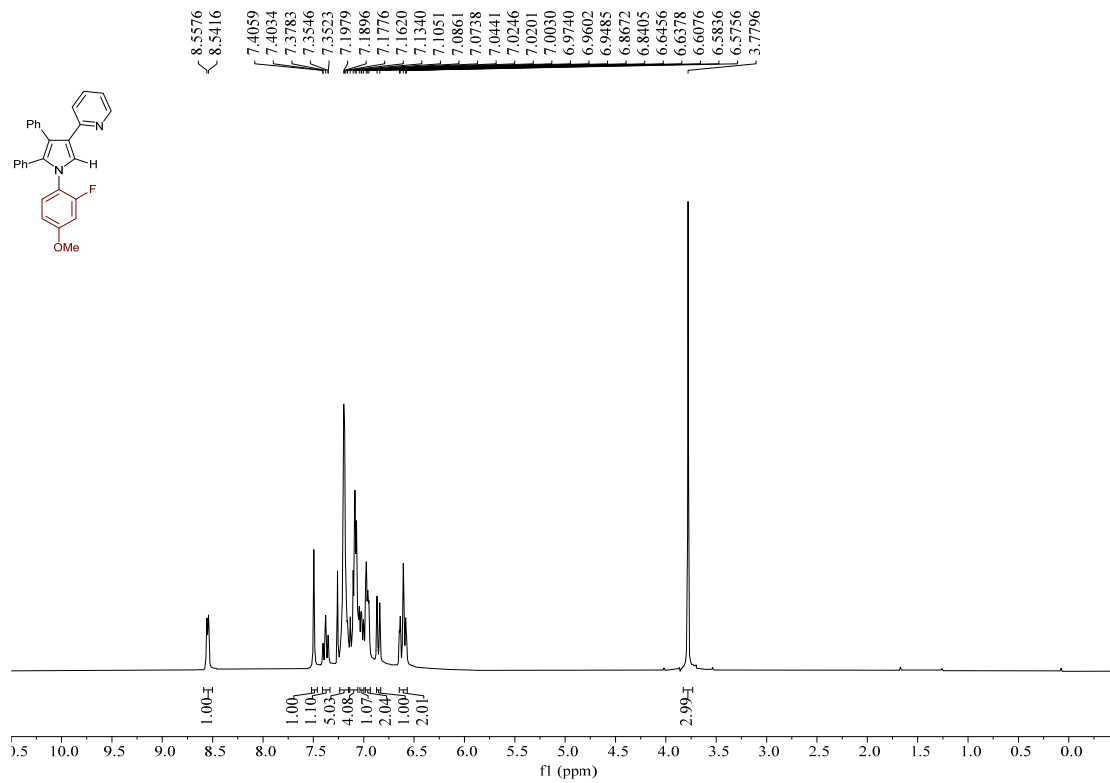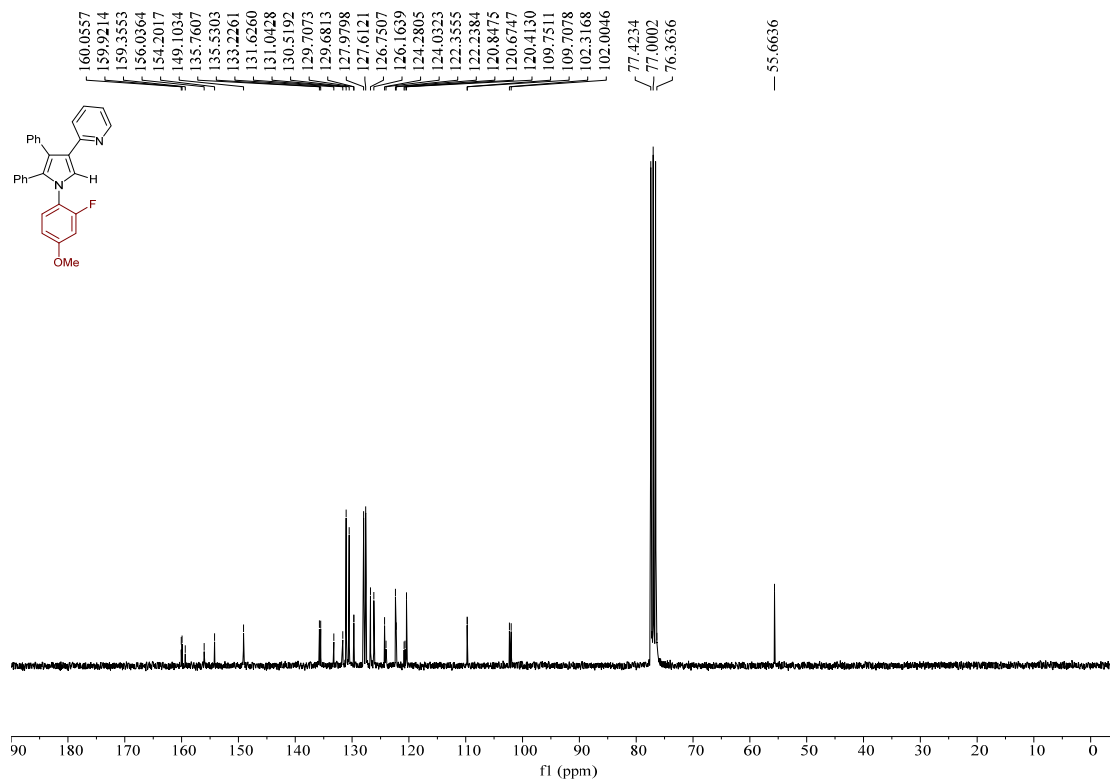

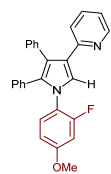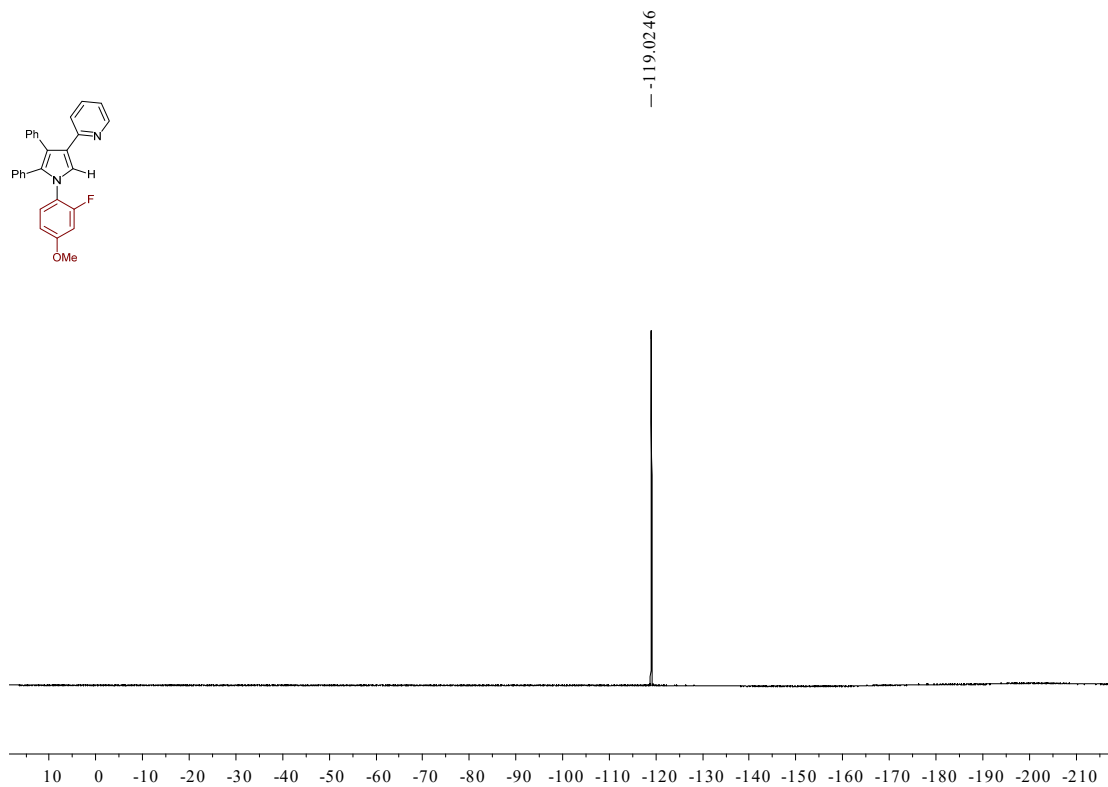

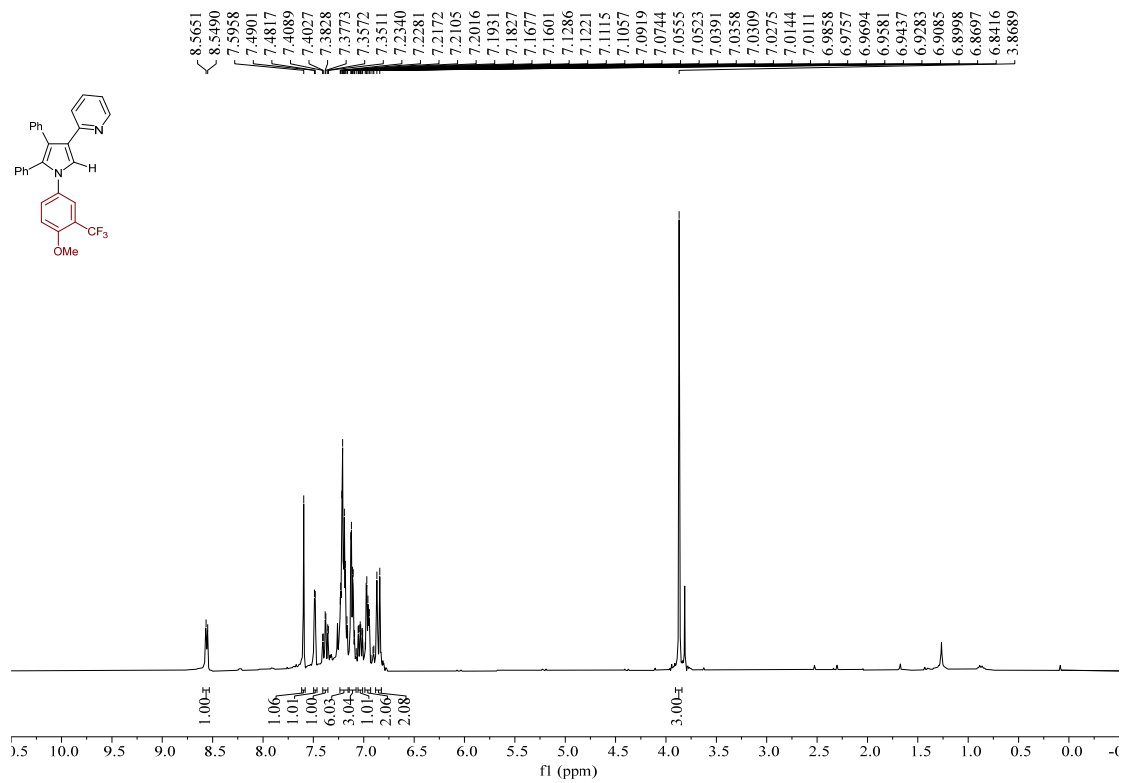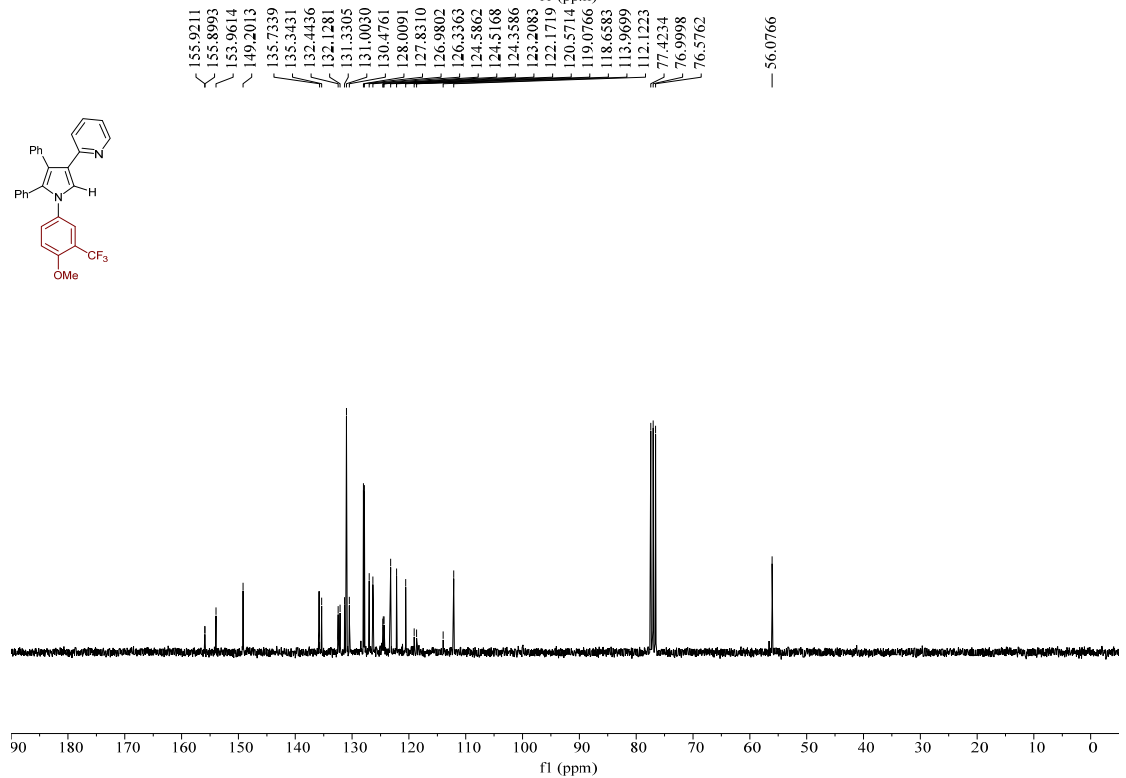



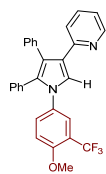

-62.7870

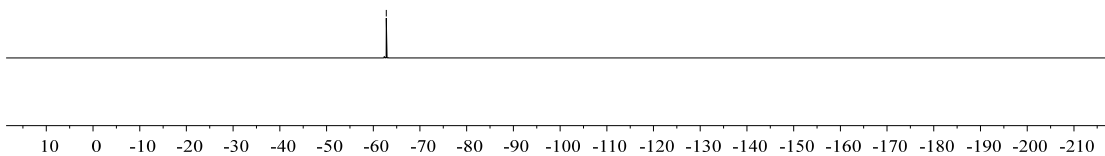

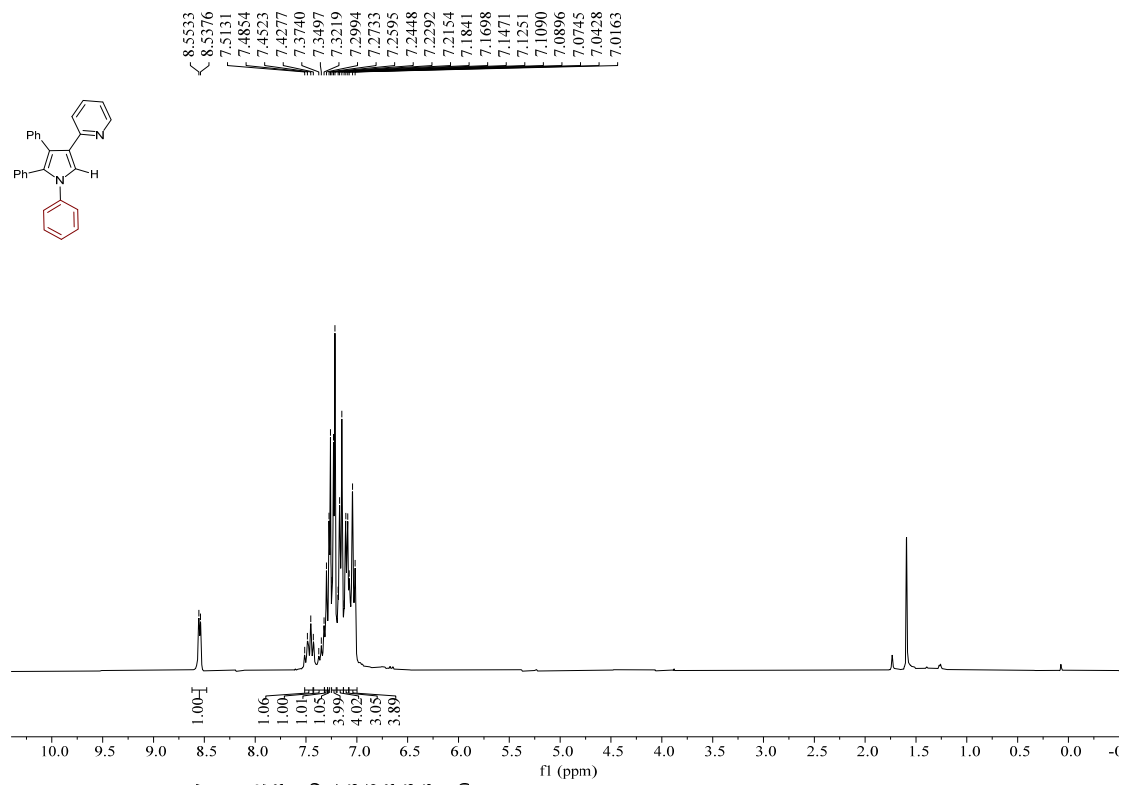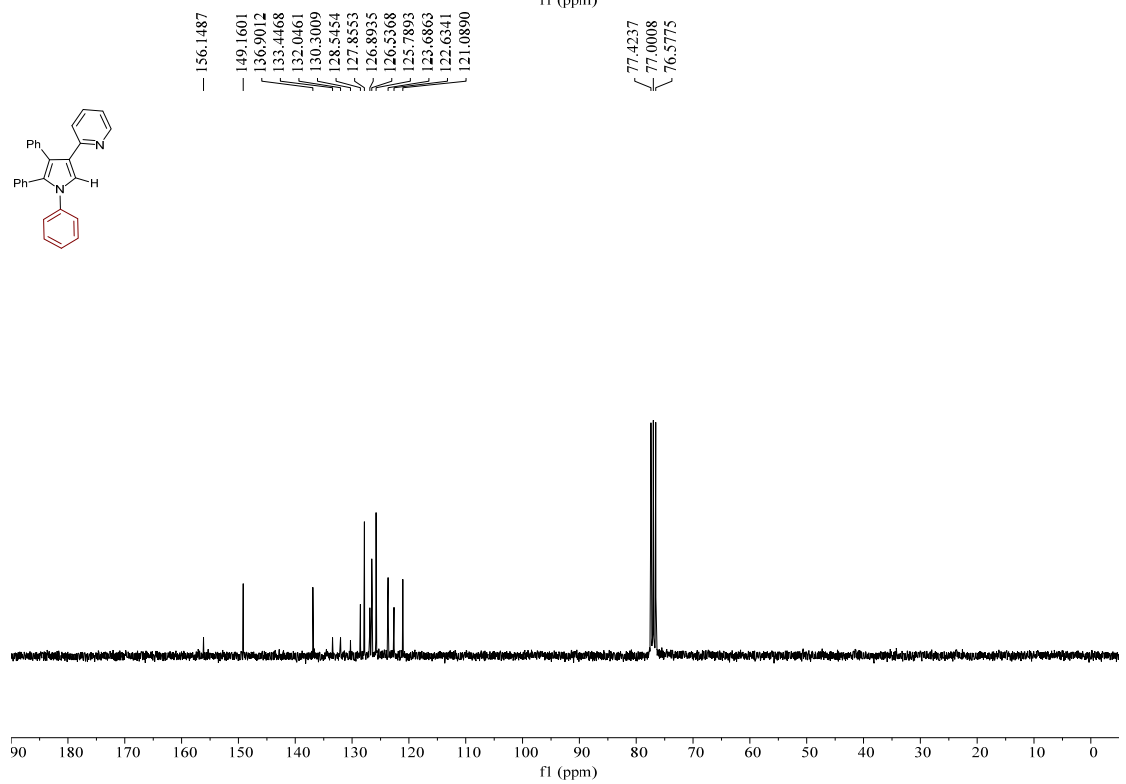

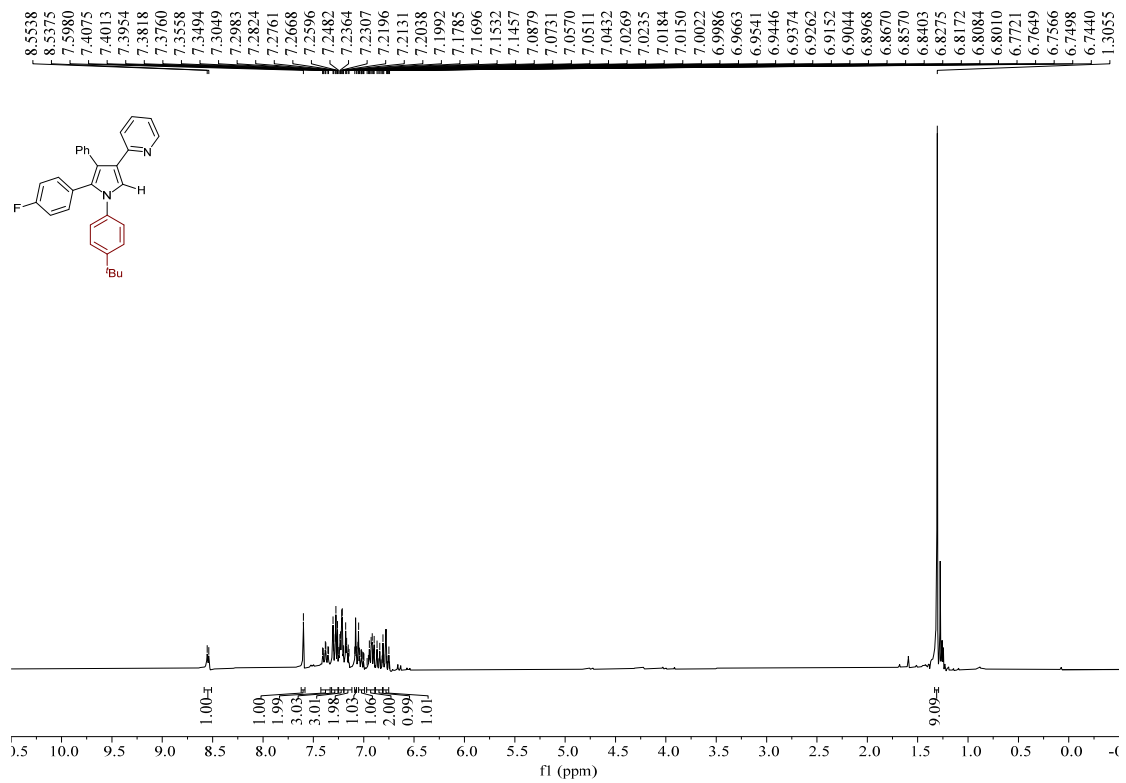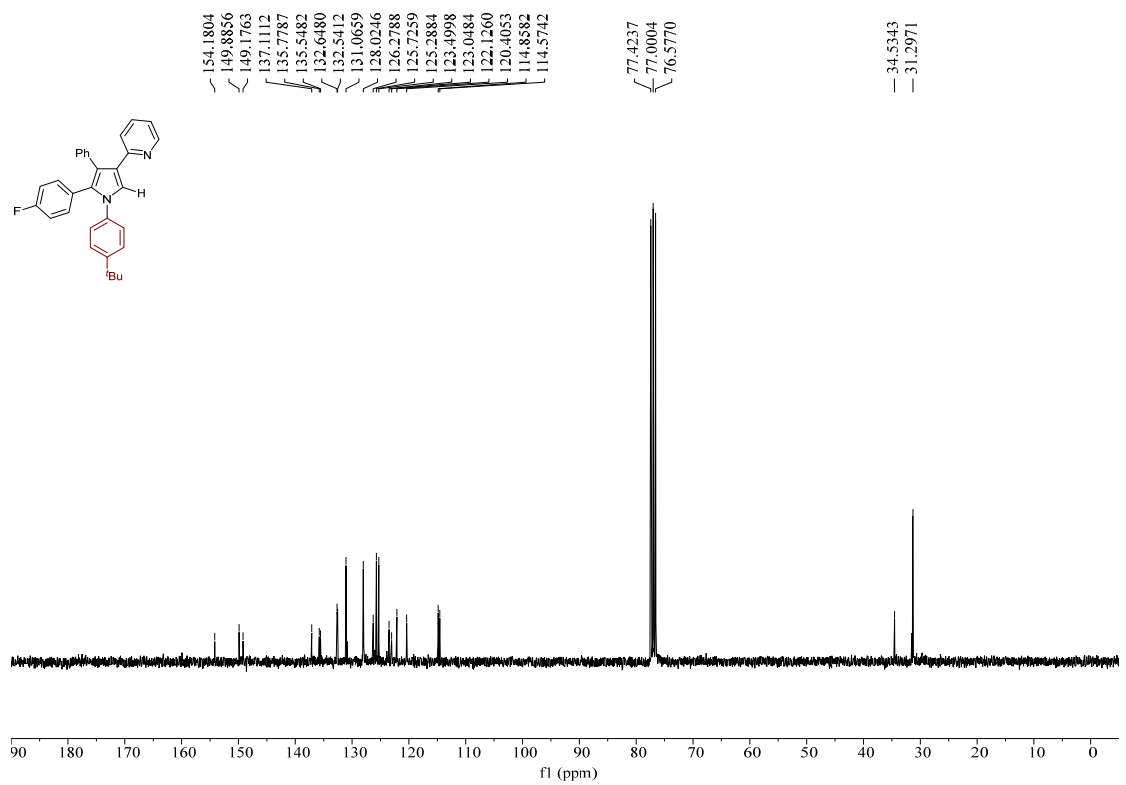

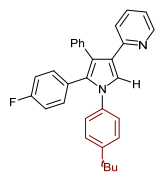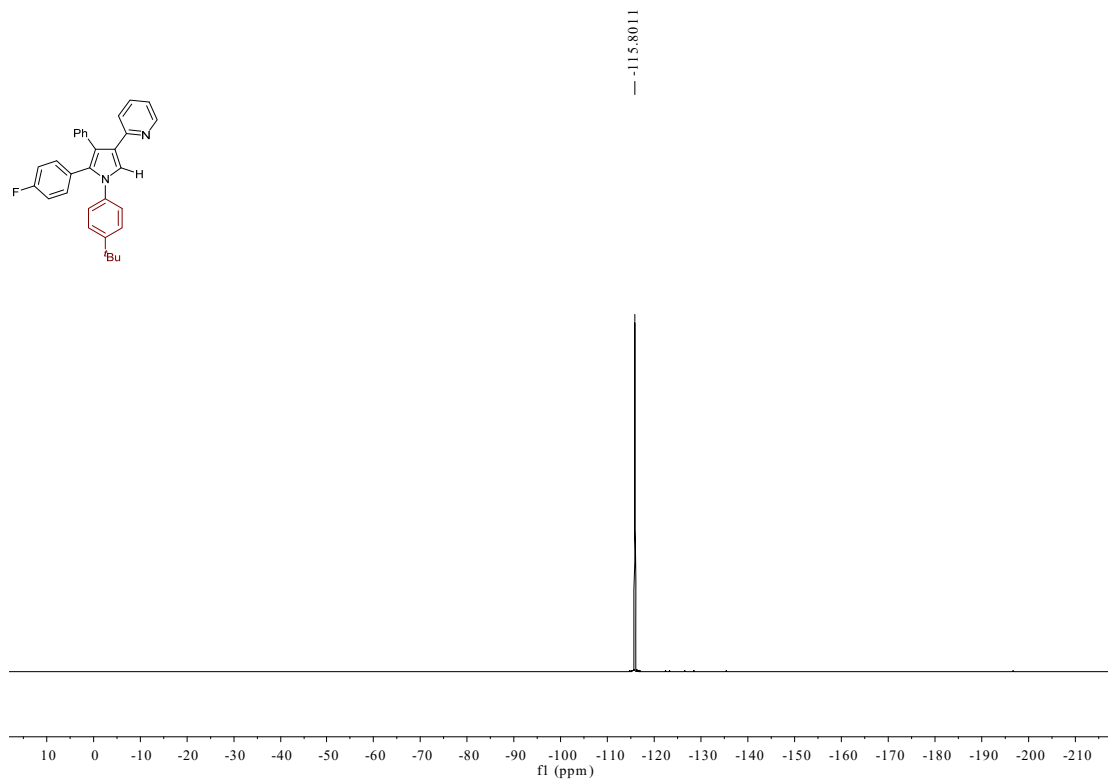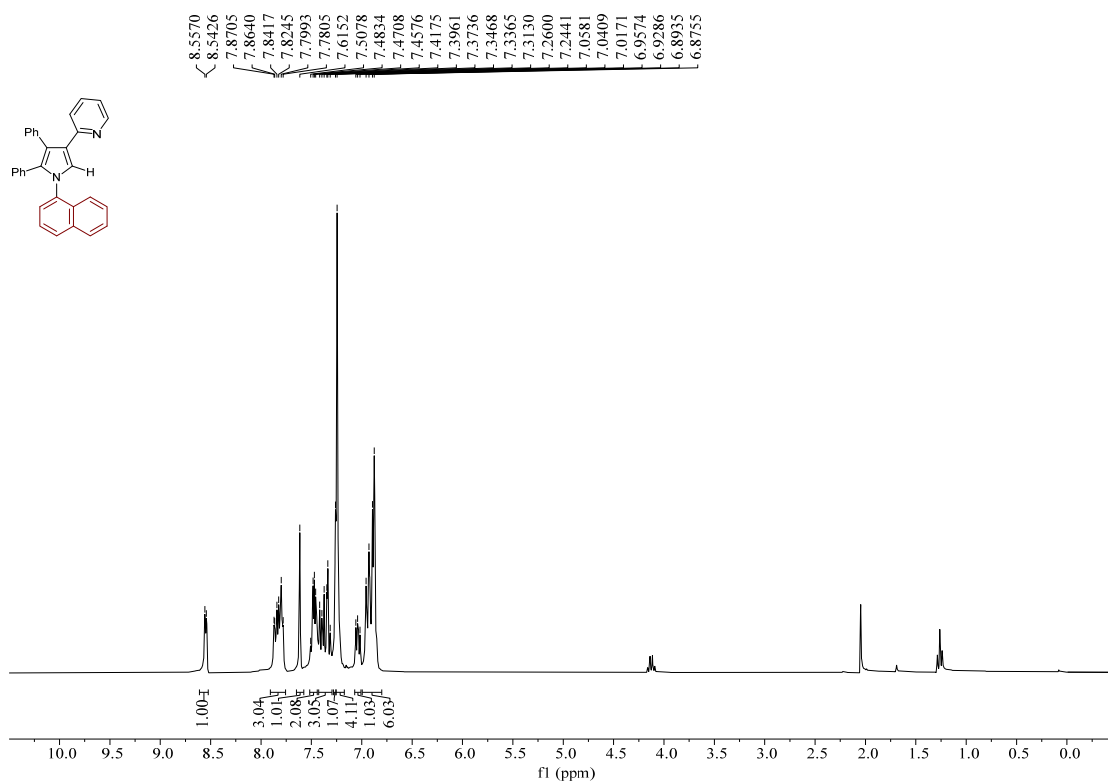

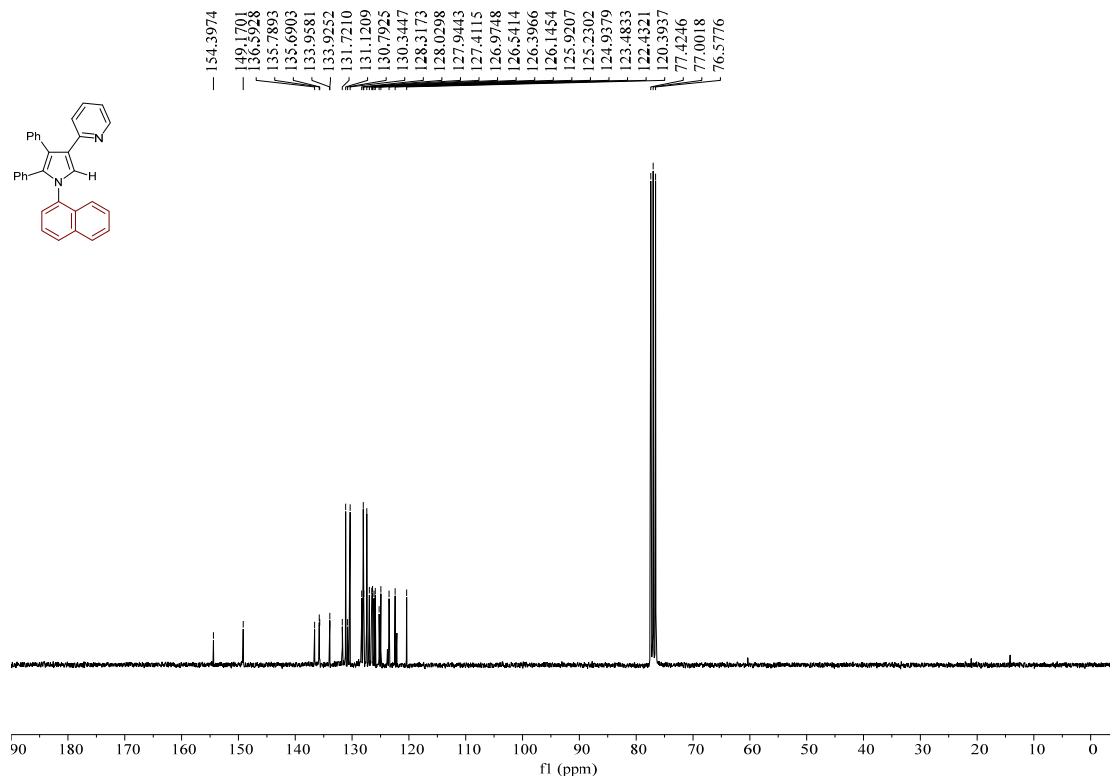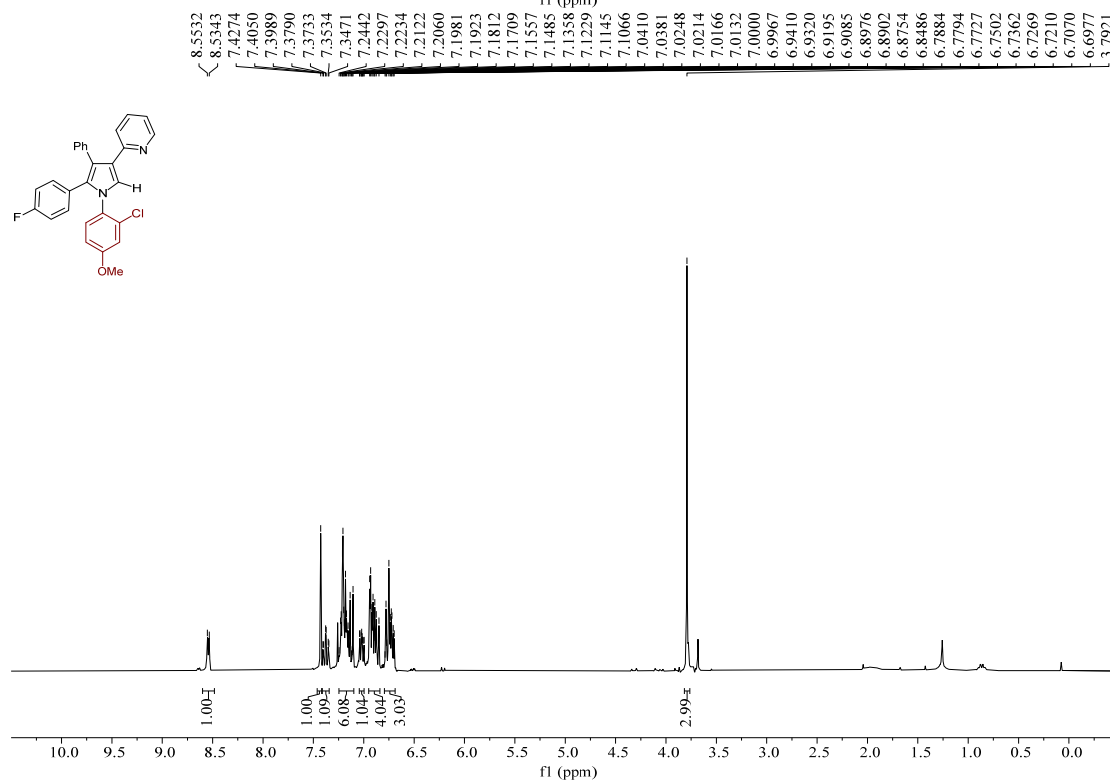

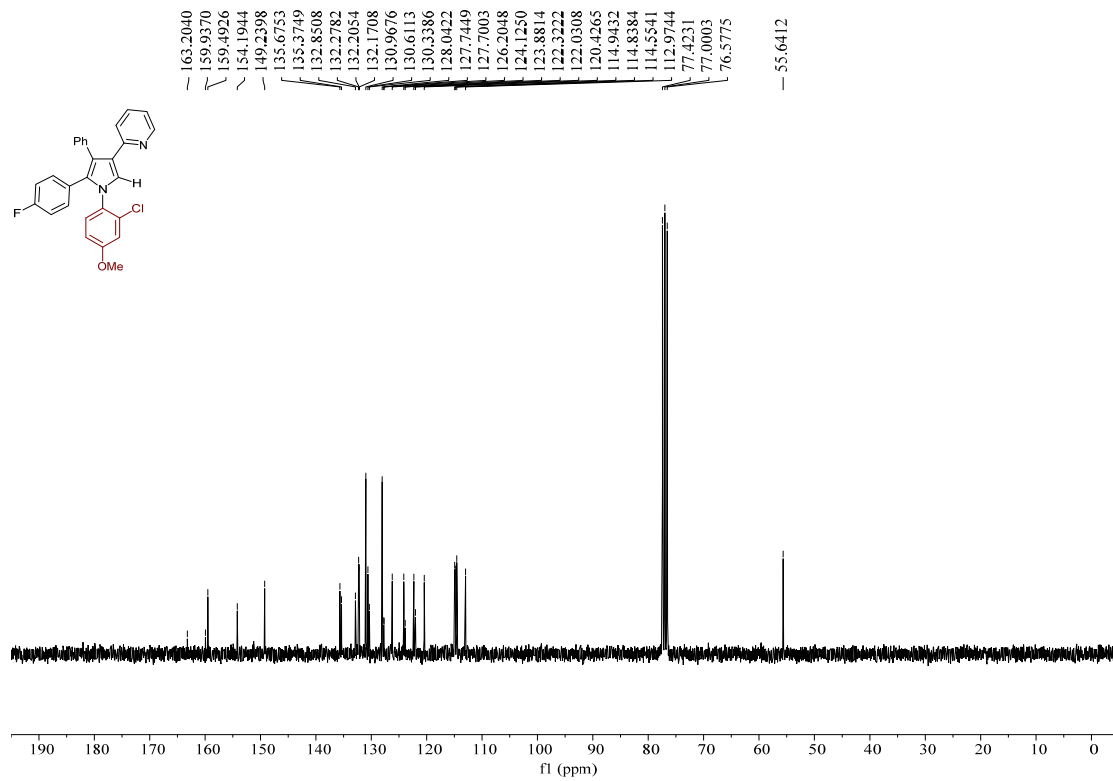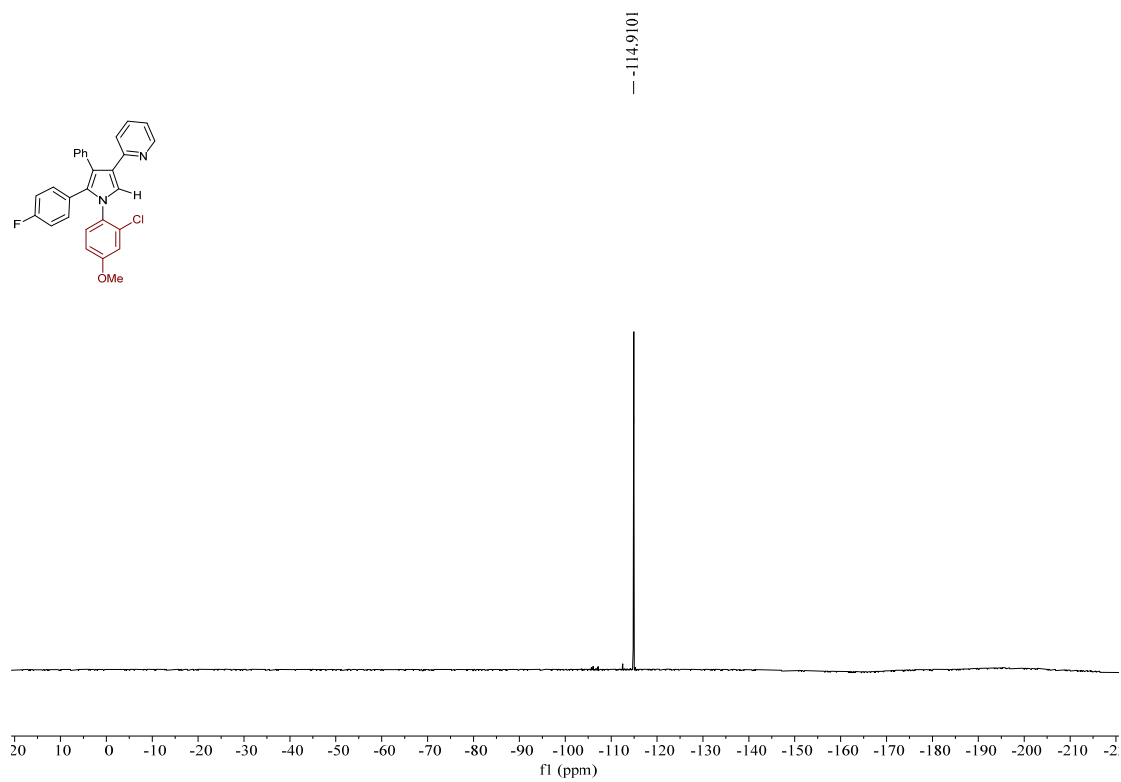

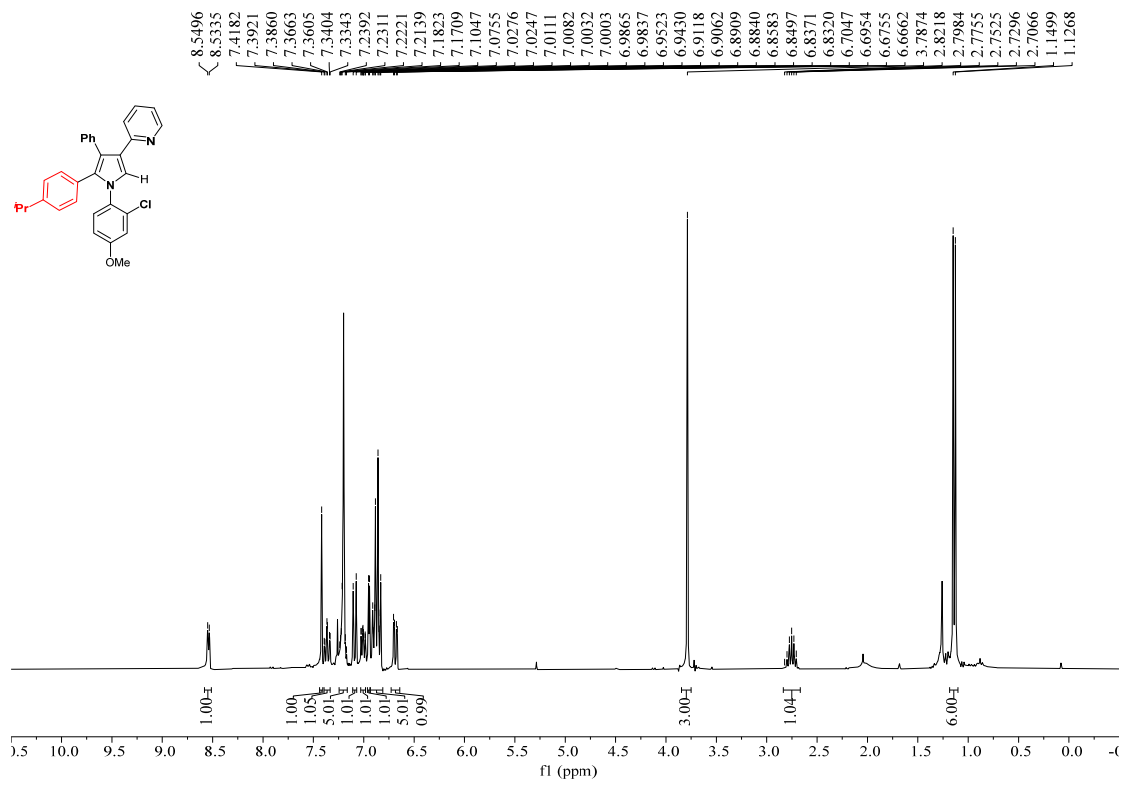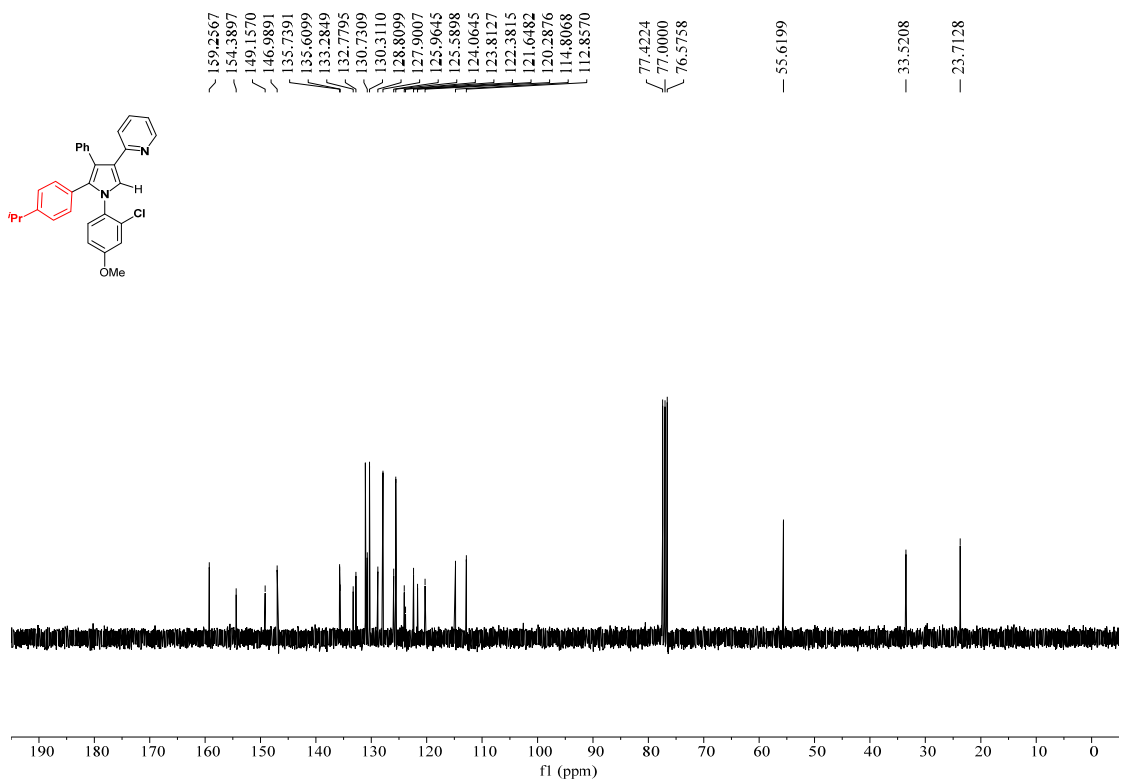

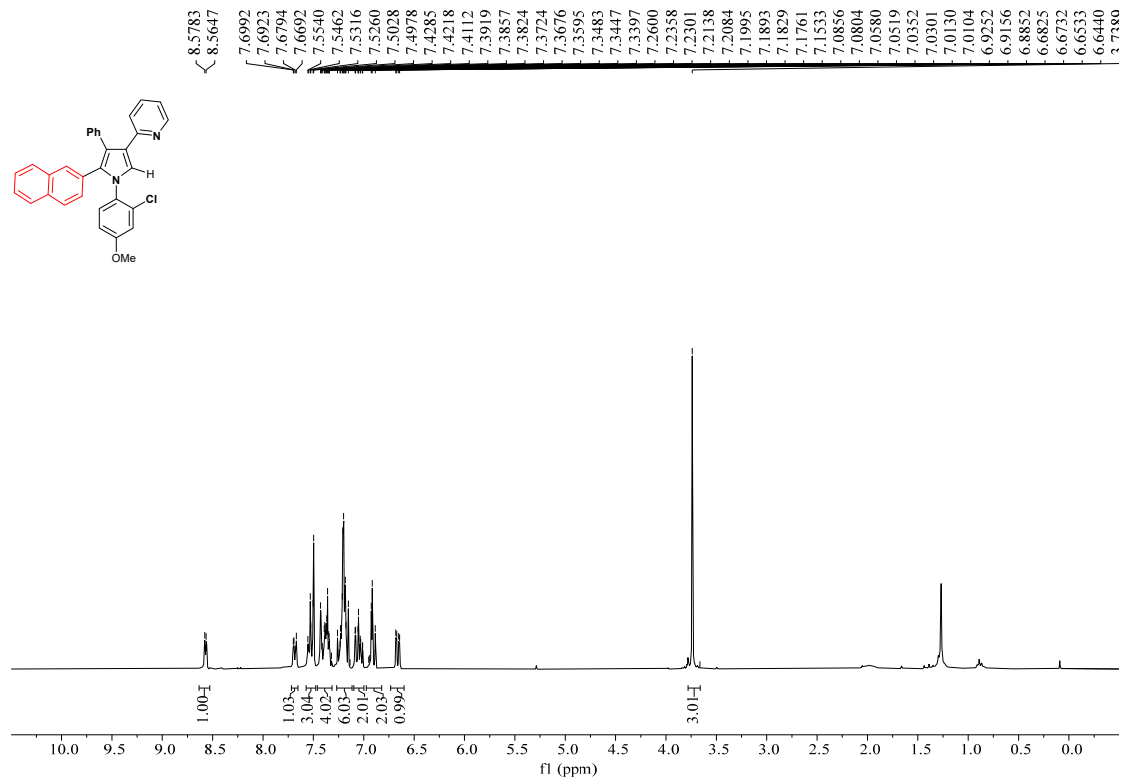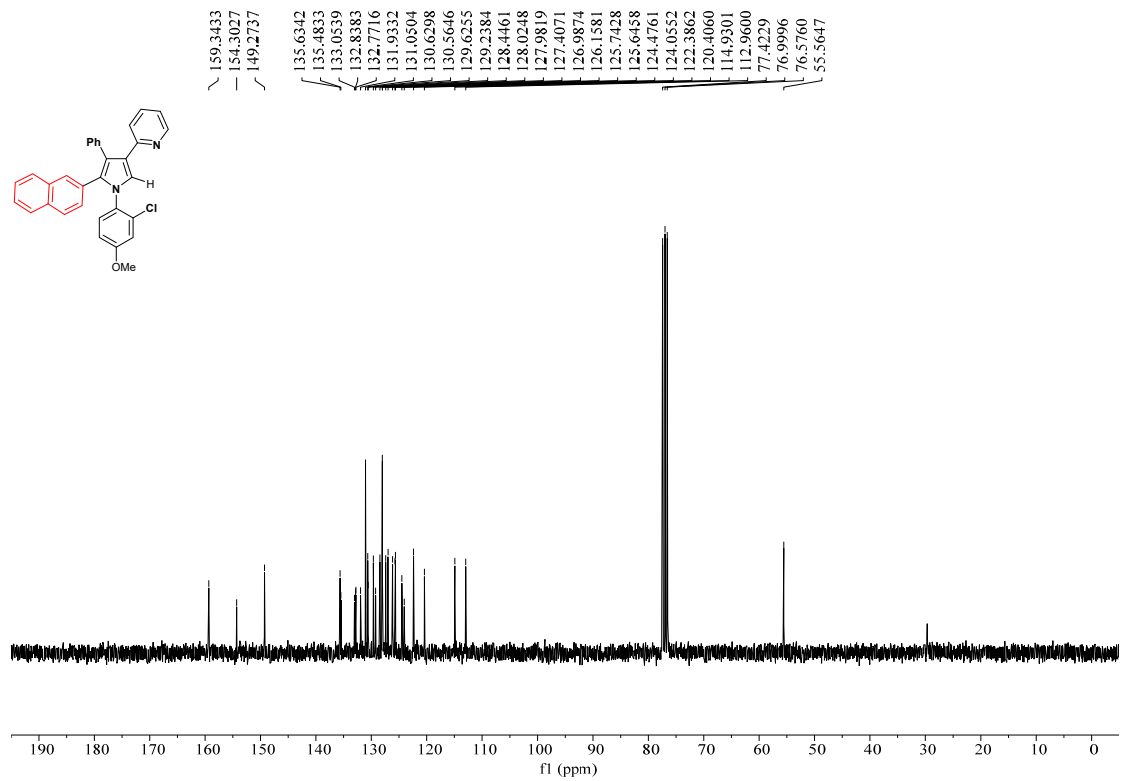



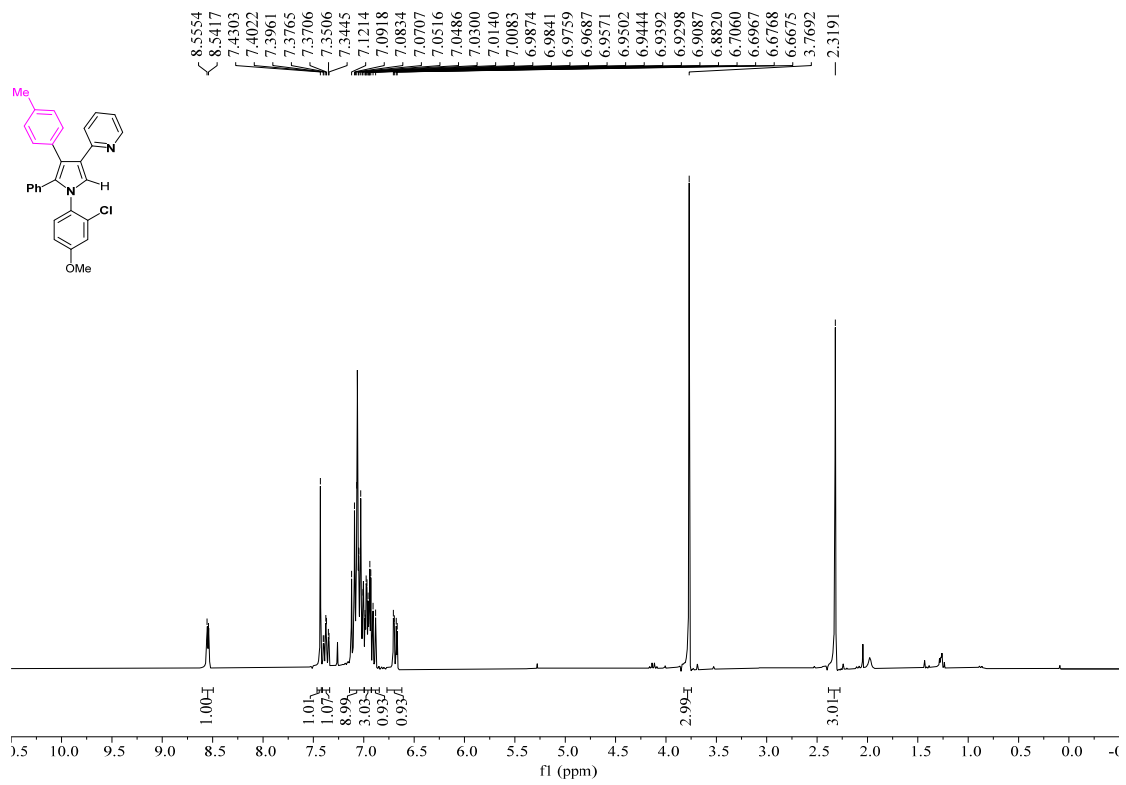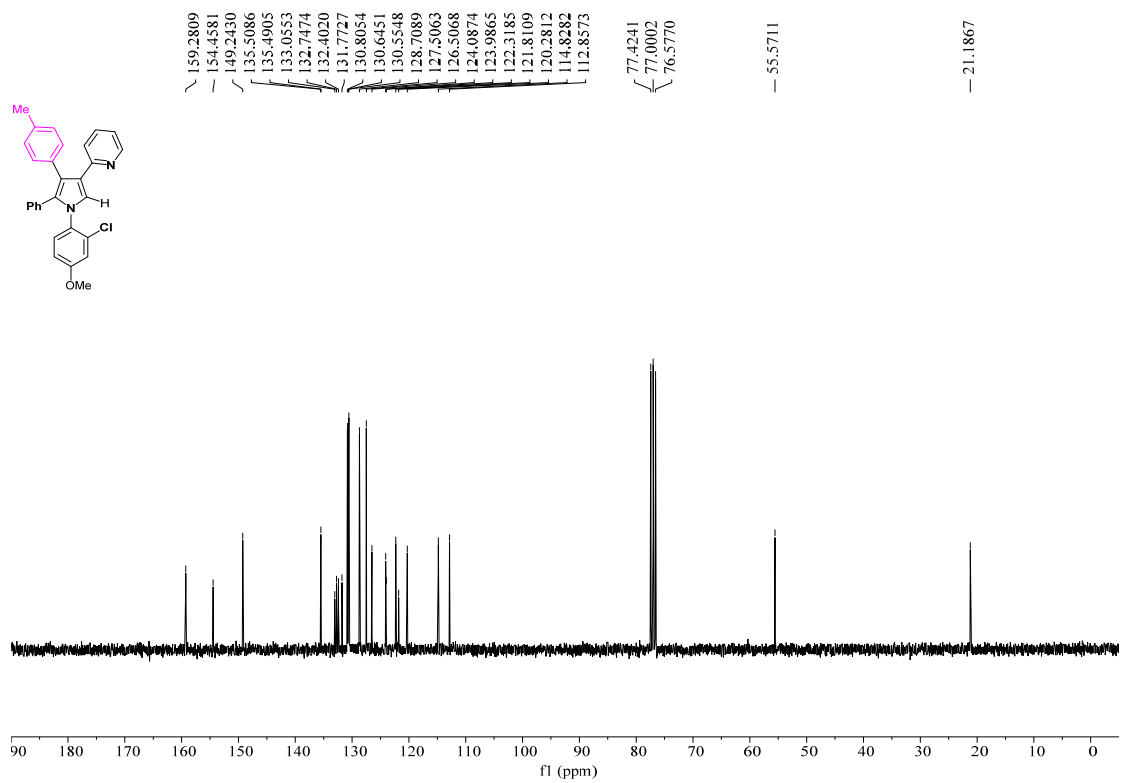

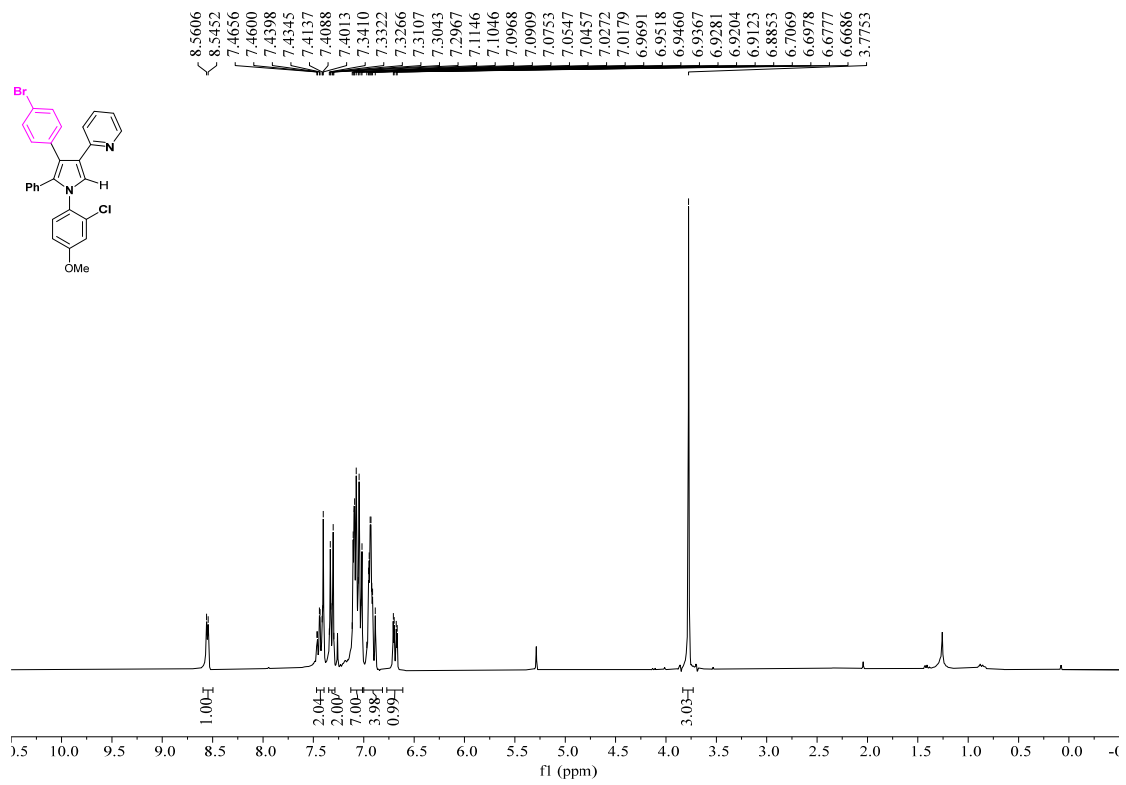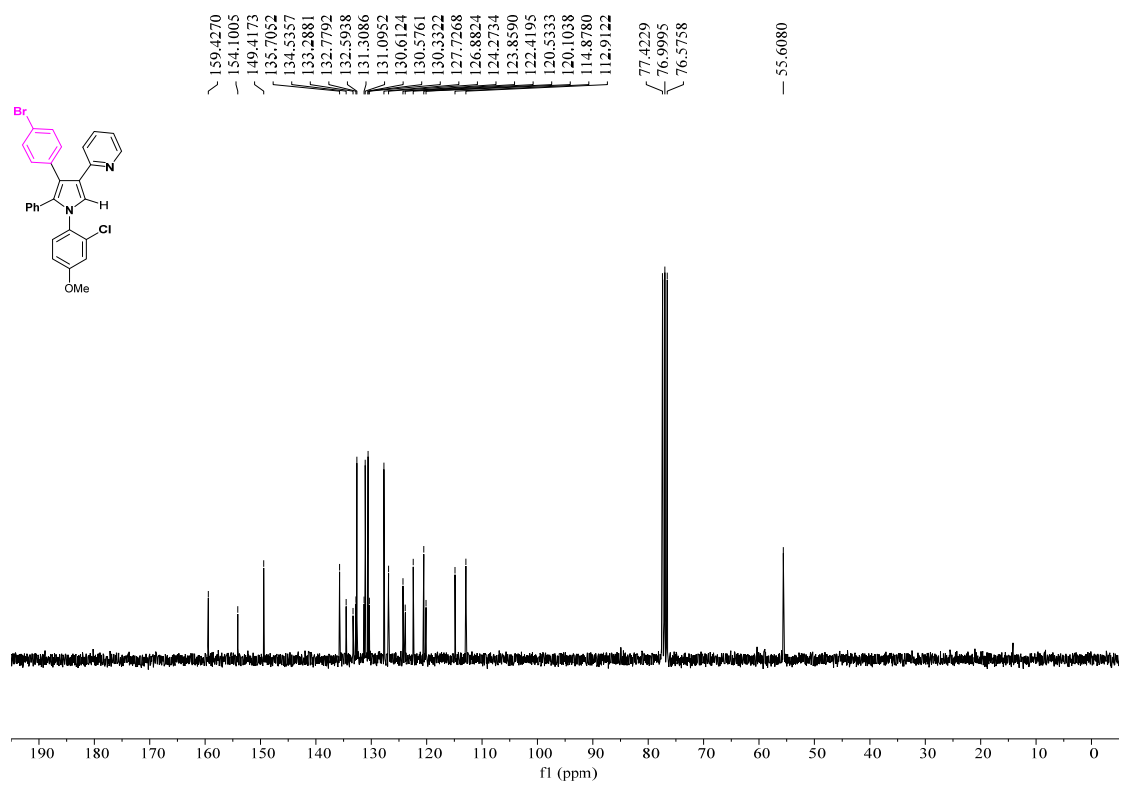

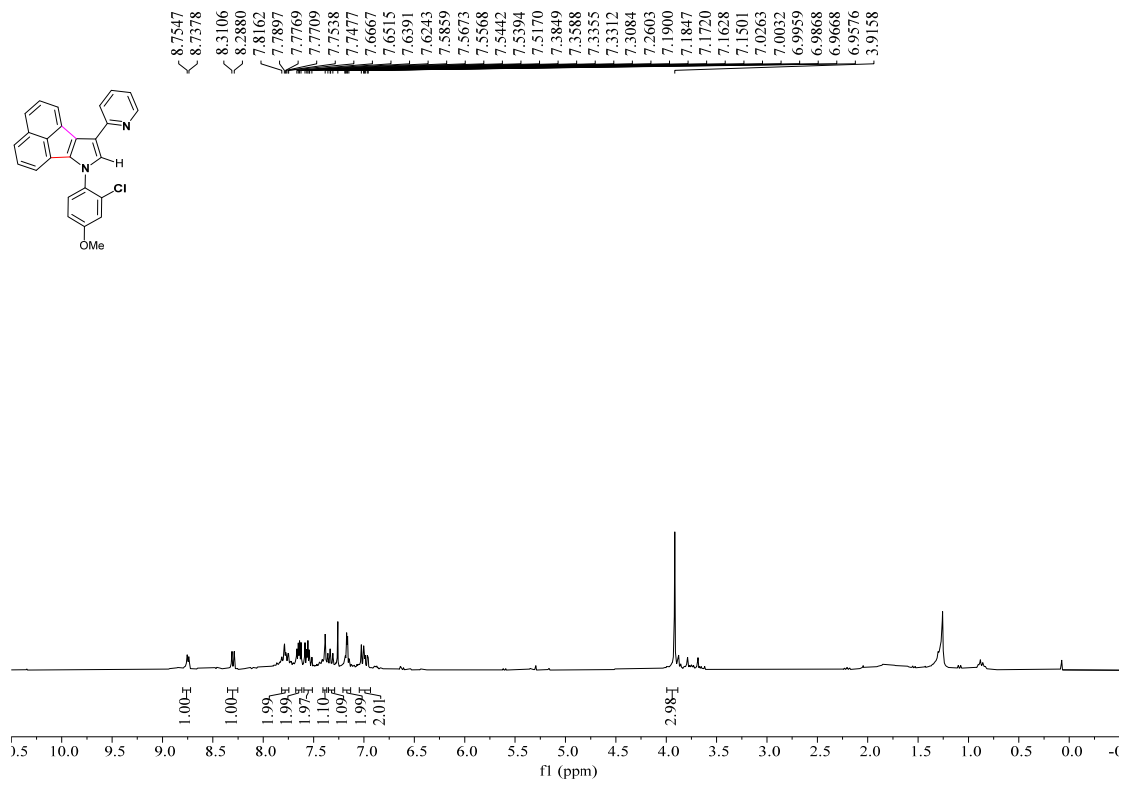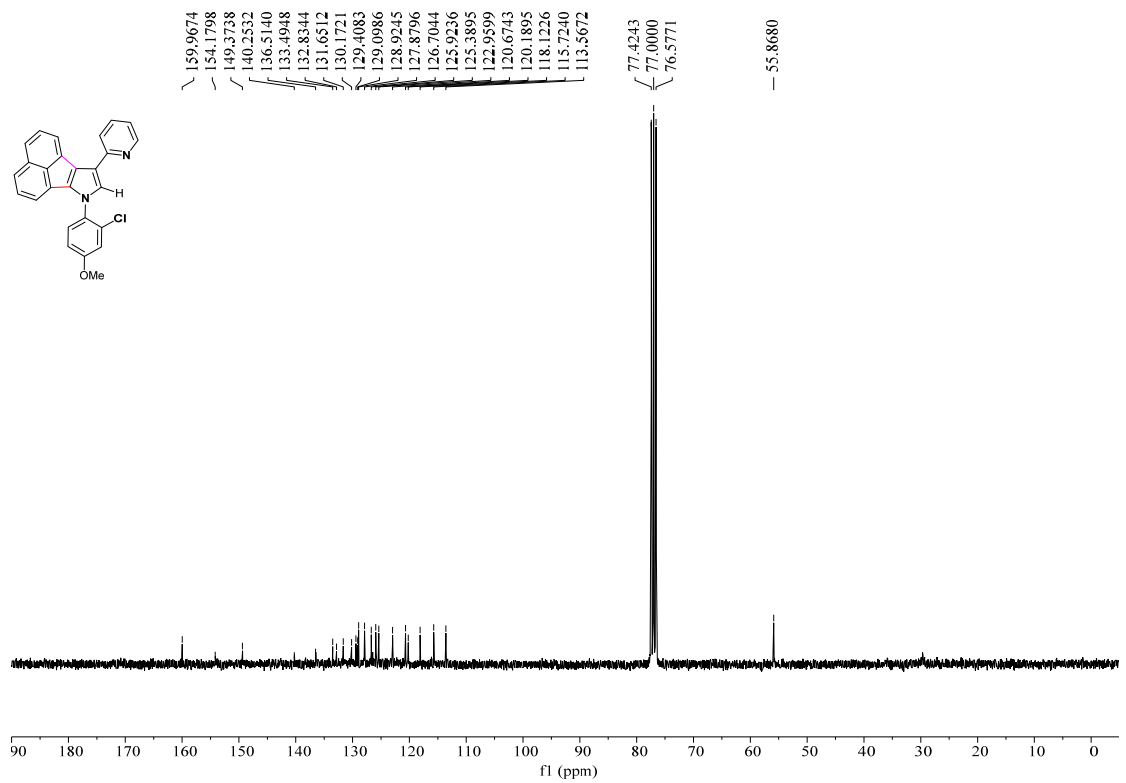

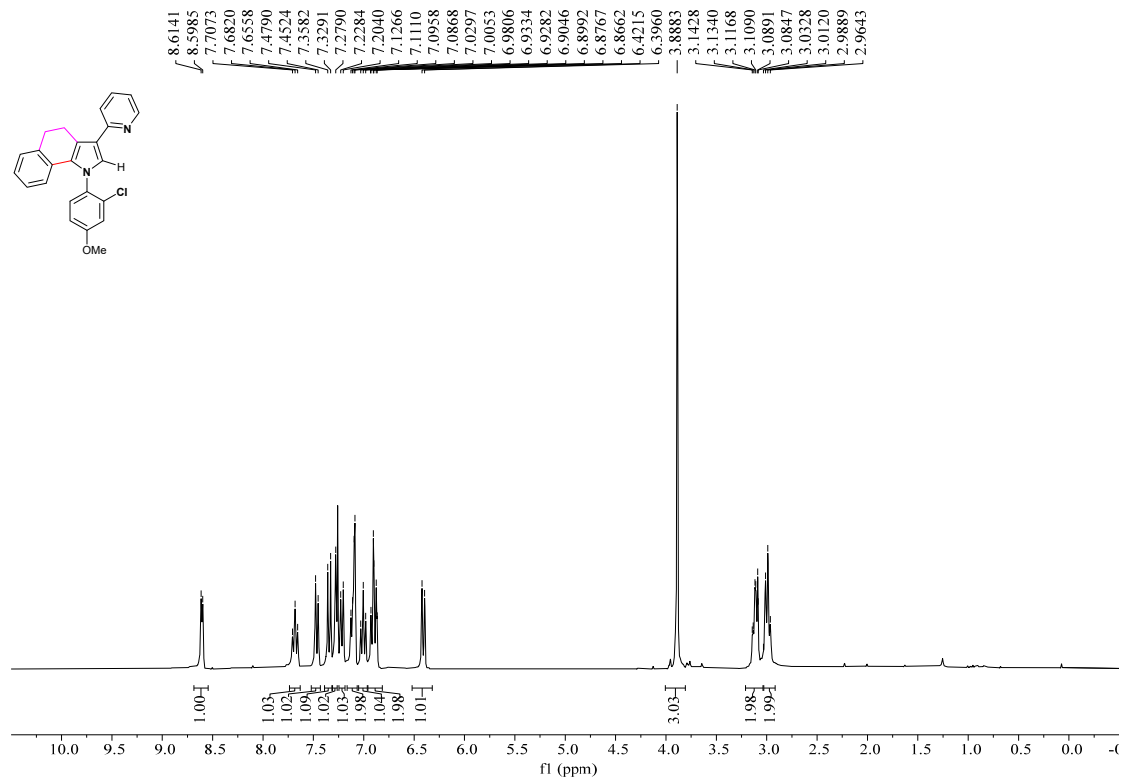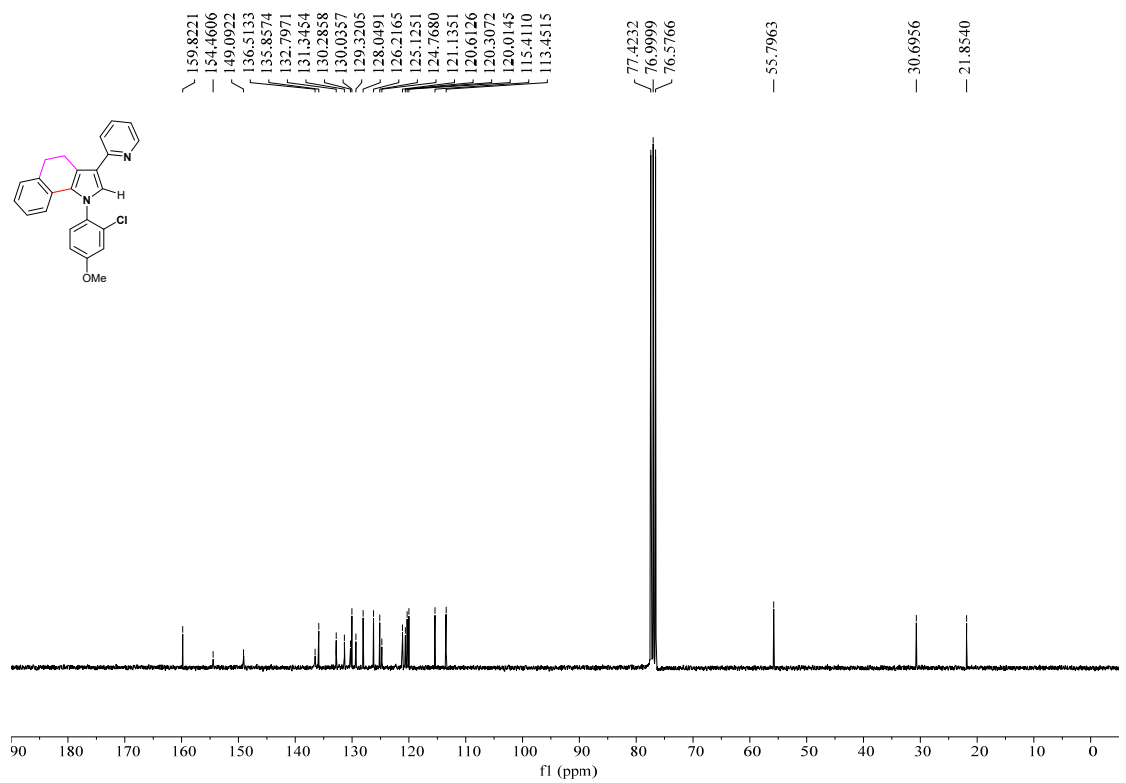

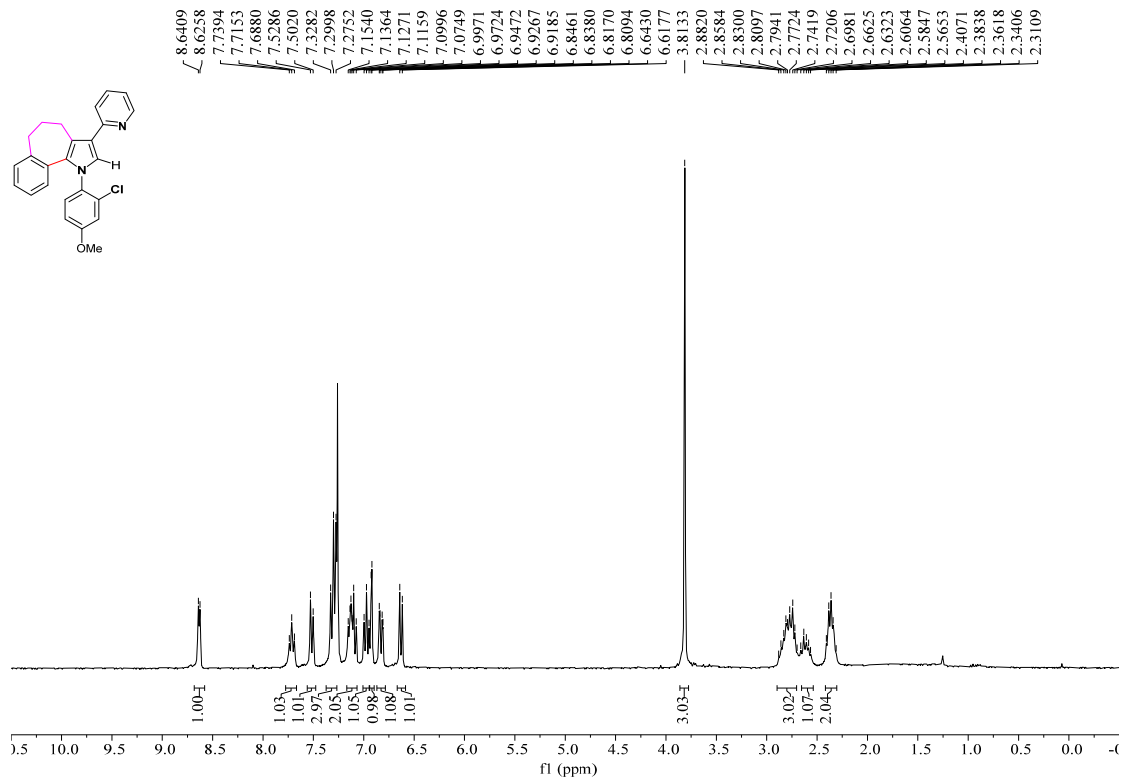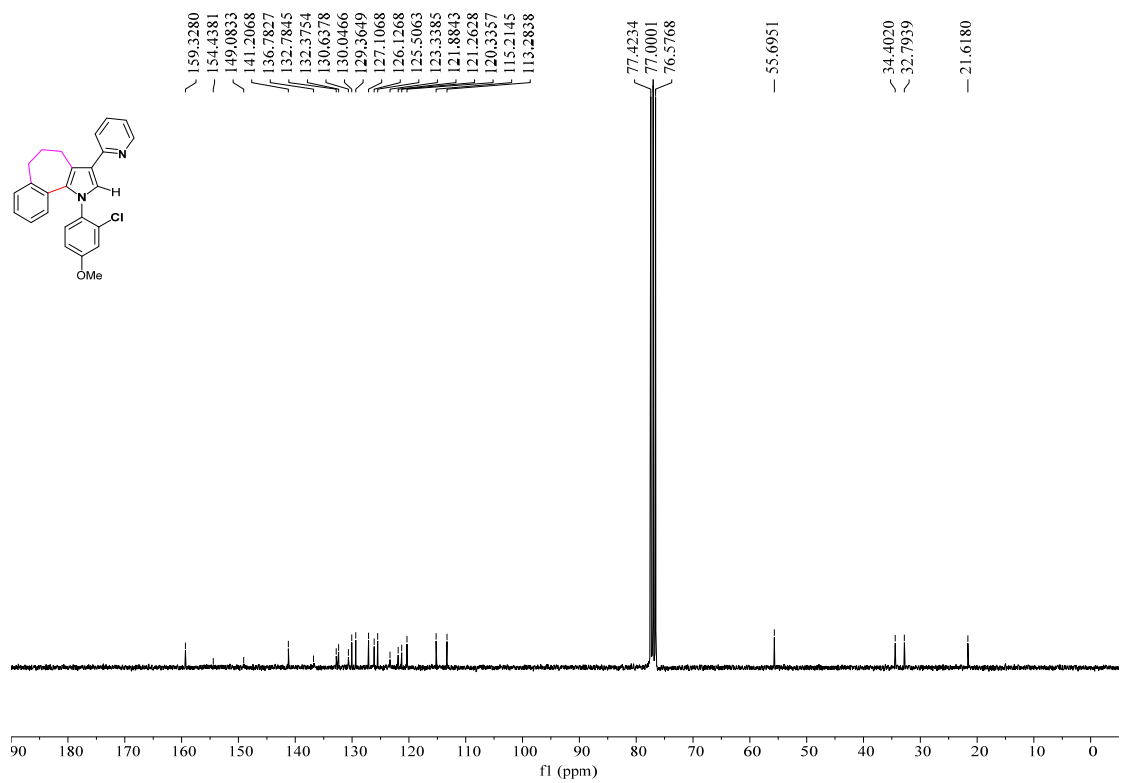

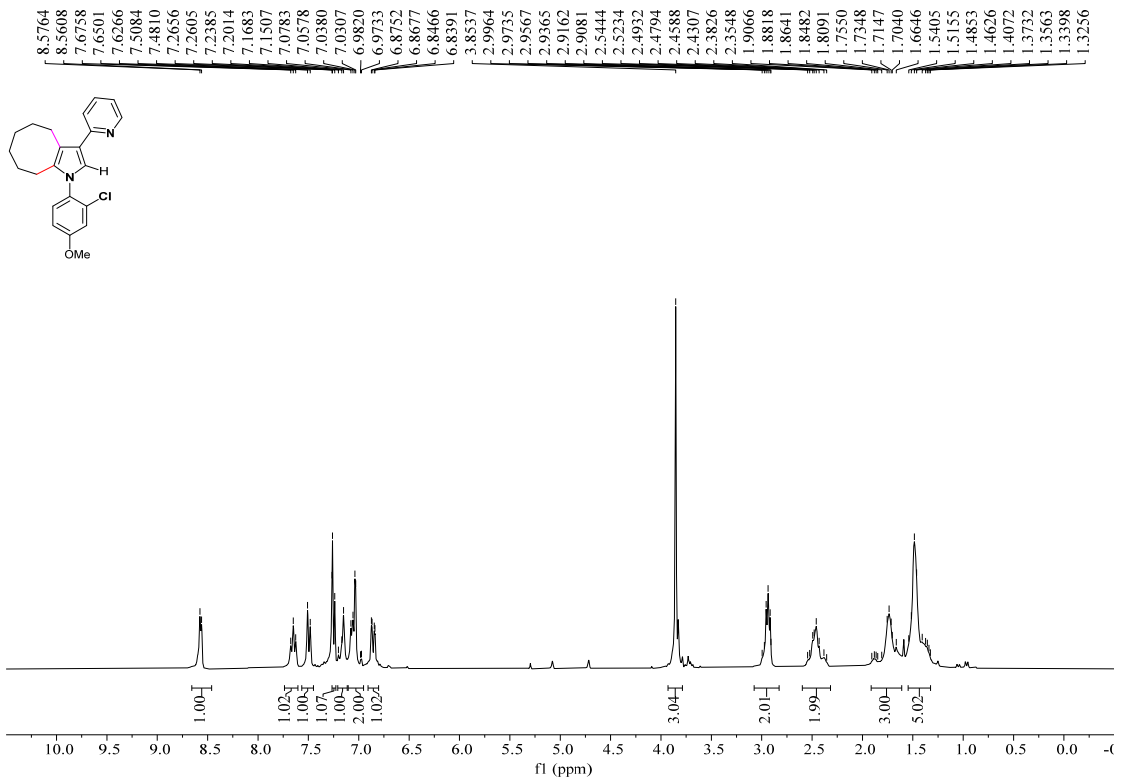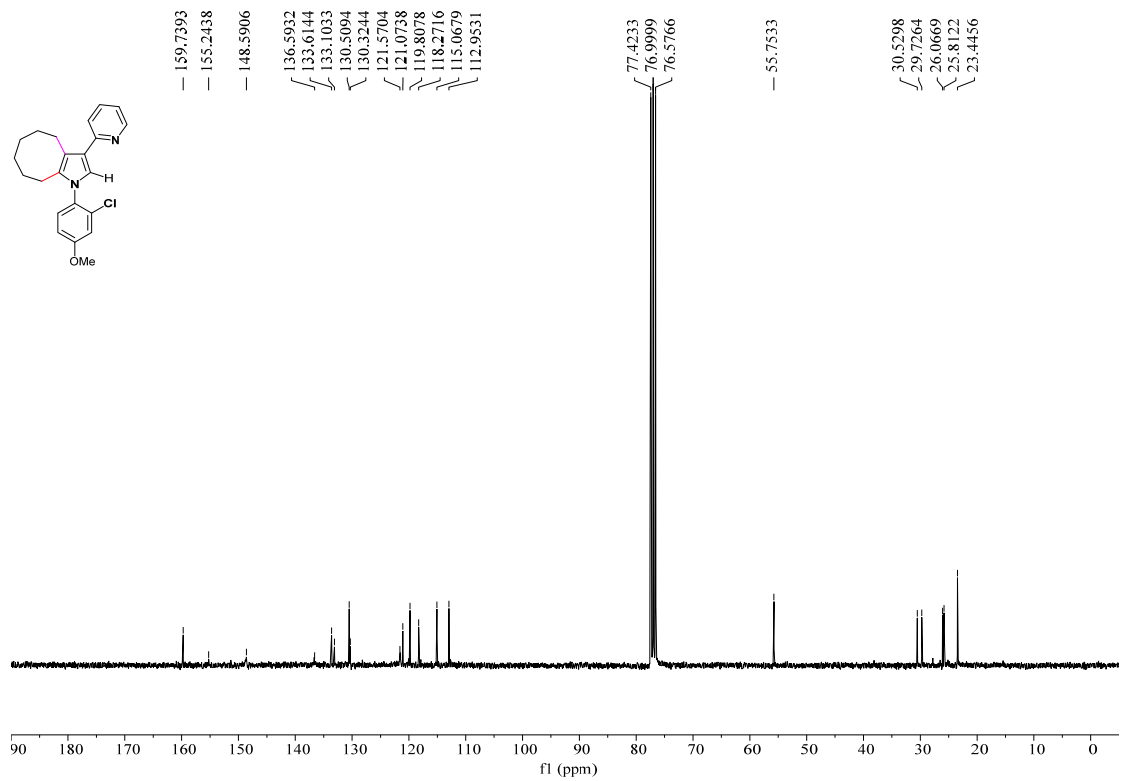

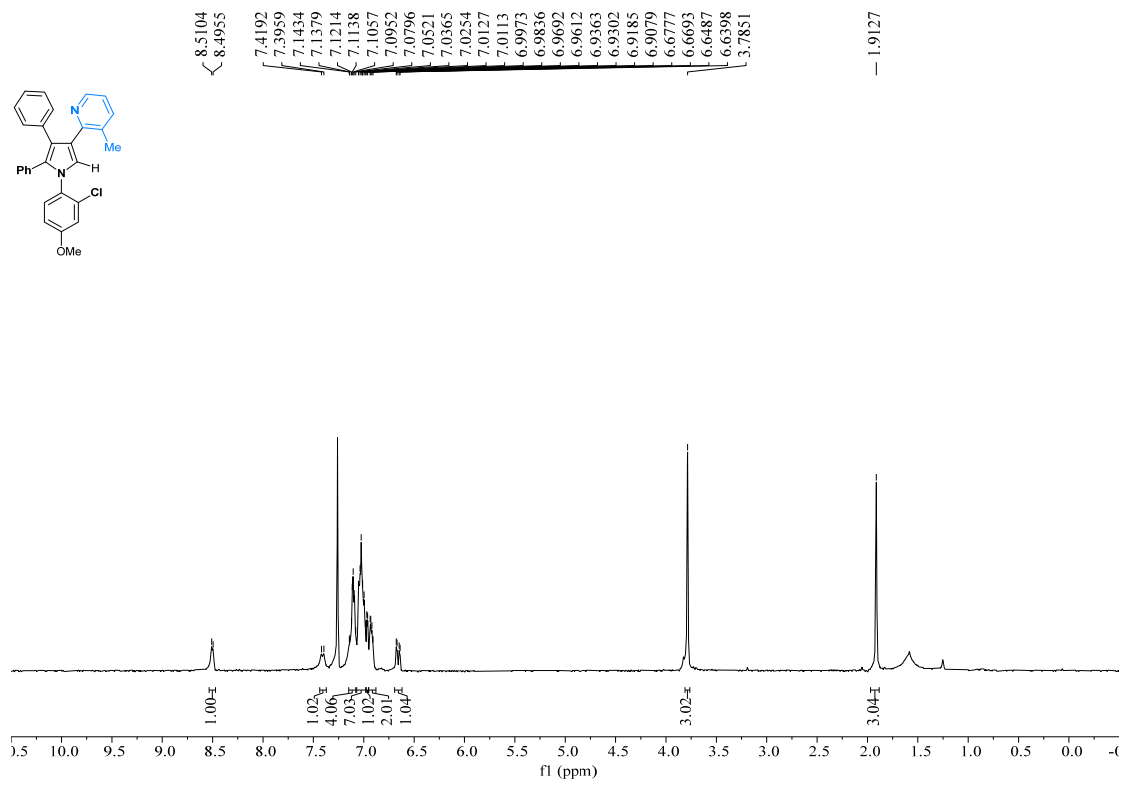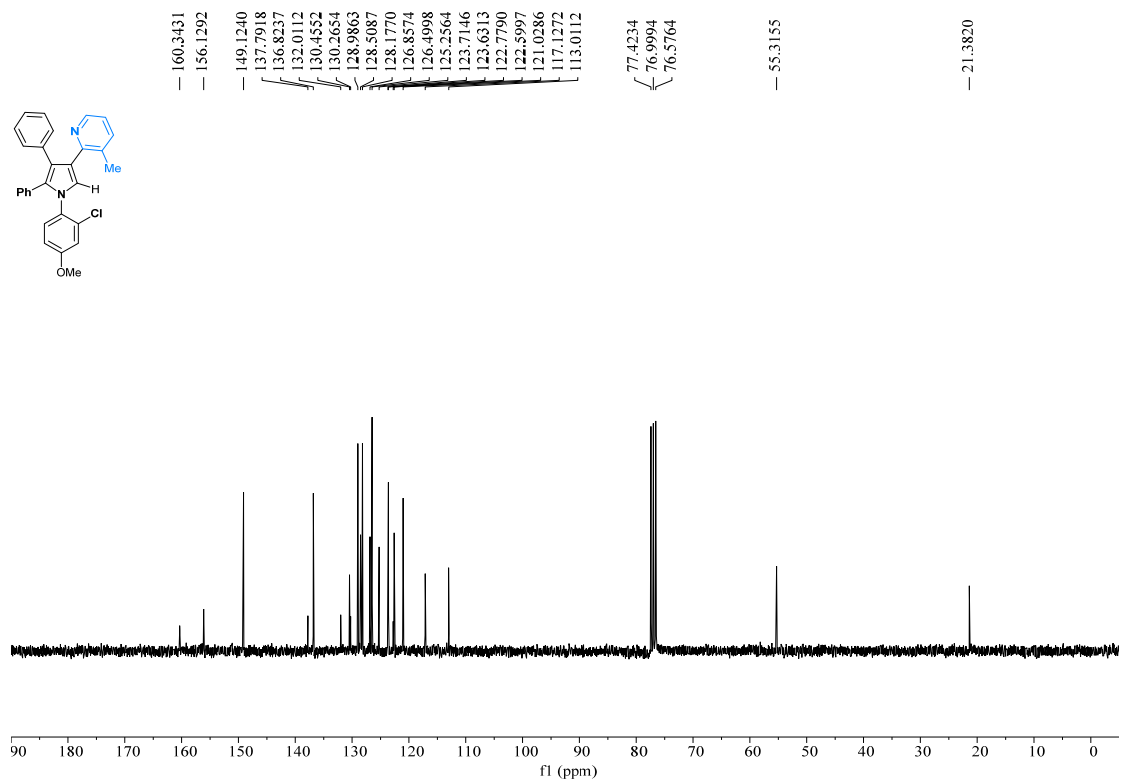

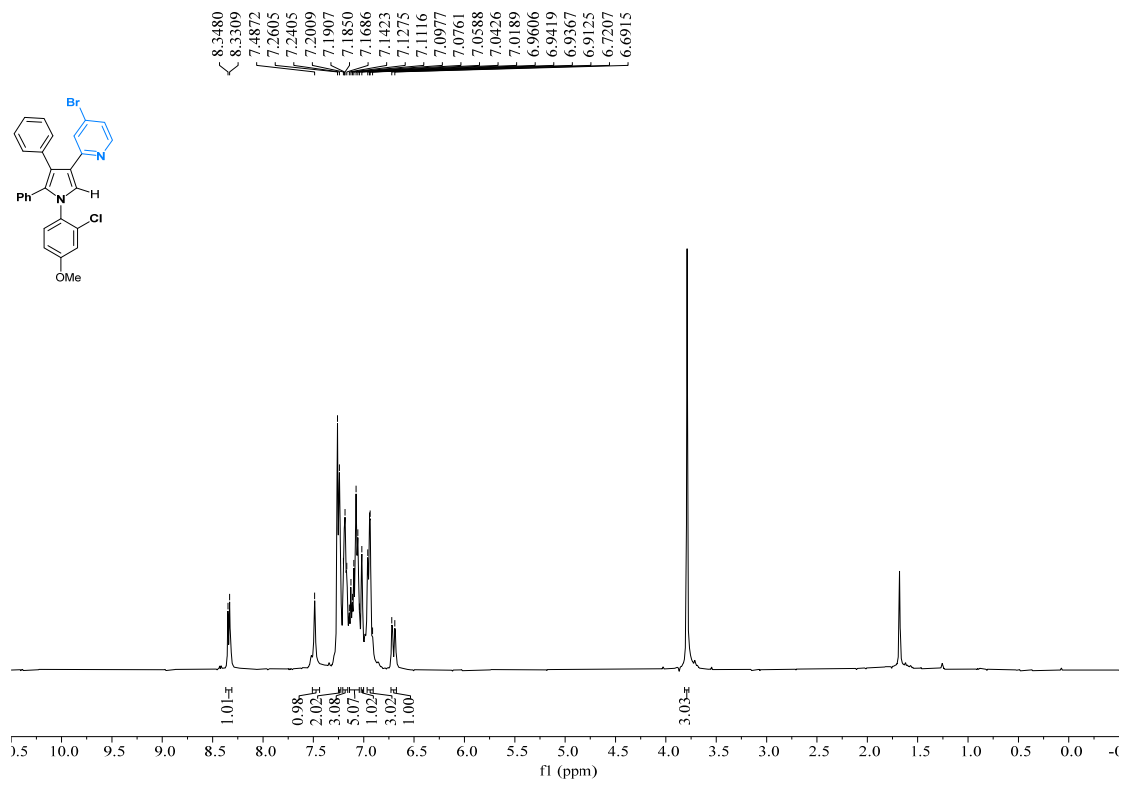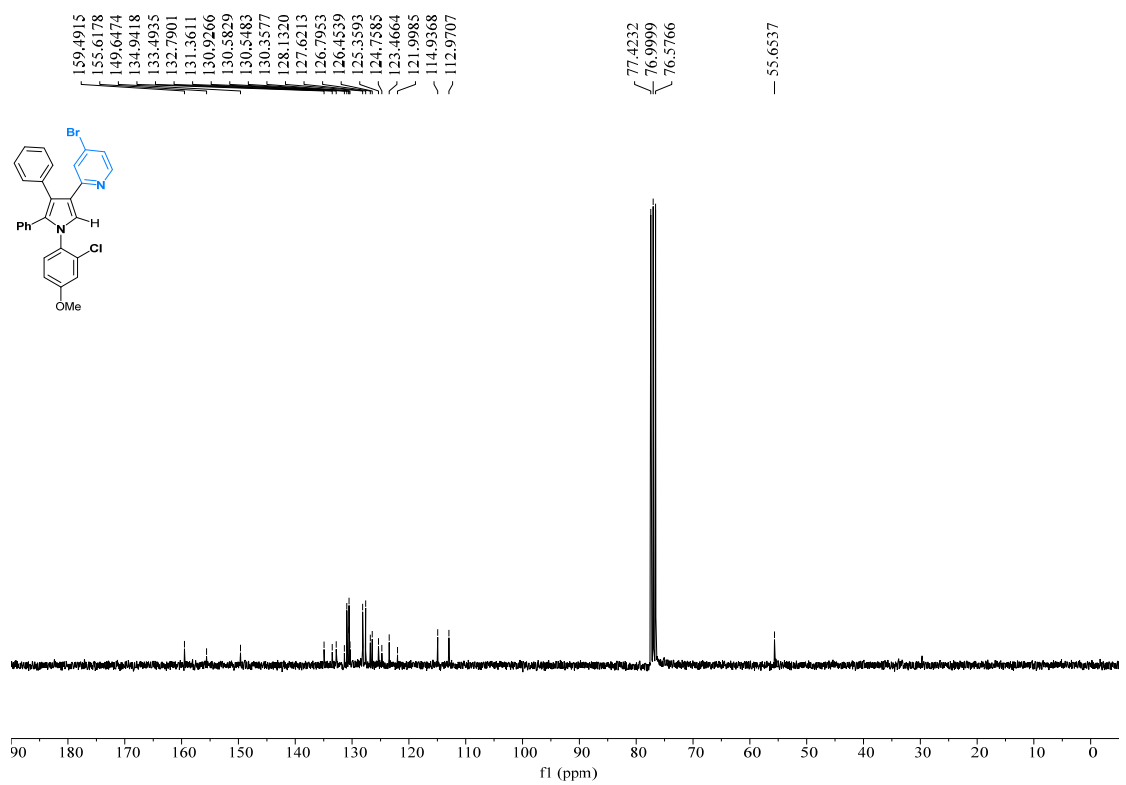



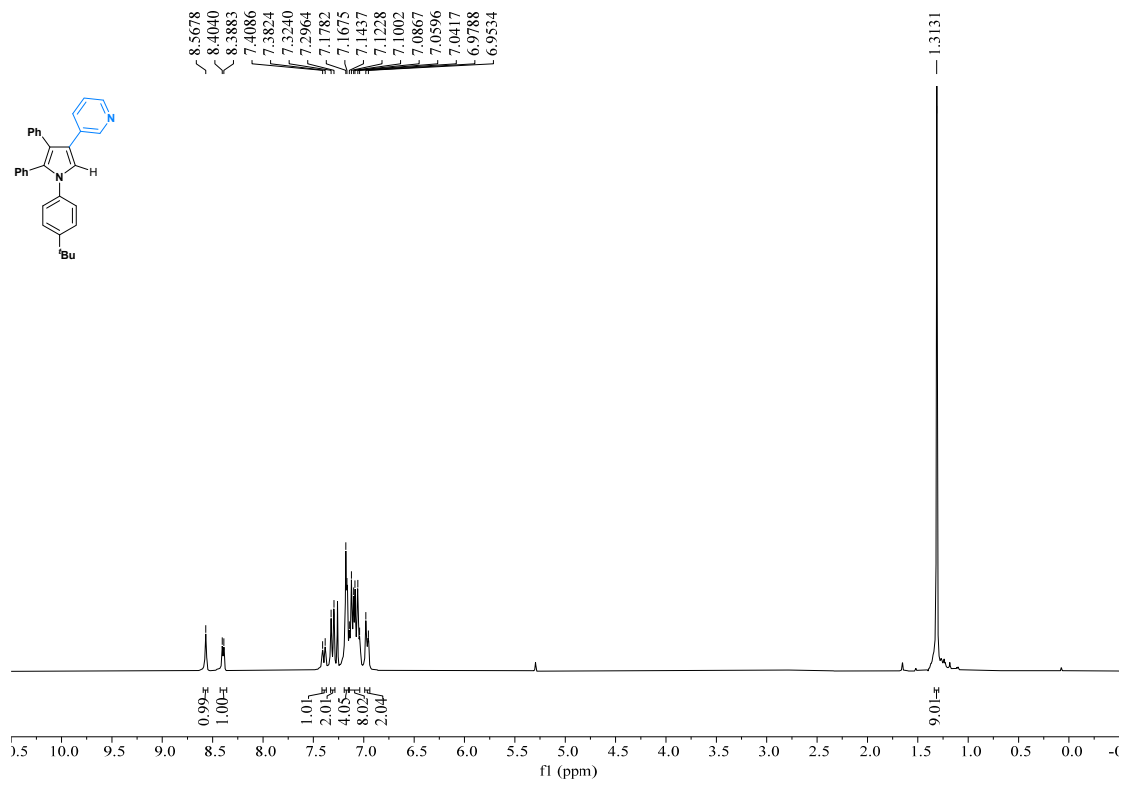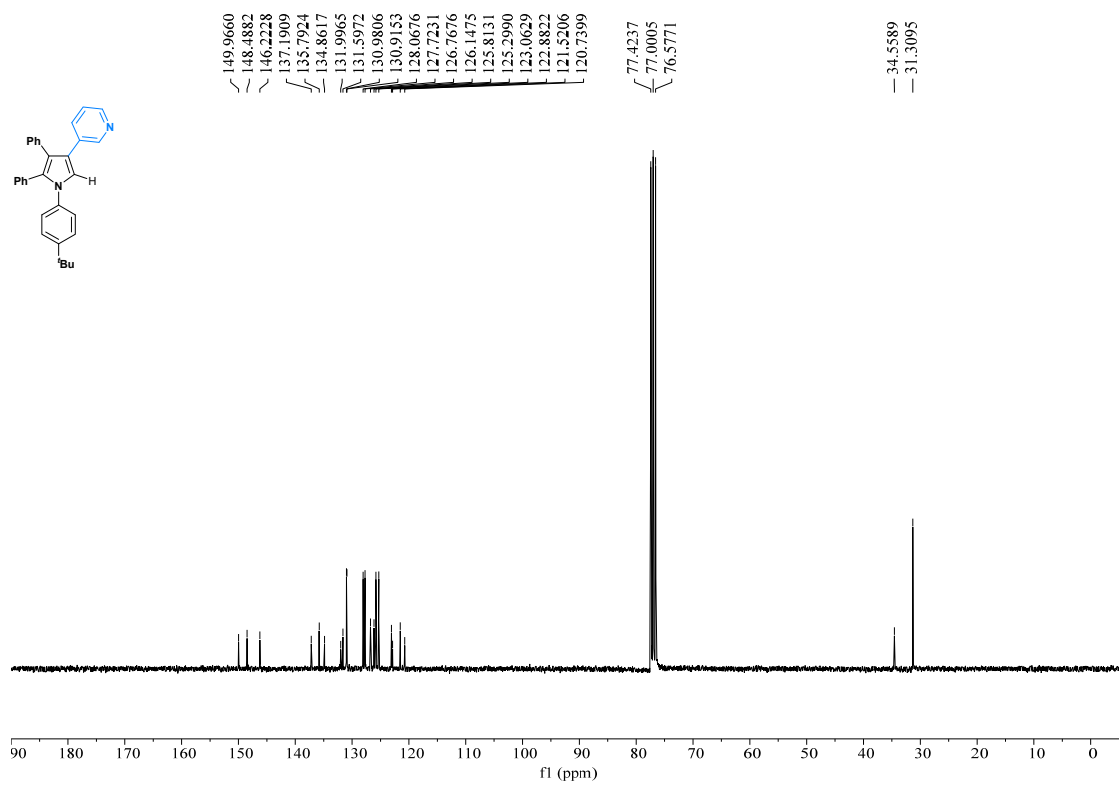



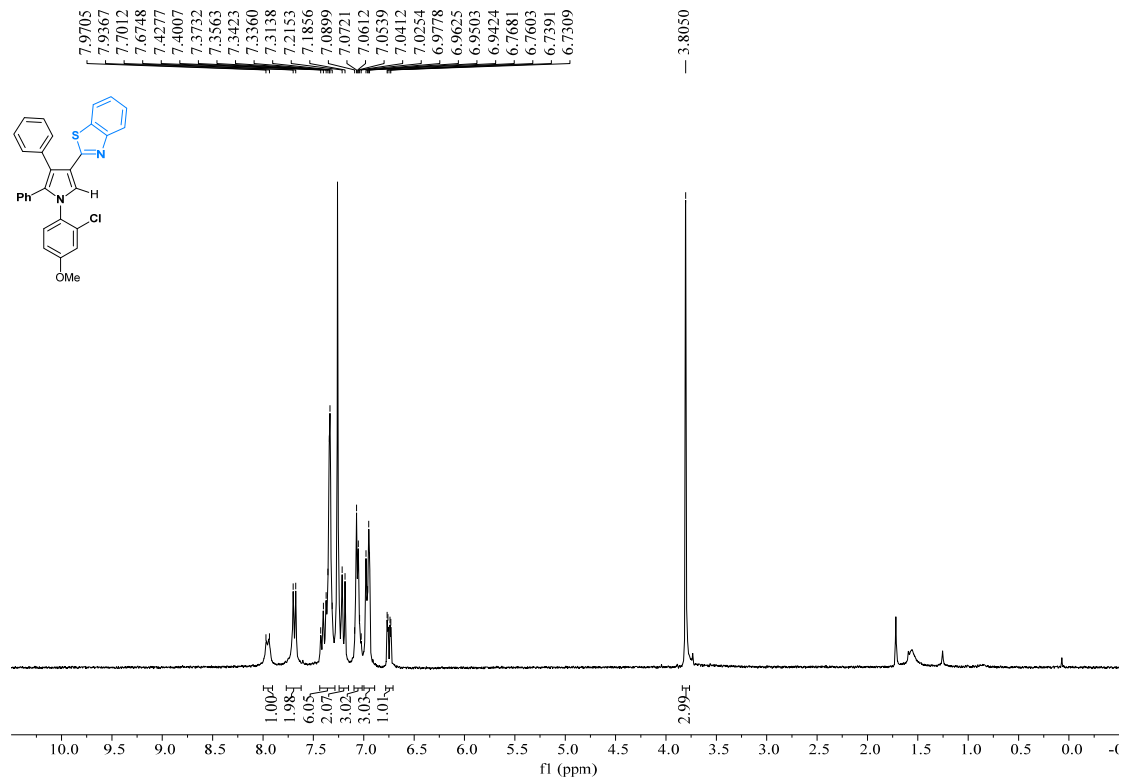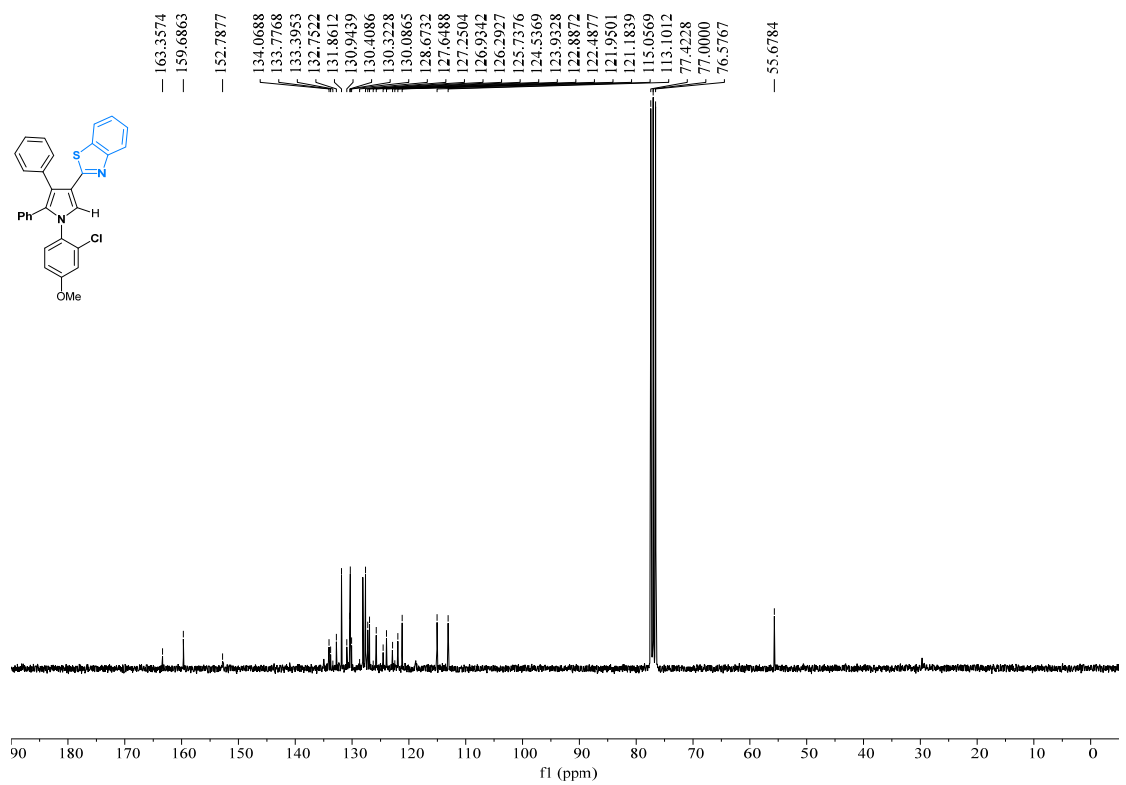

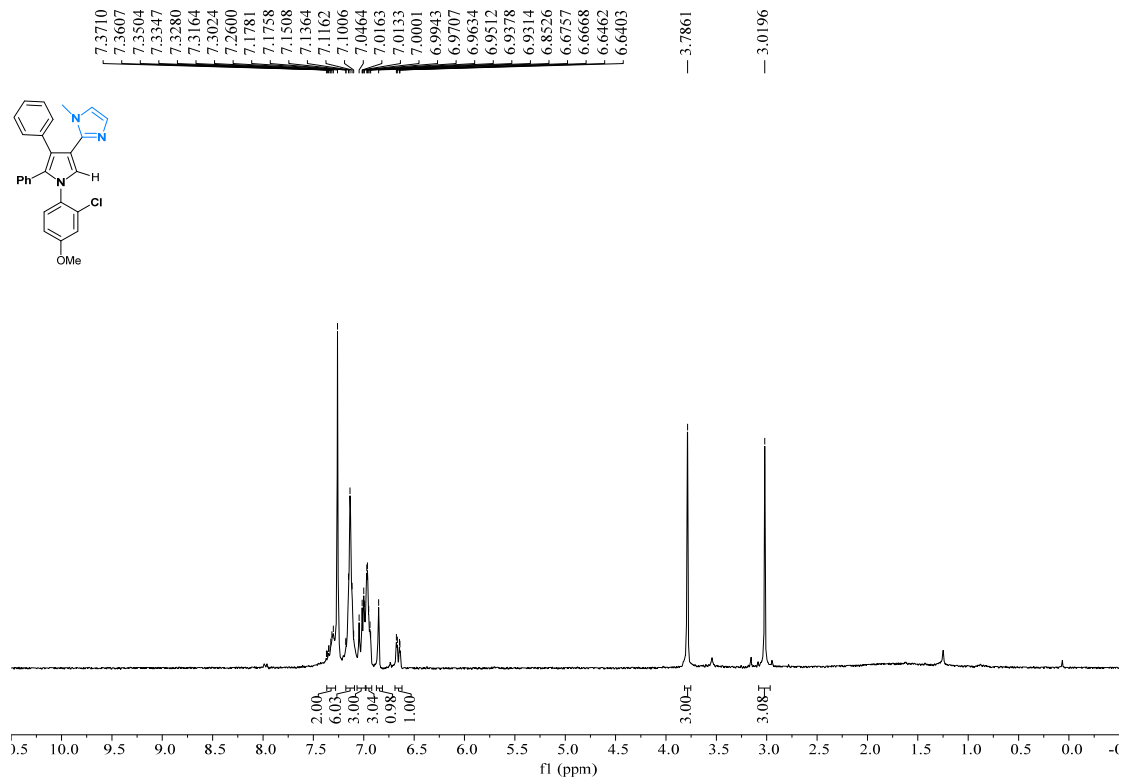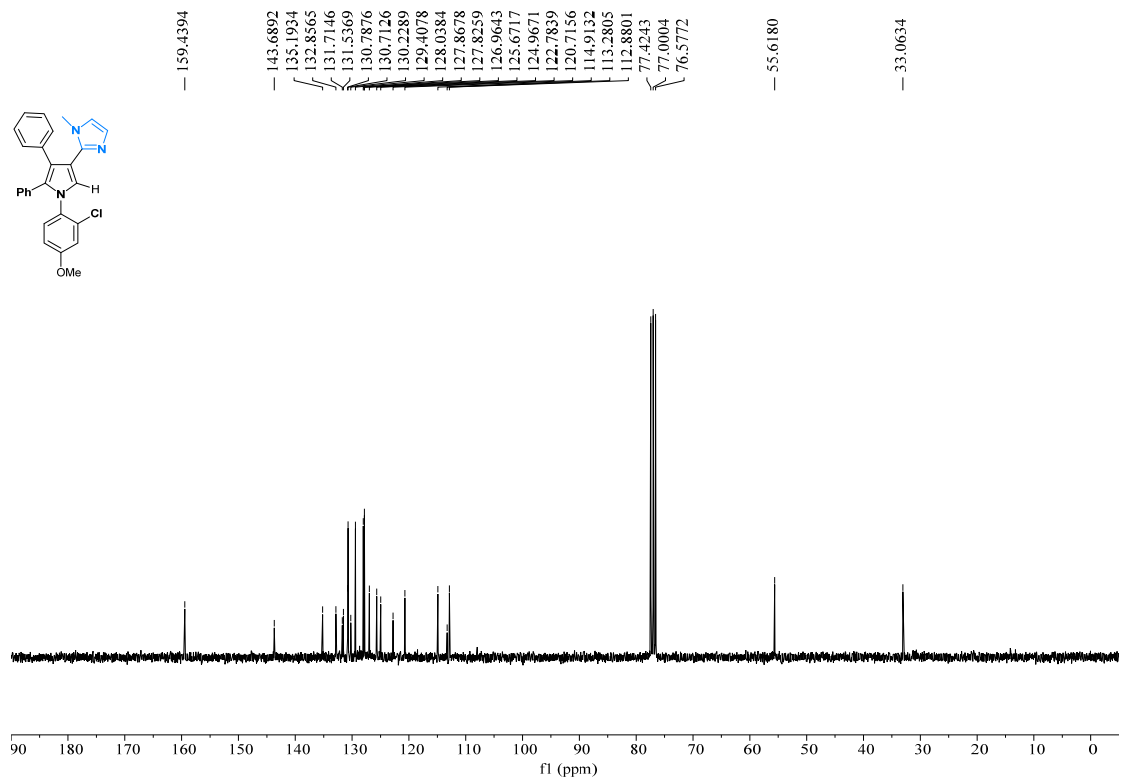

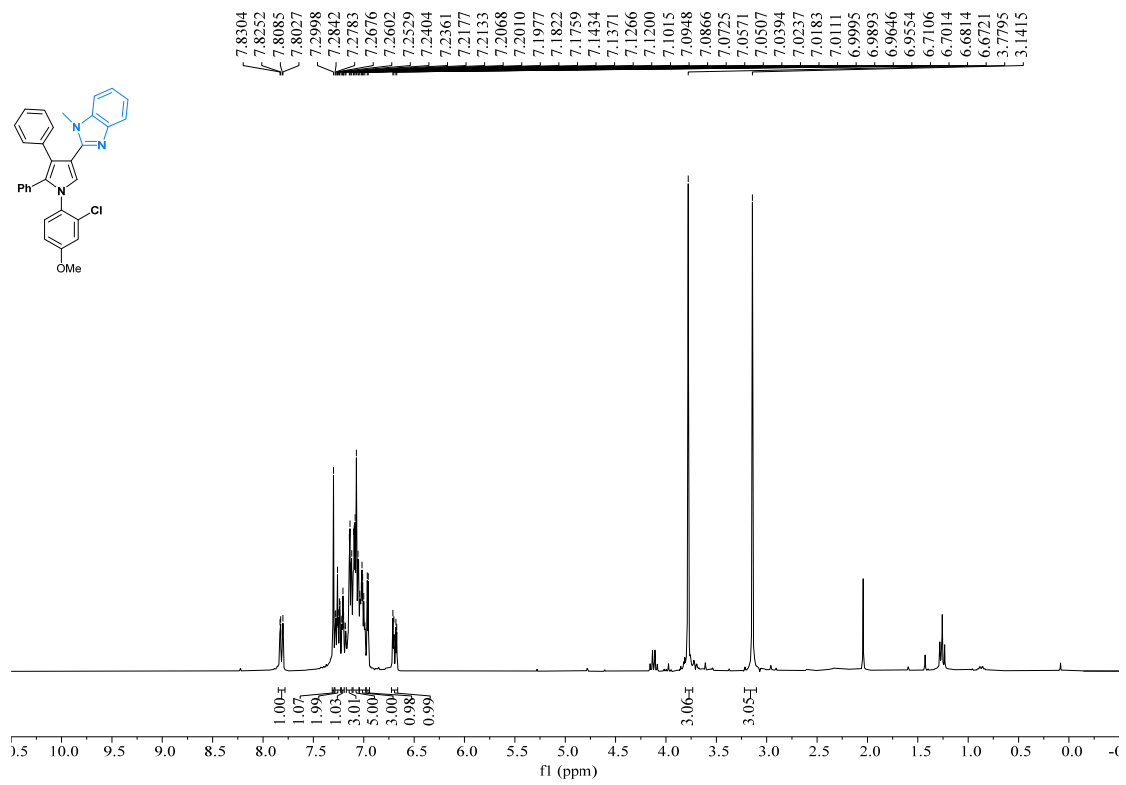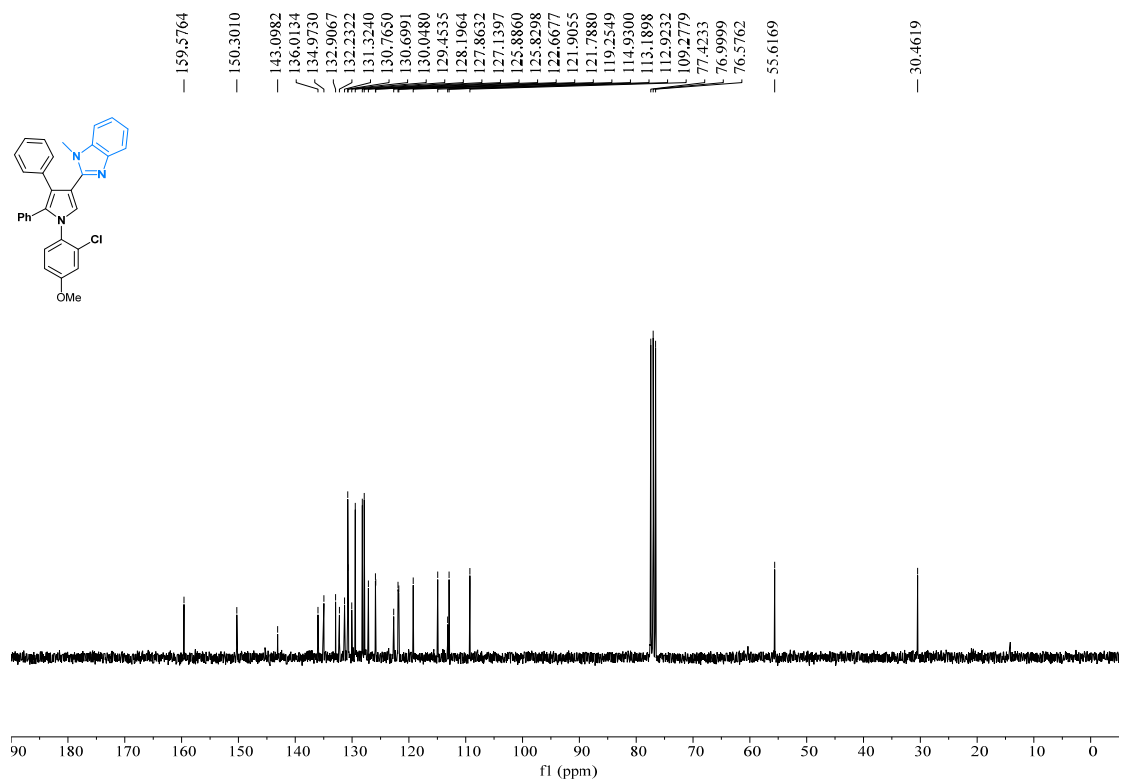

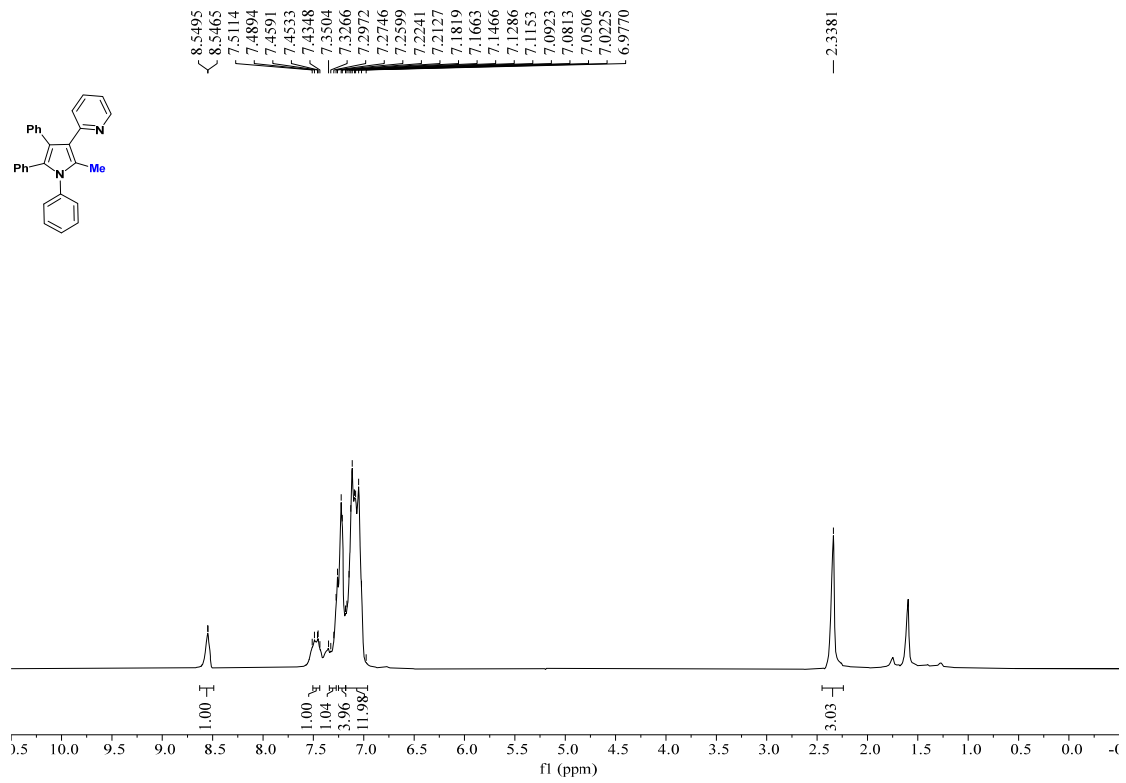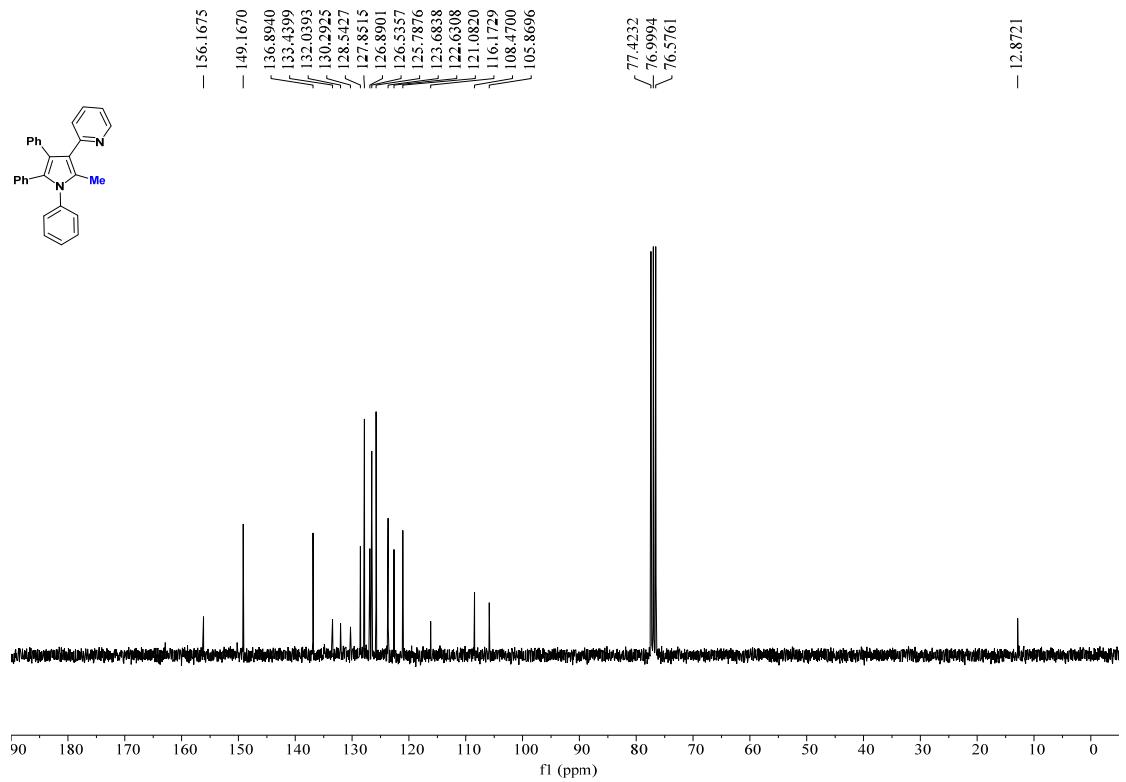

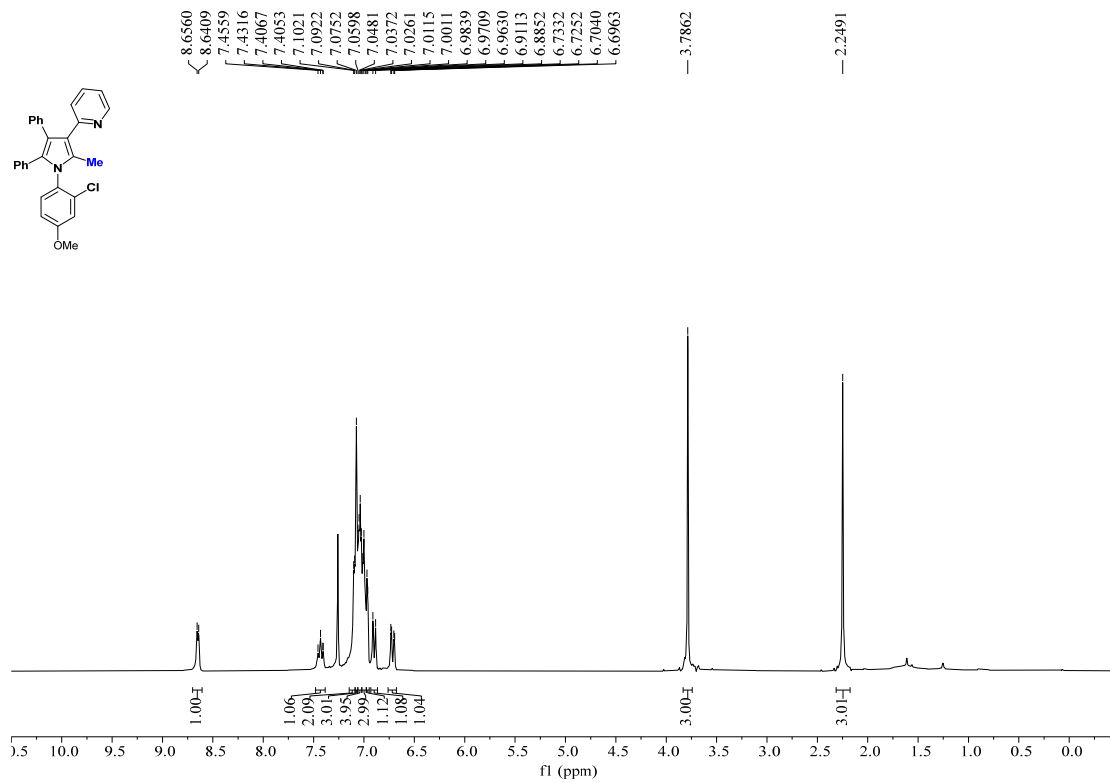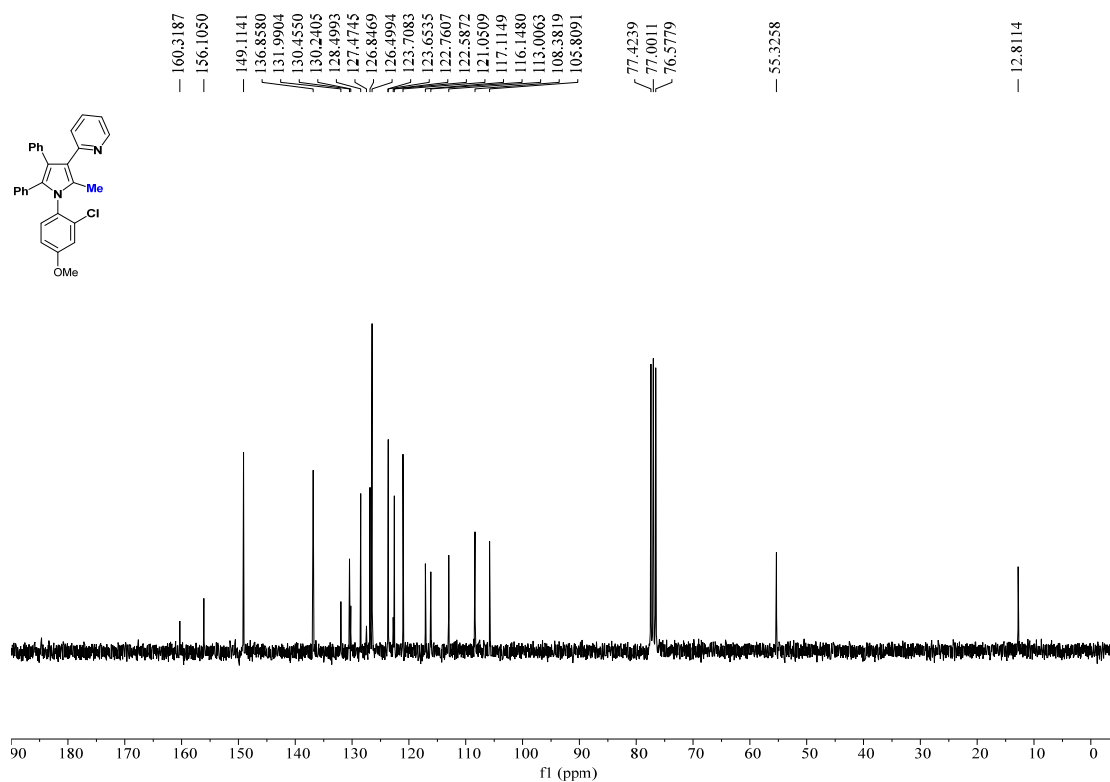

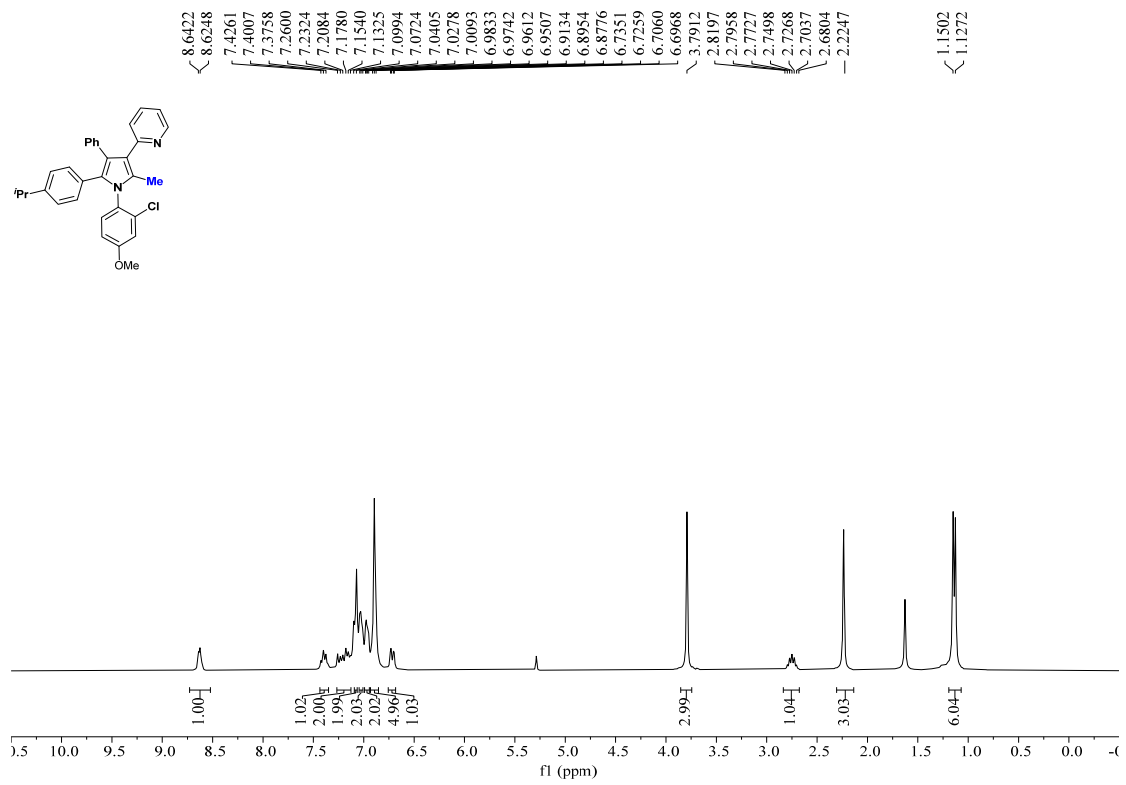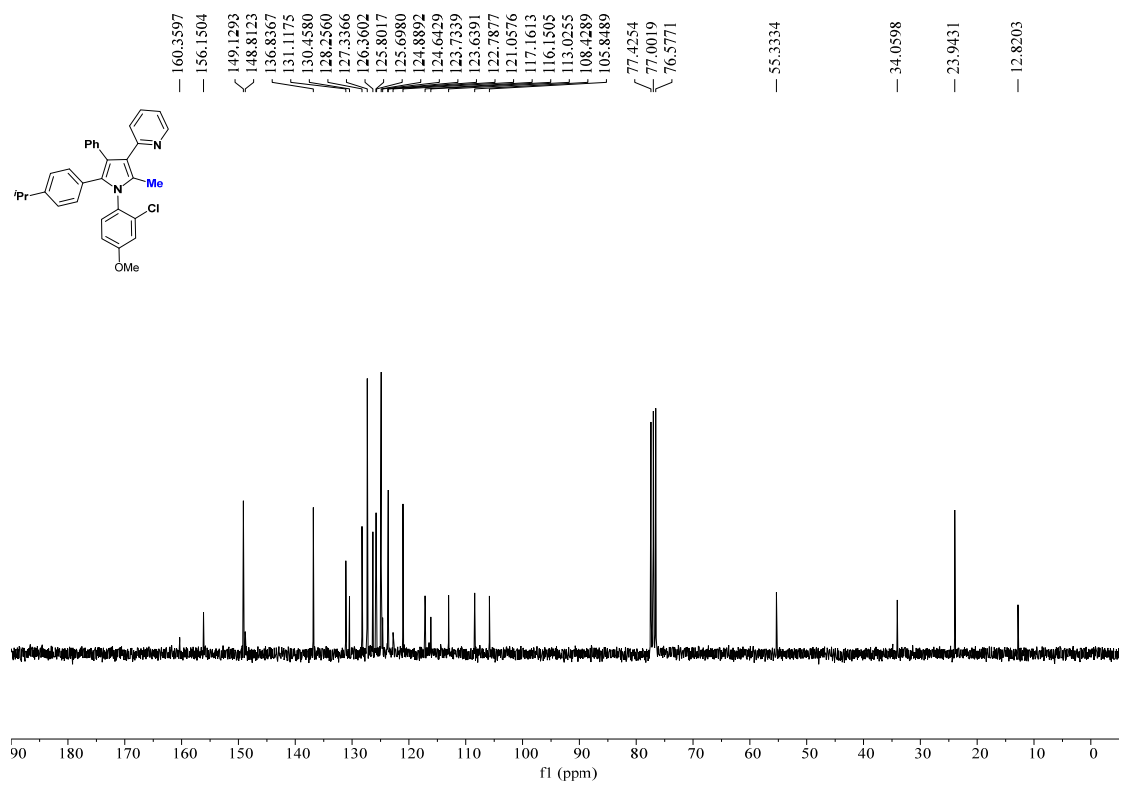



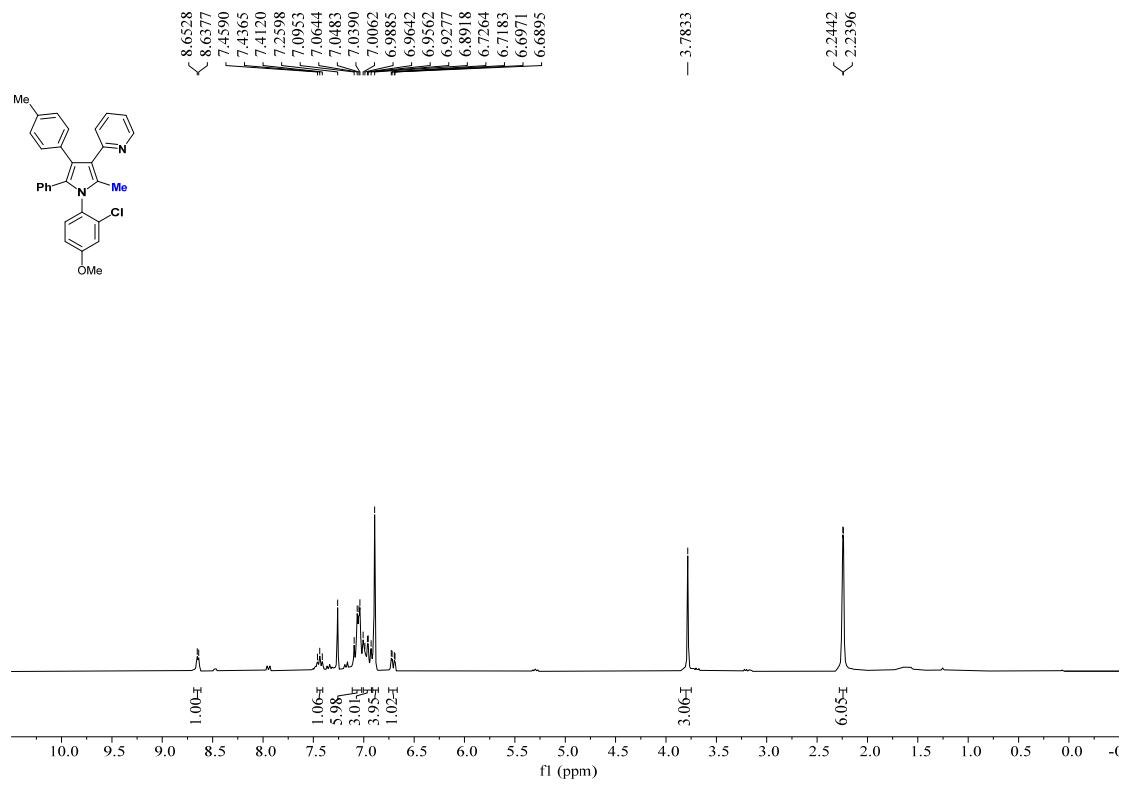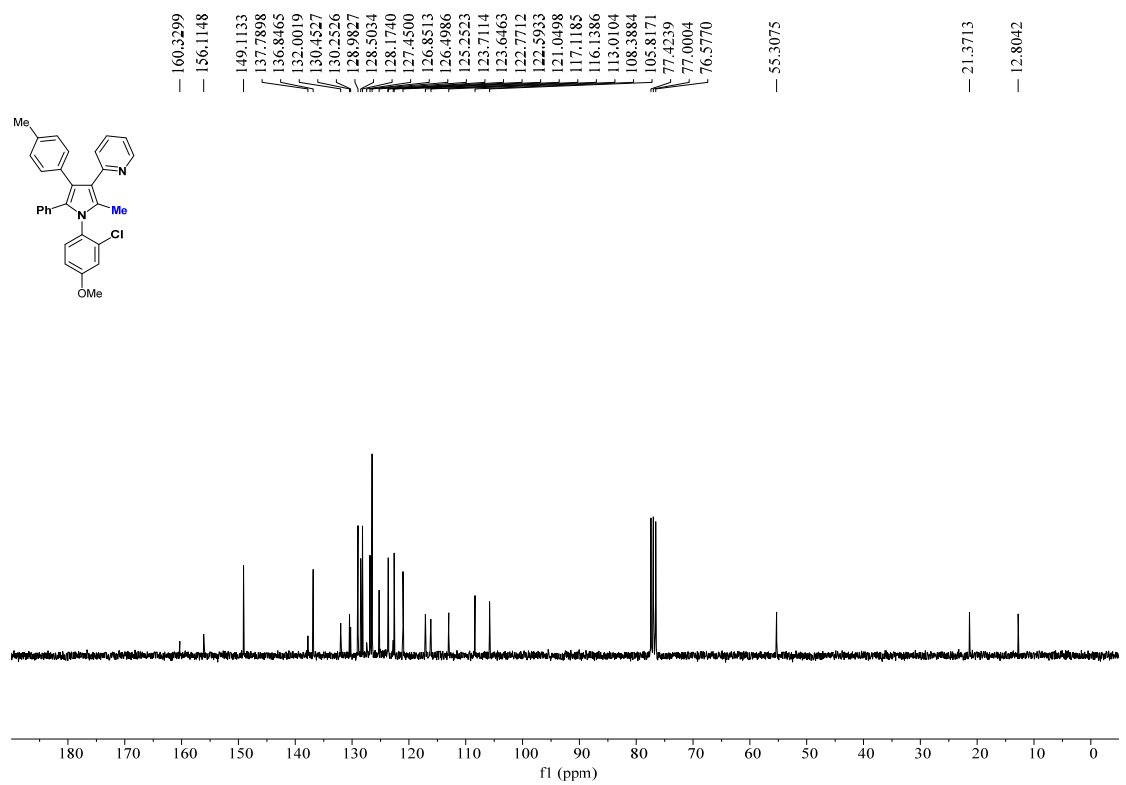

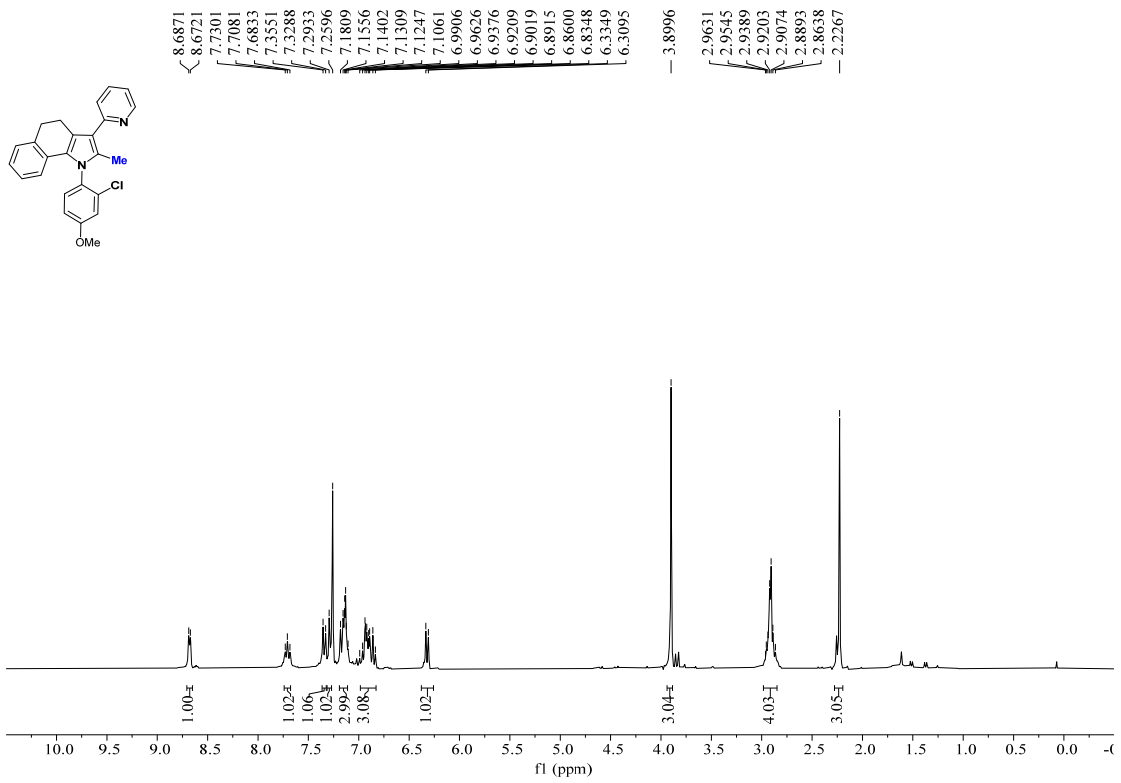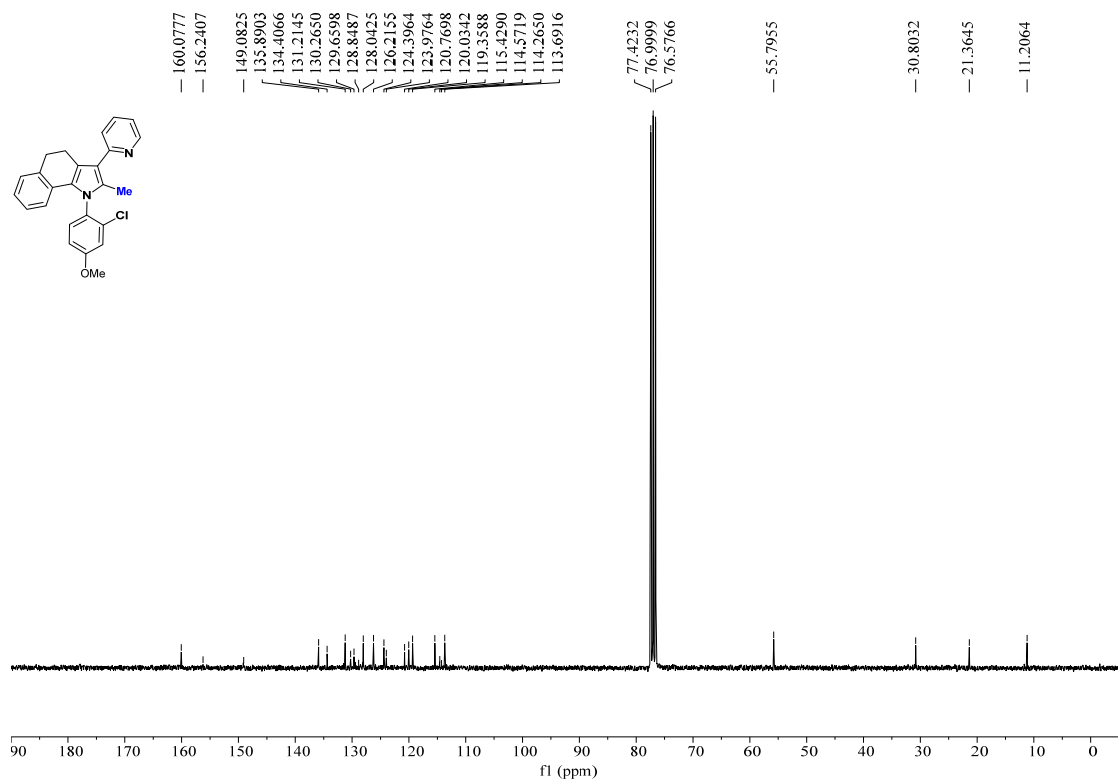

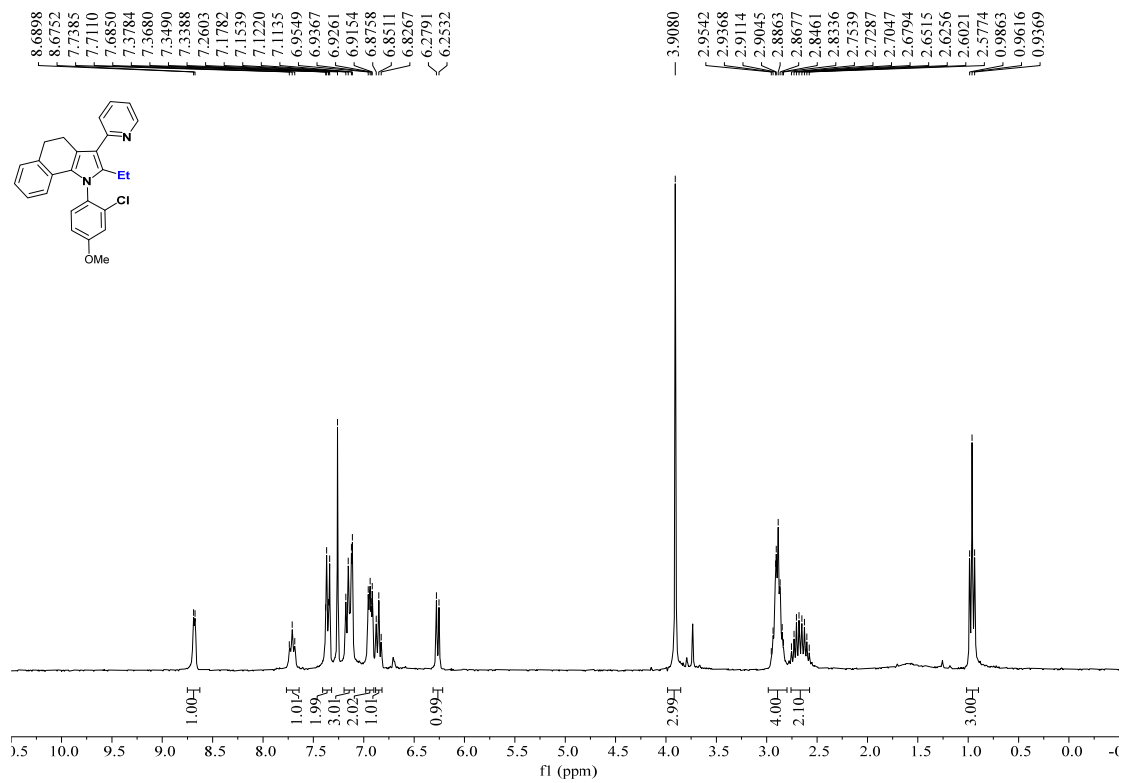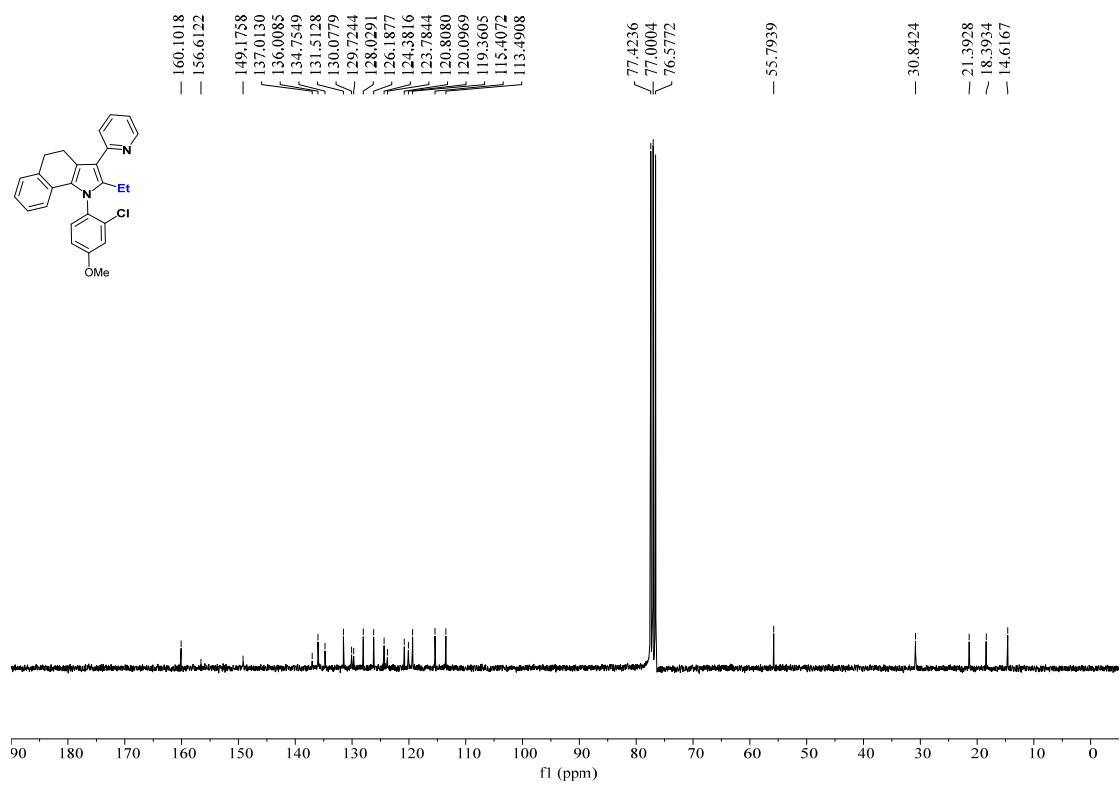

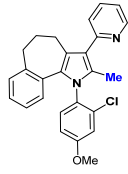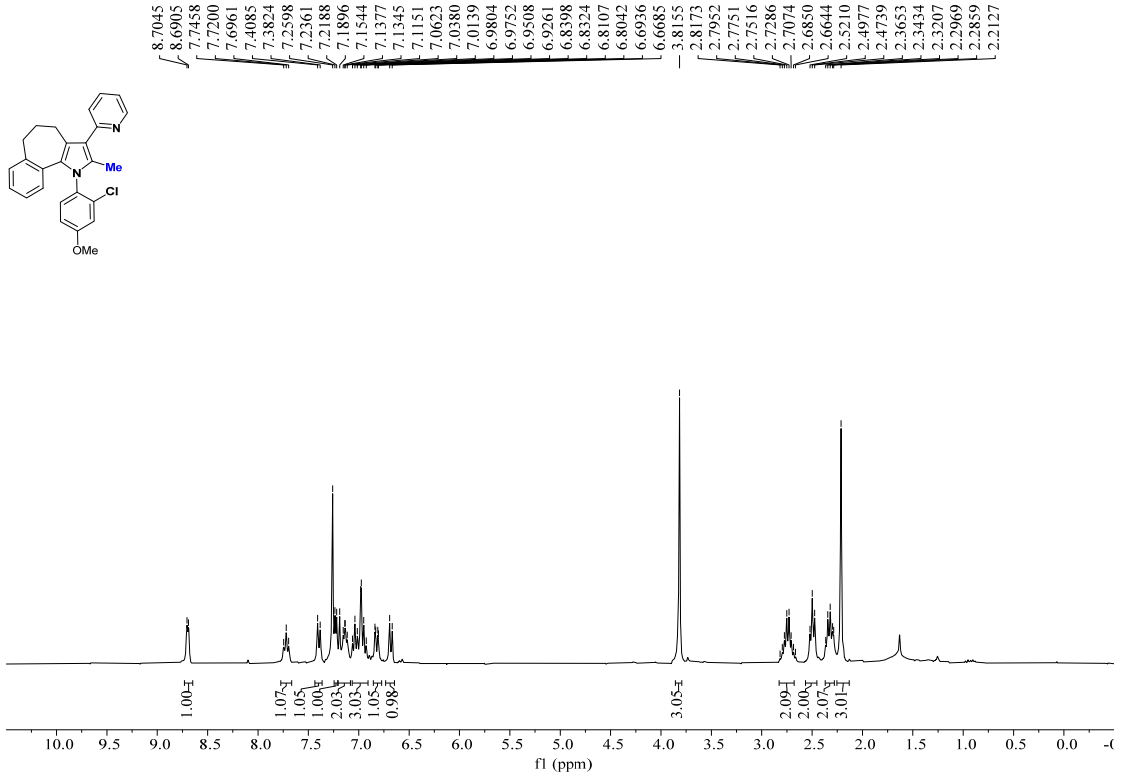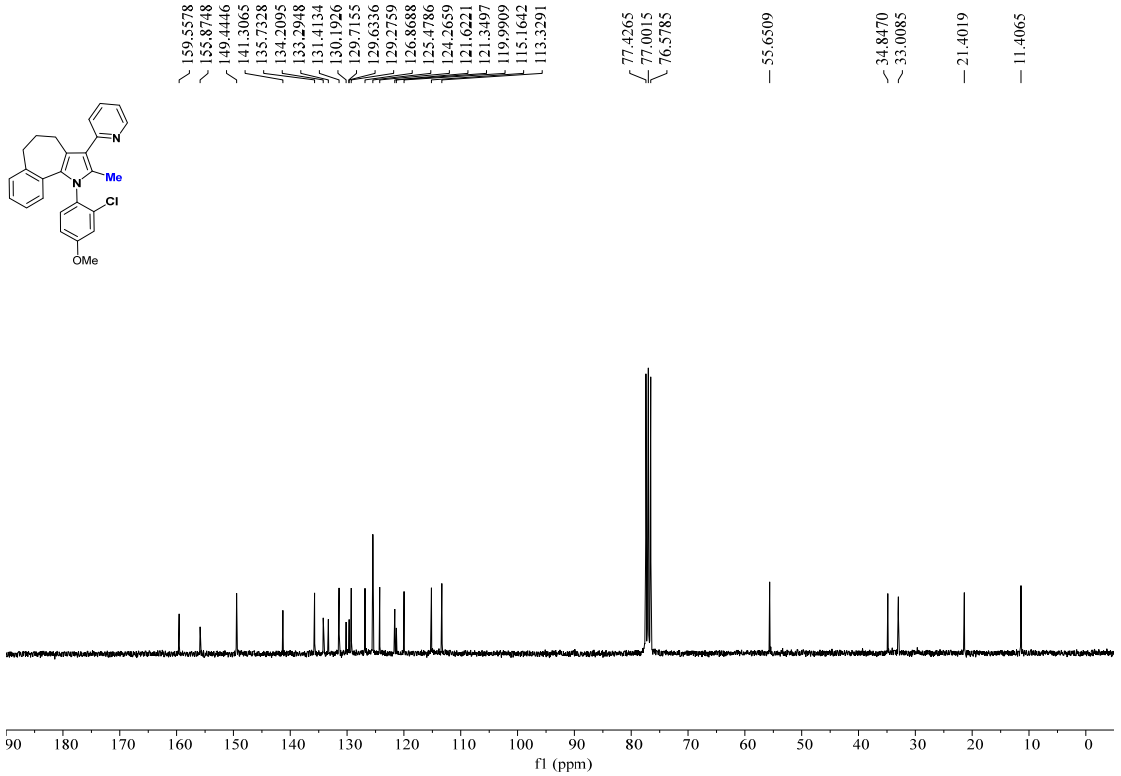

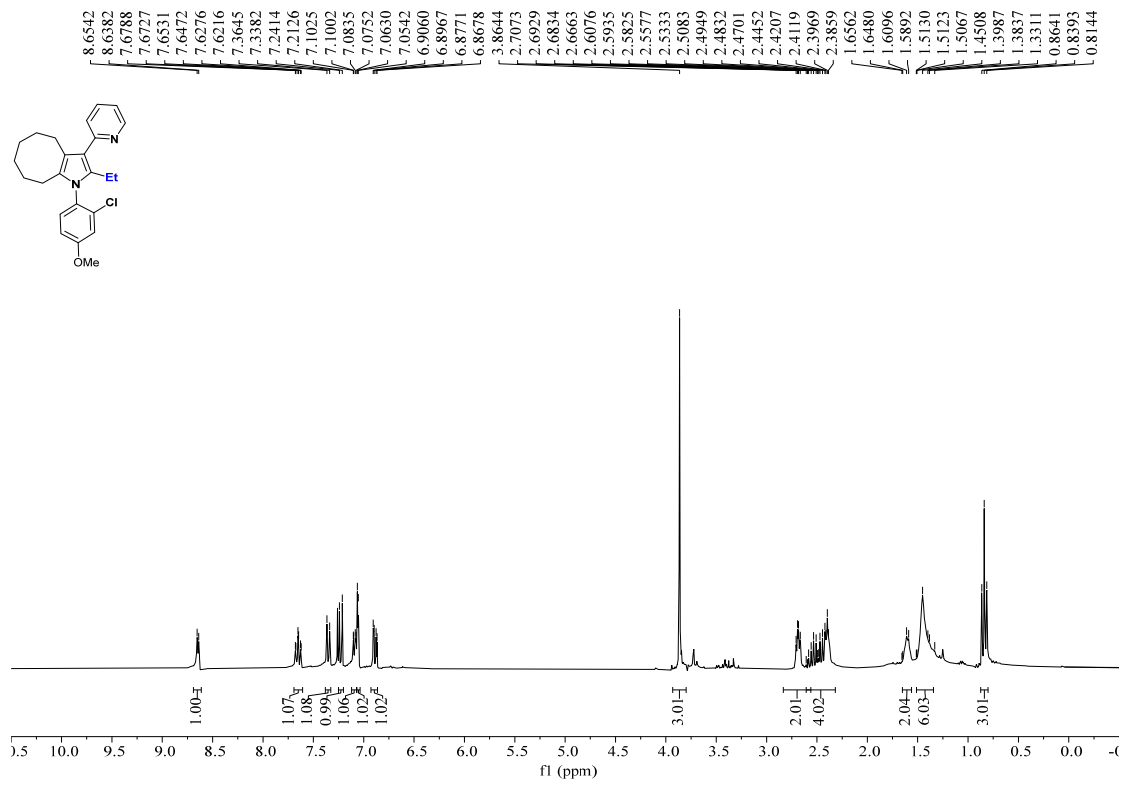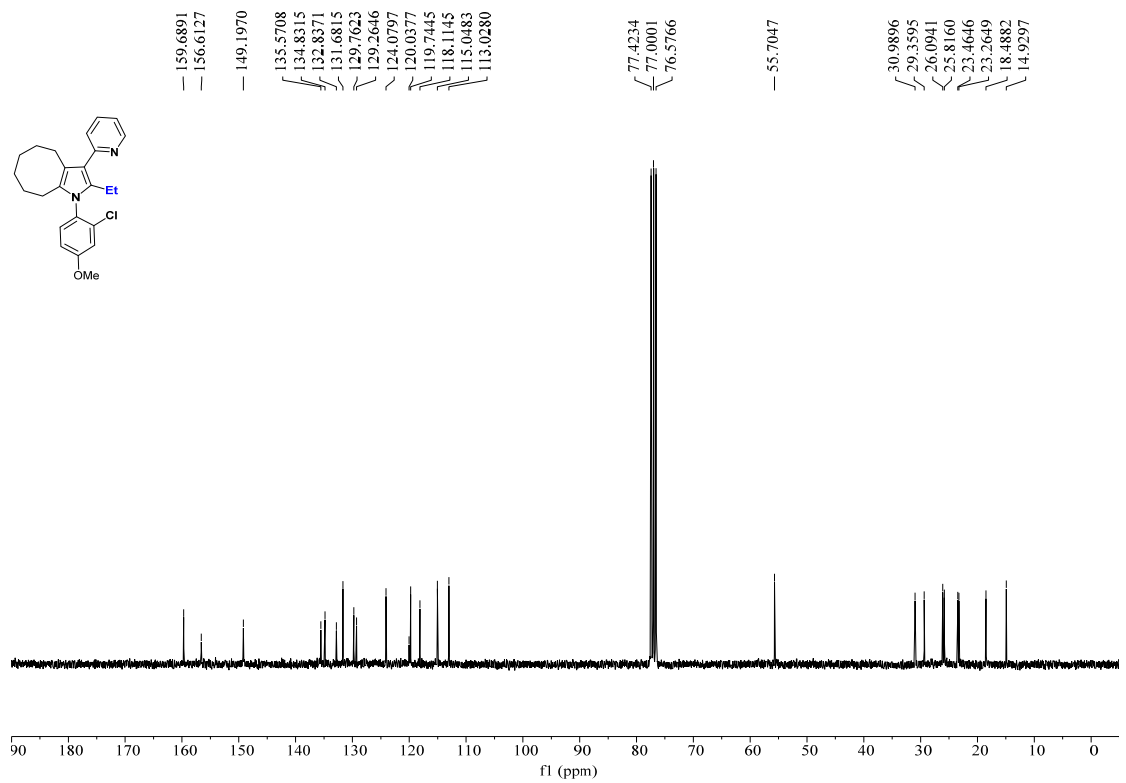

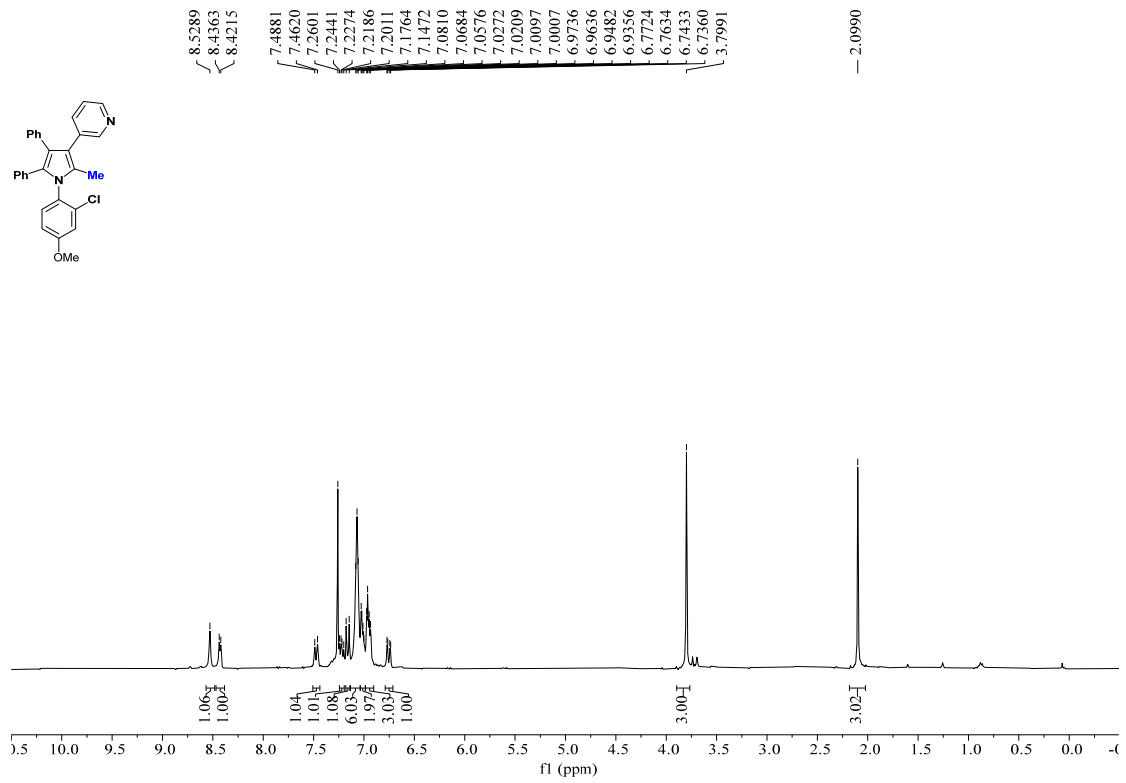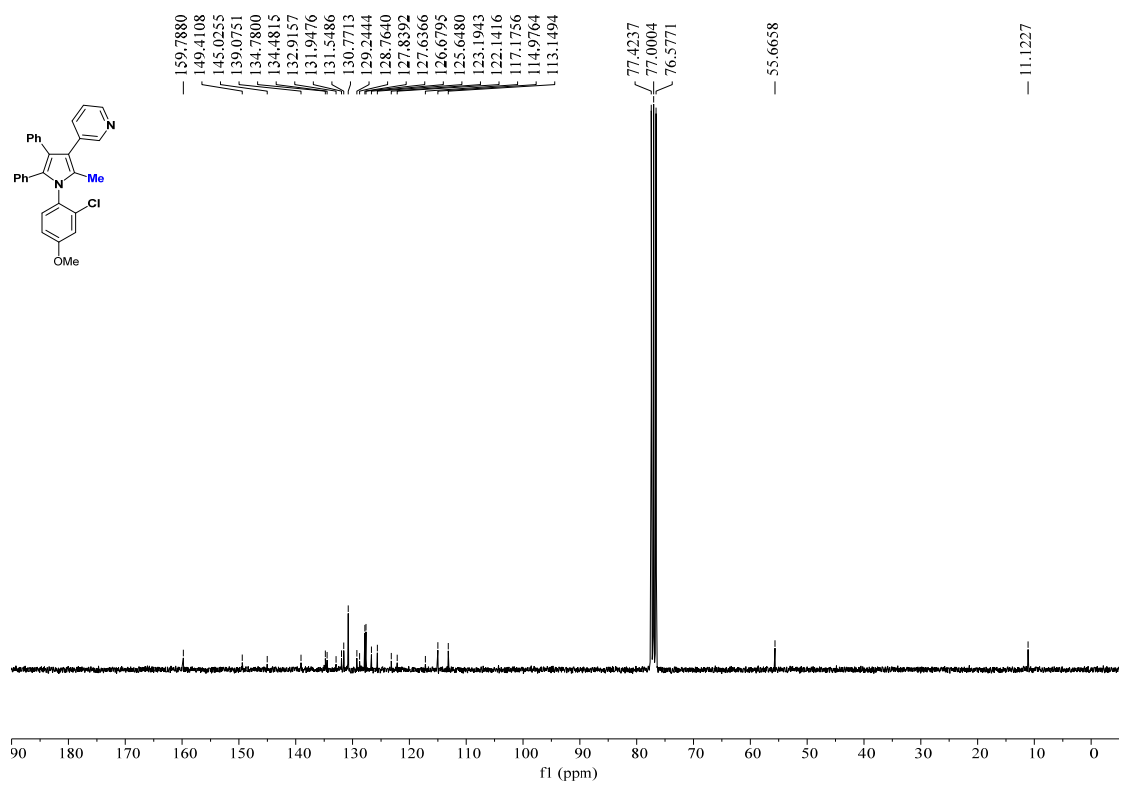

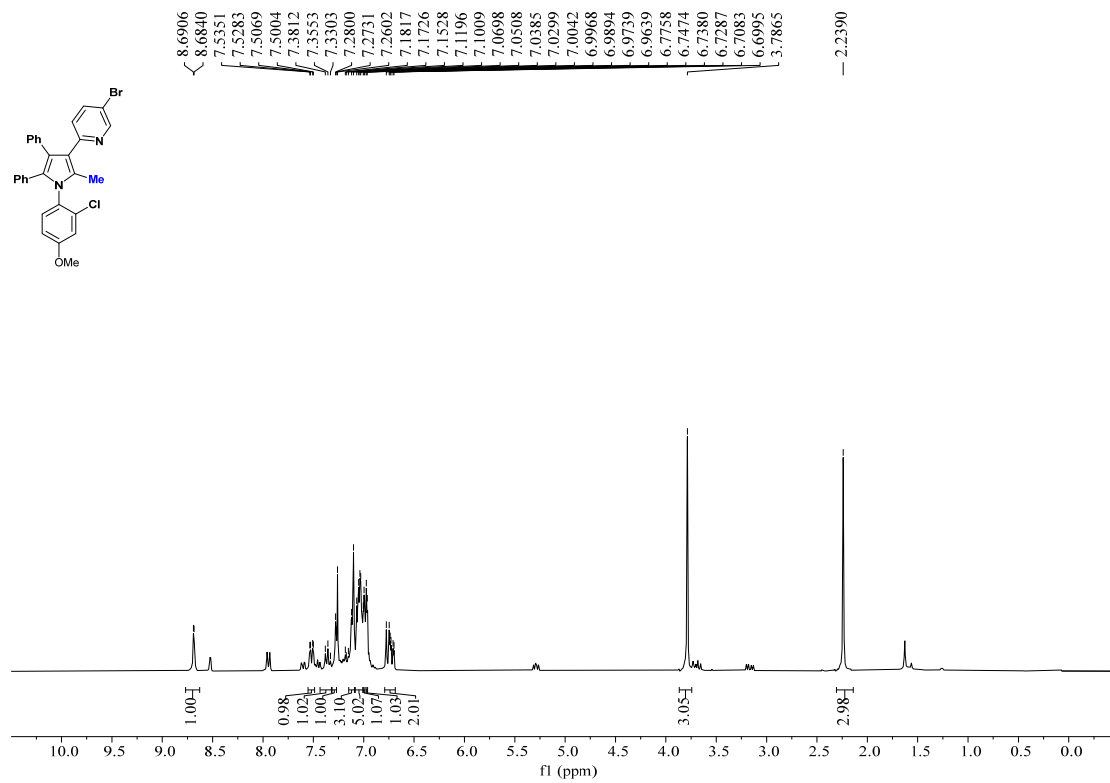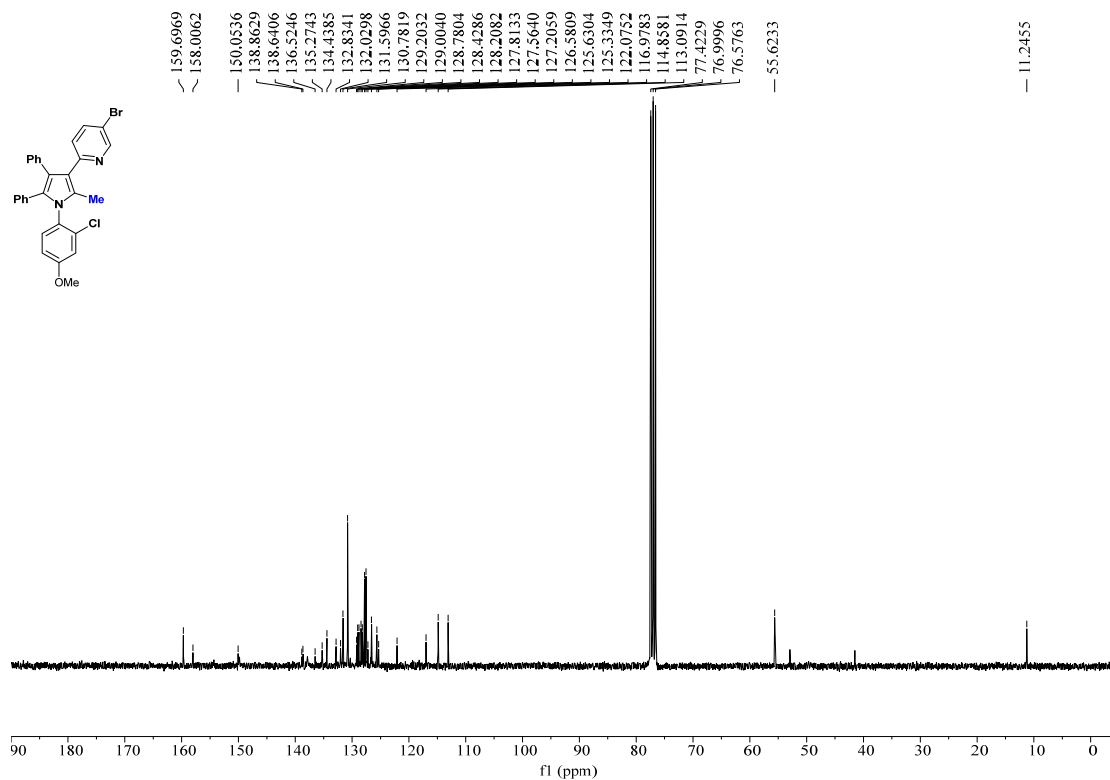

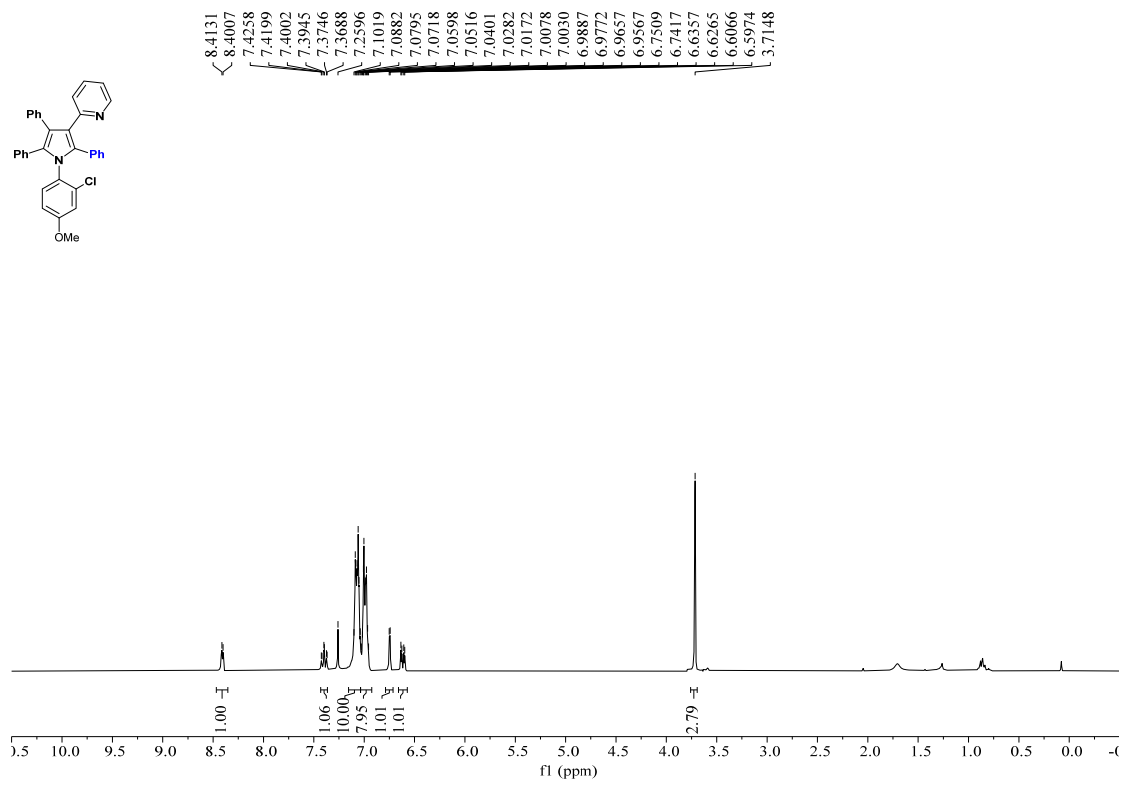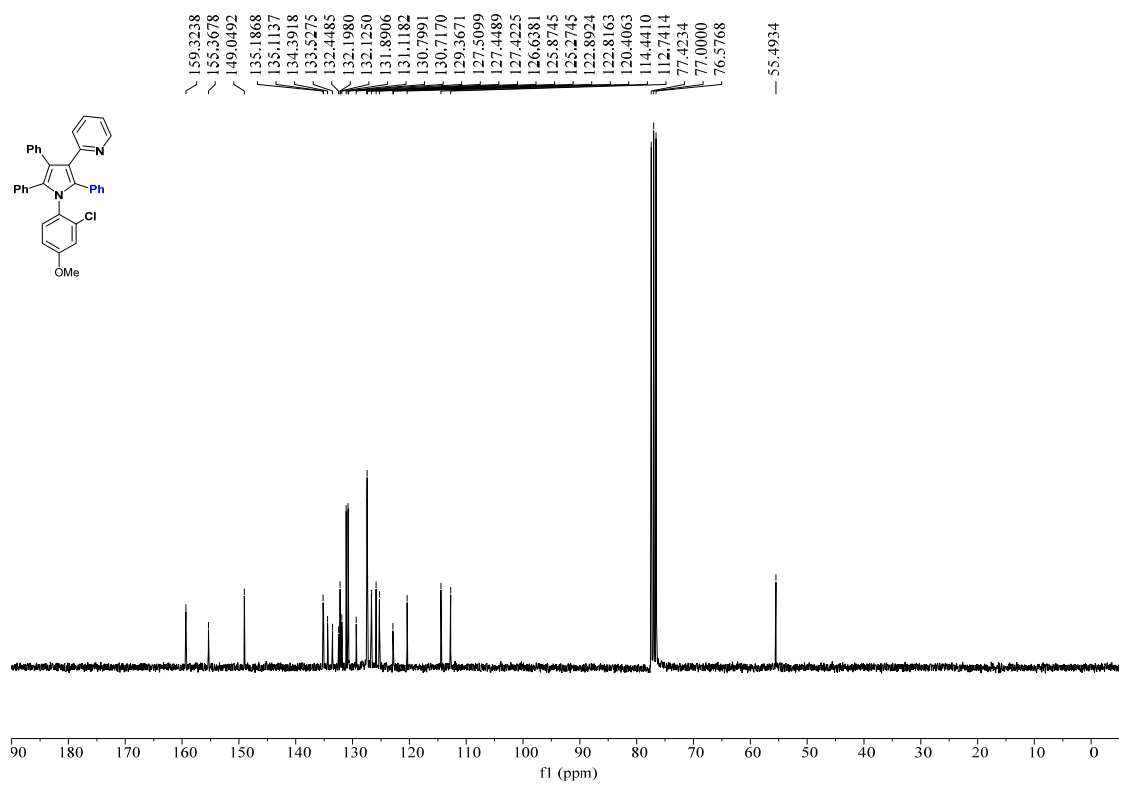



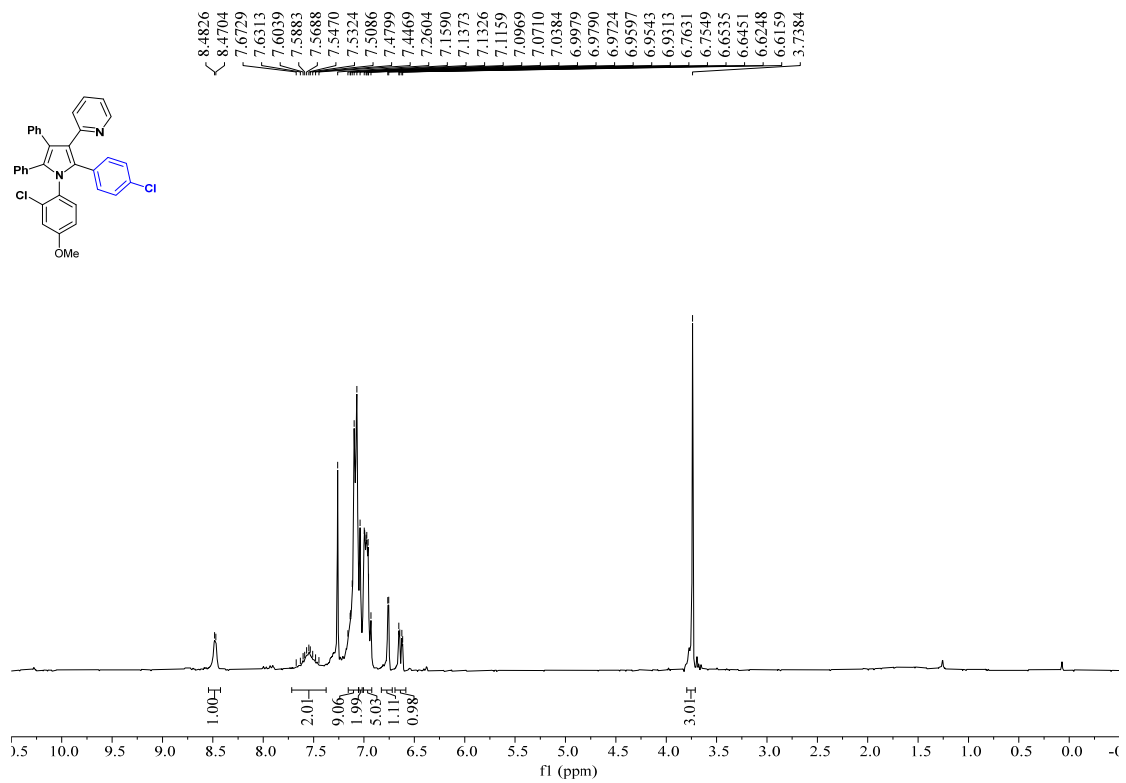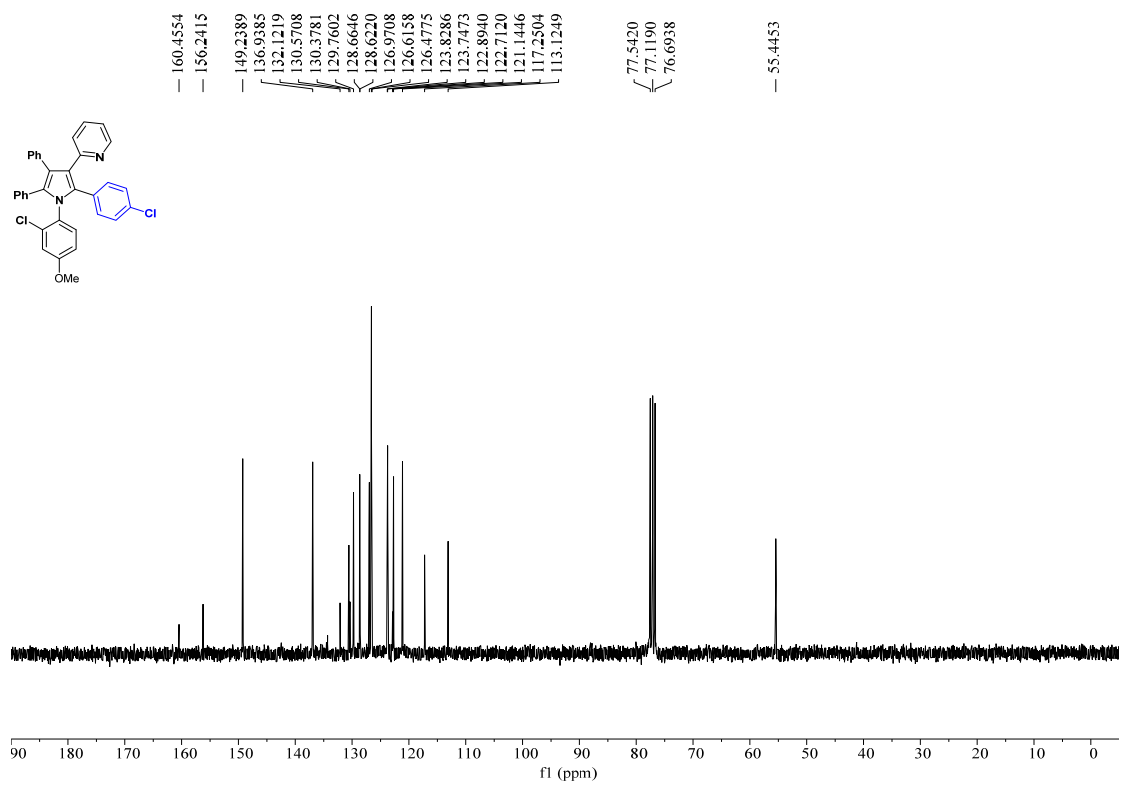

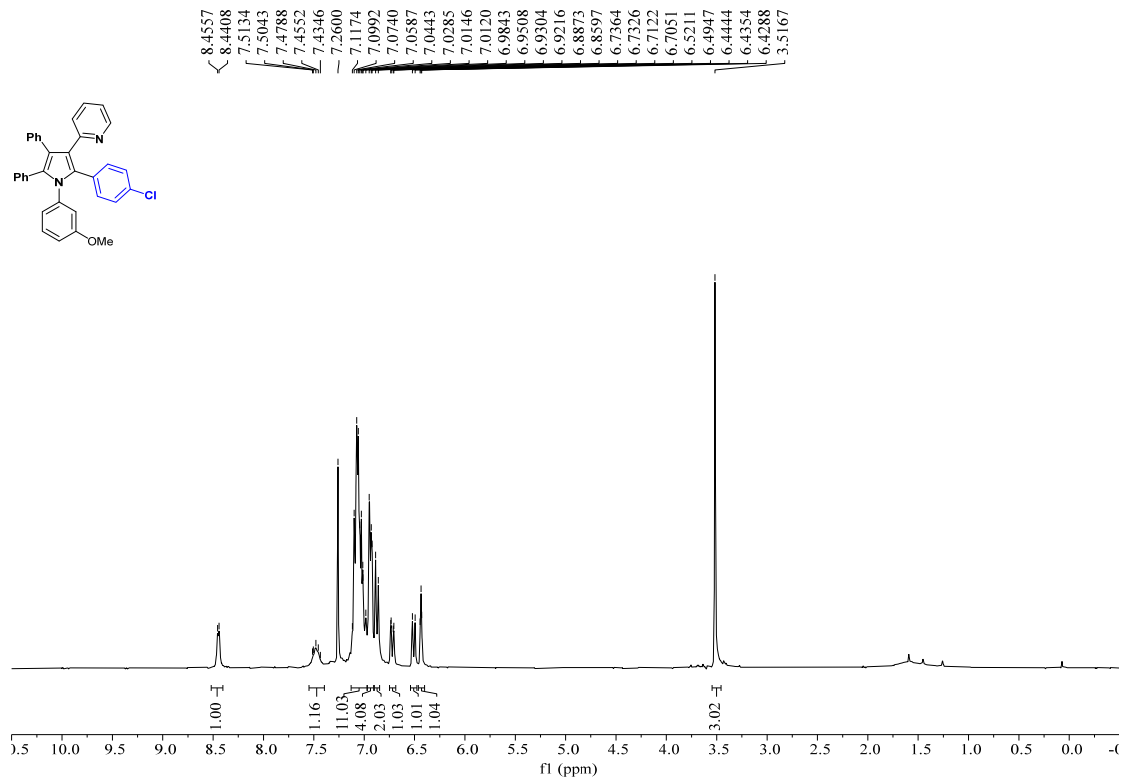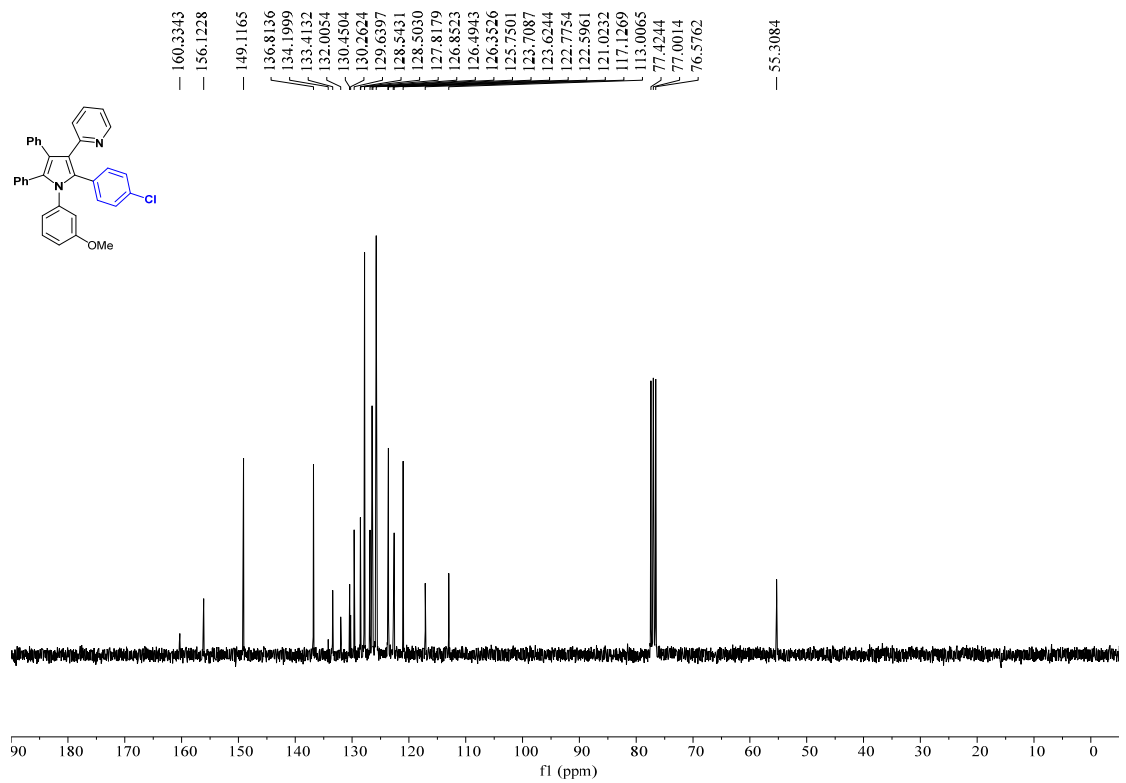

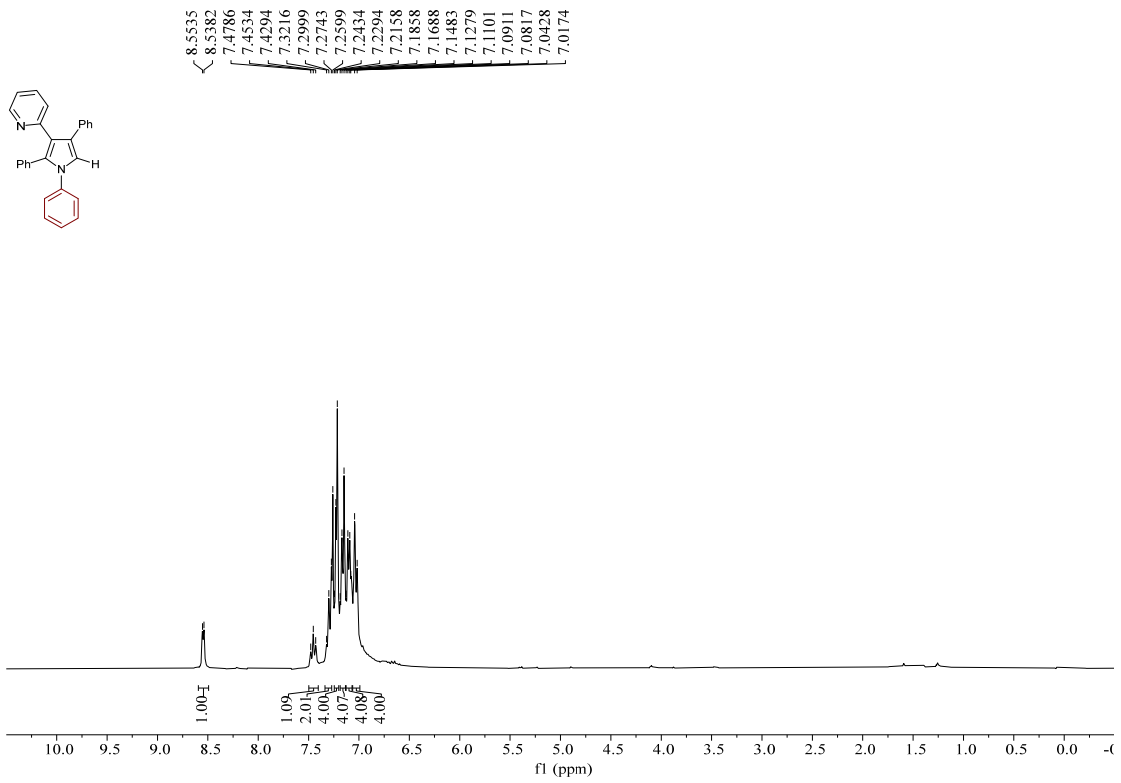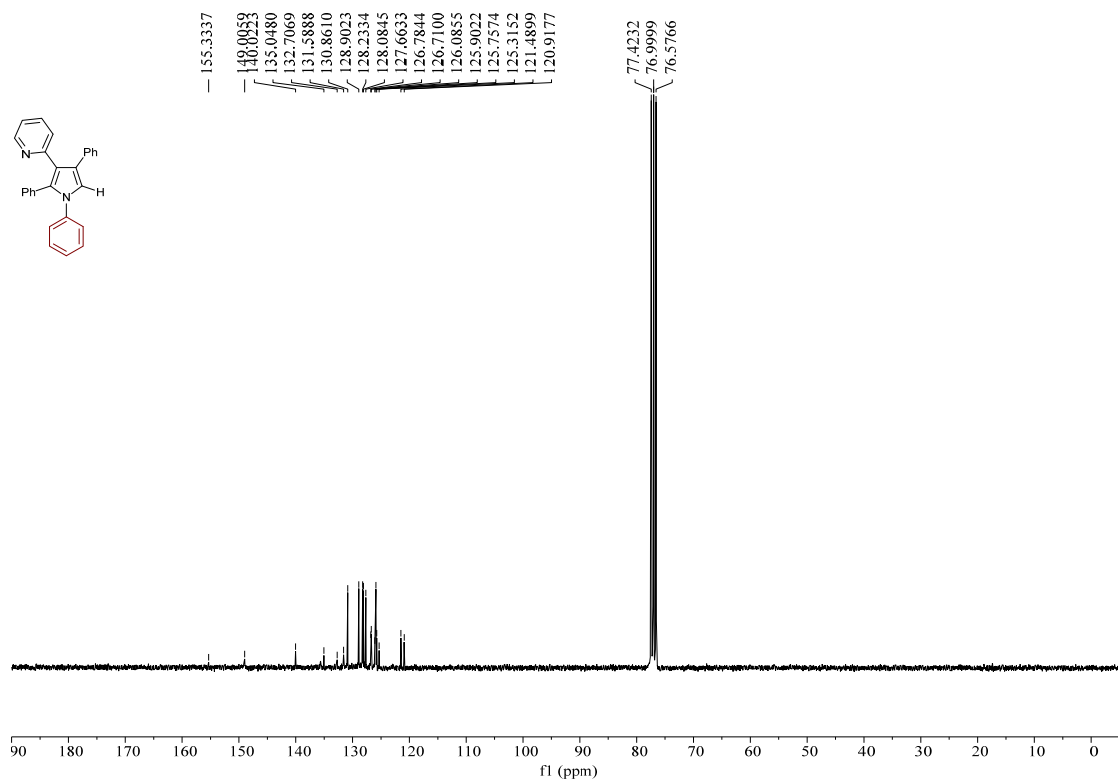

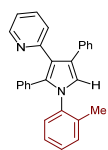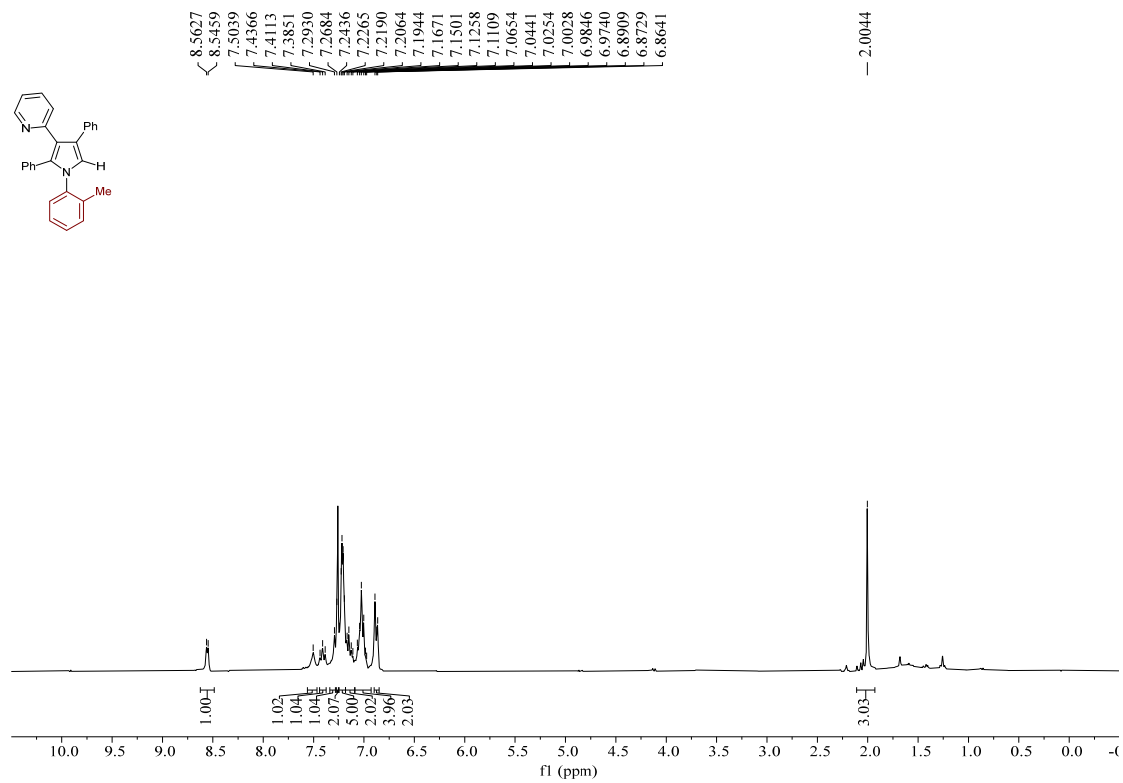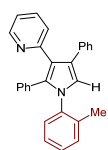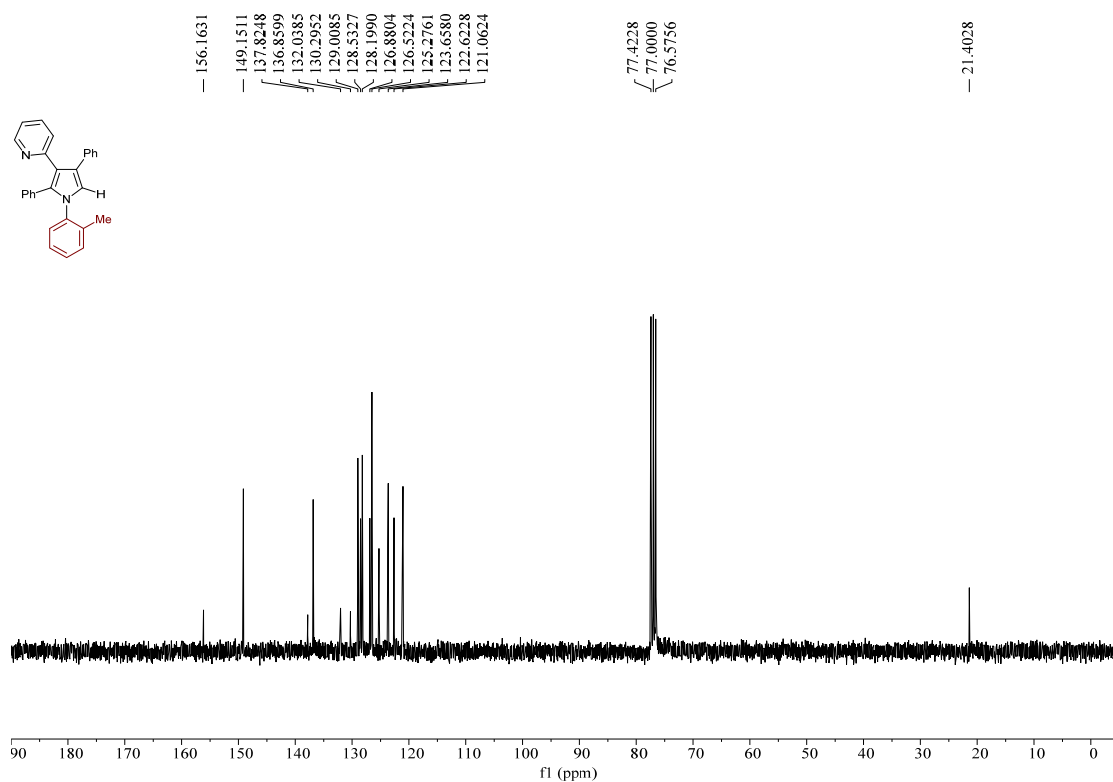

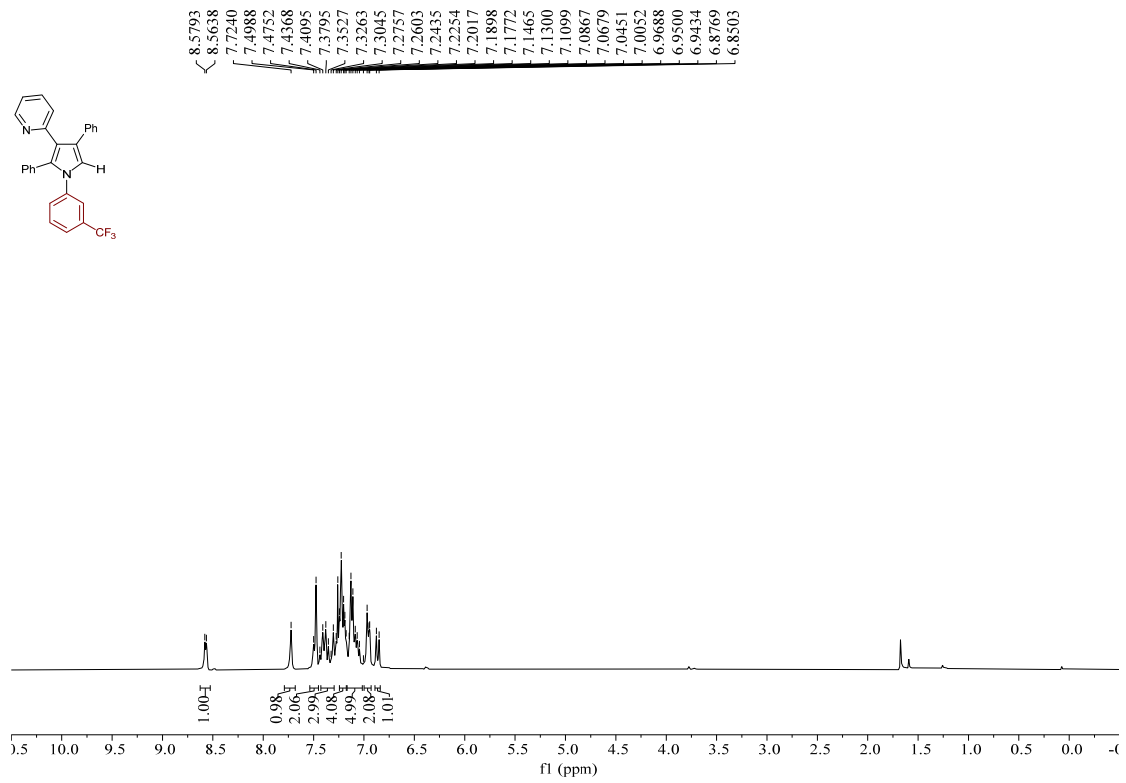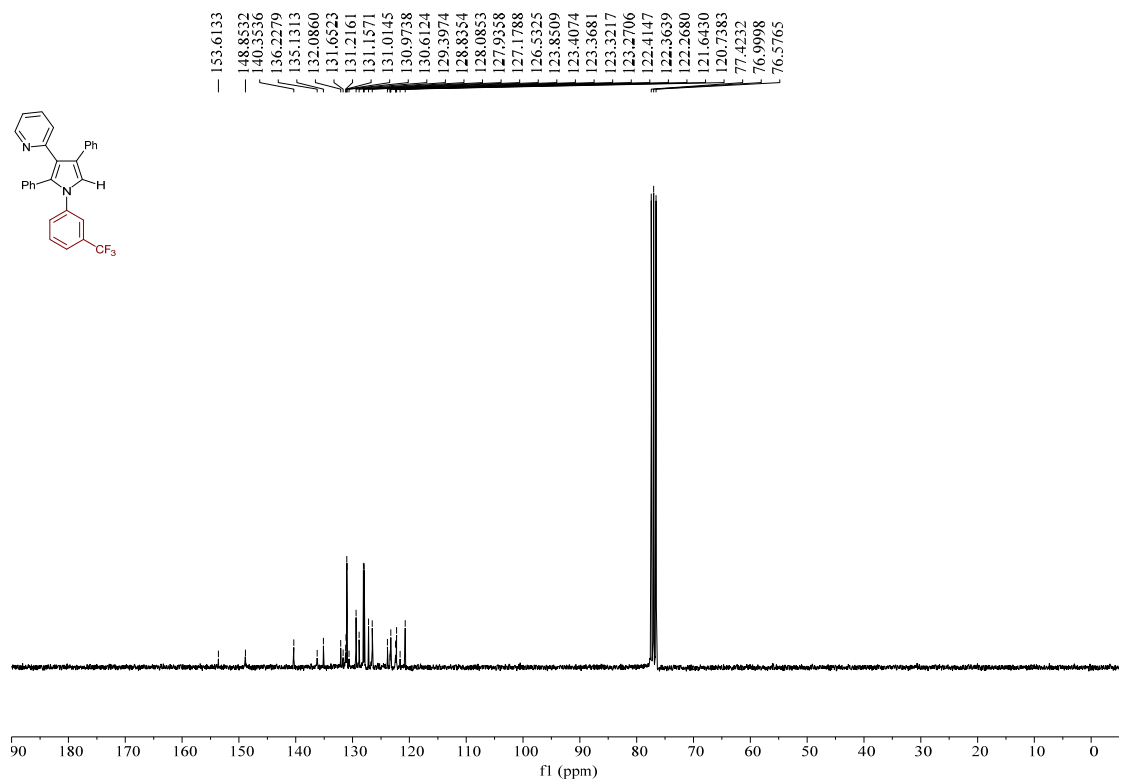

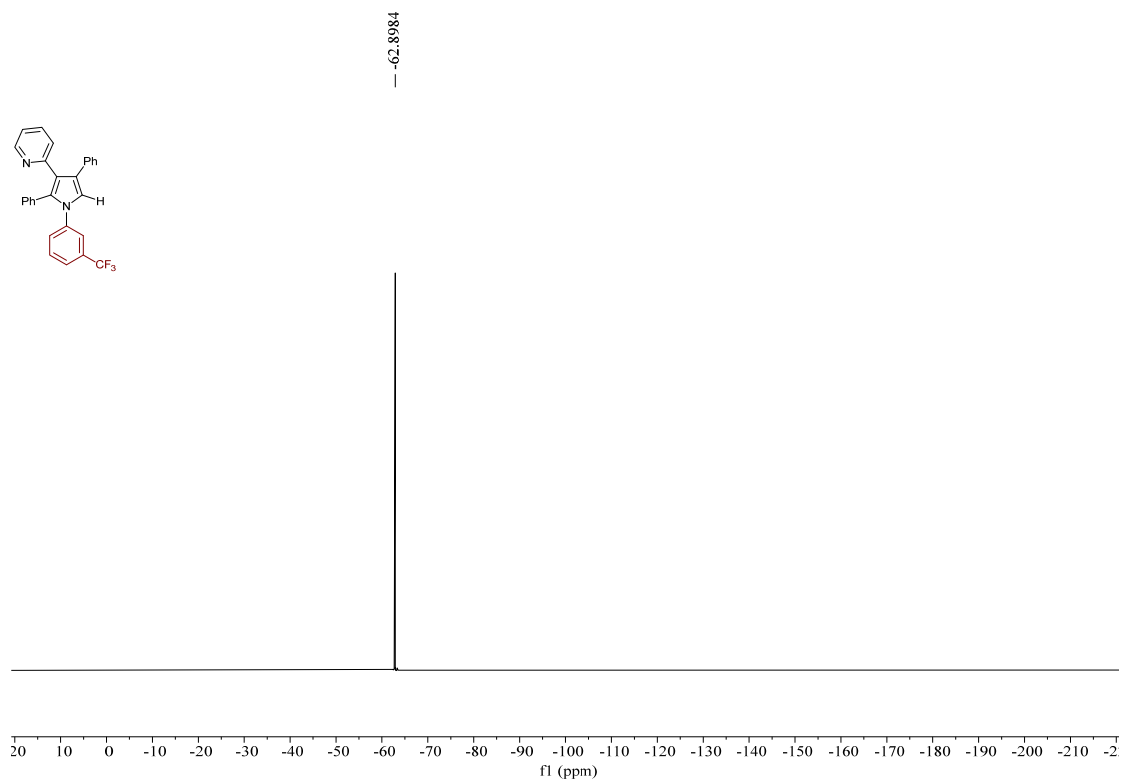

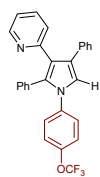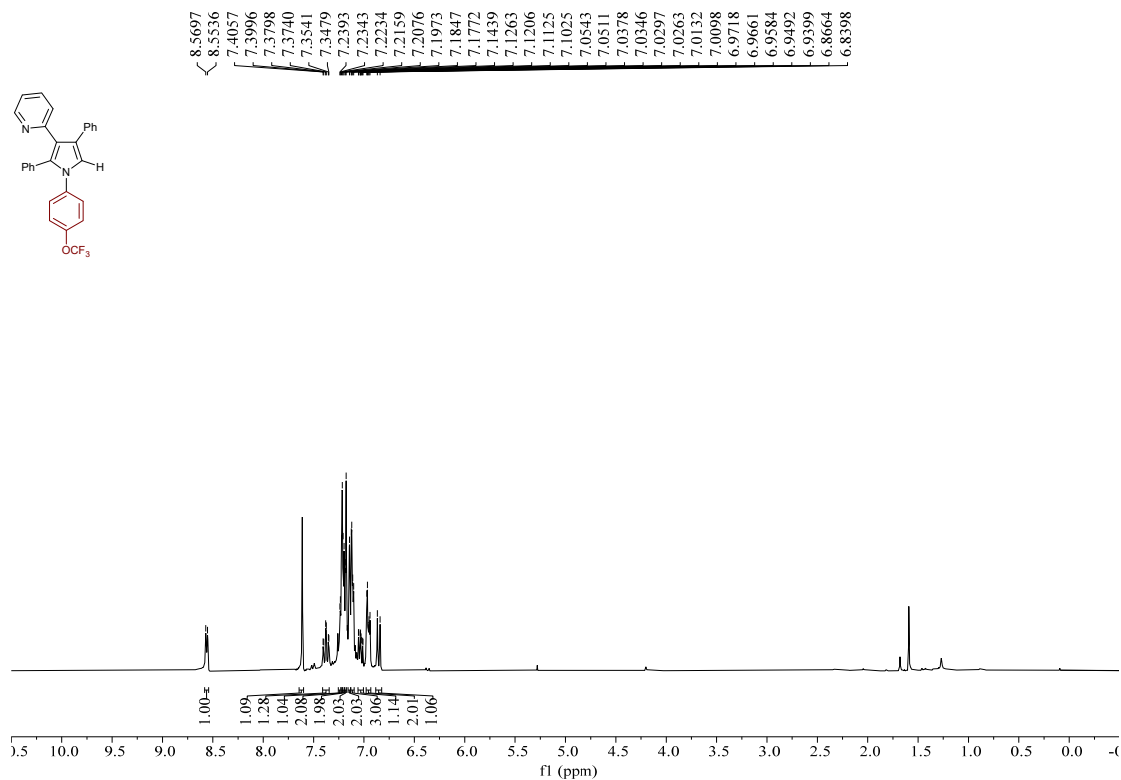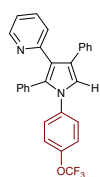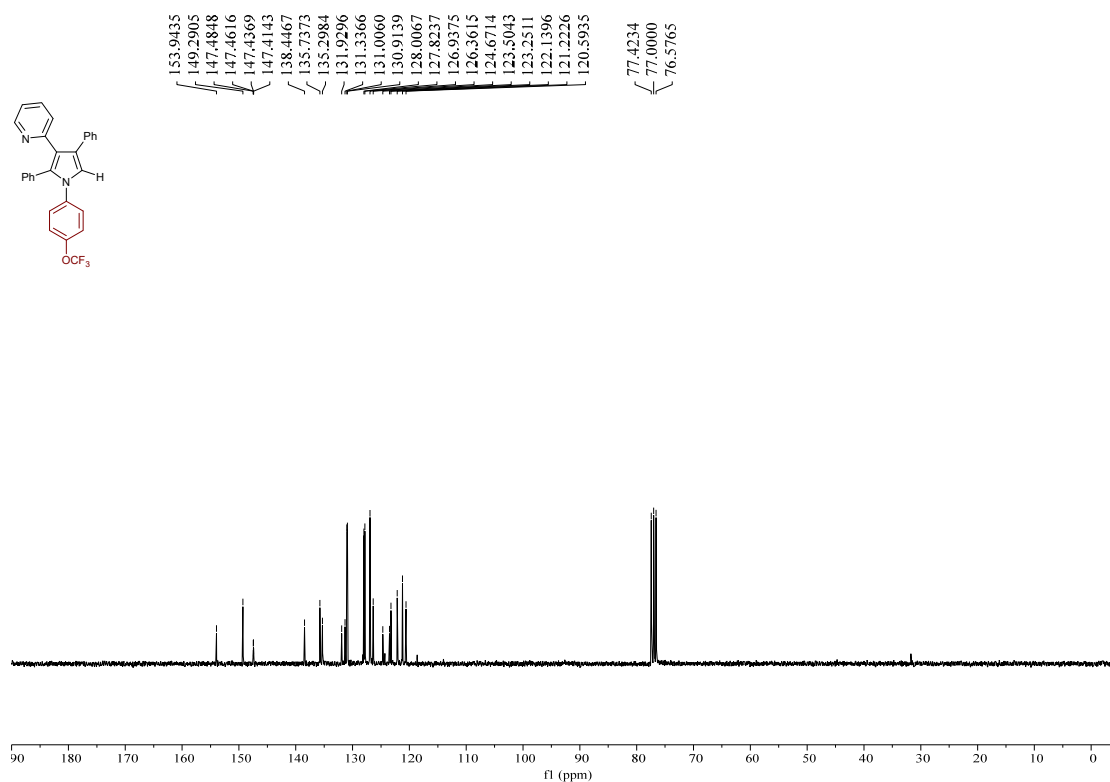

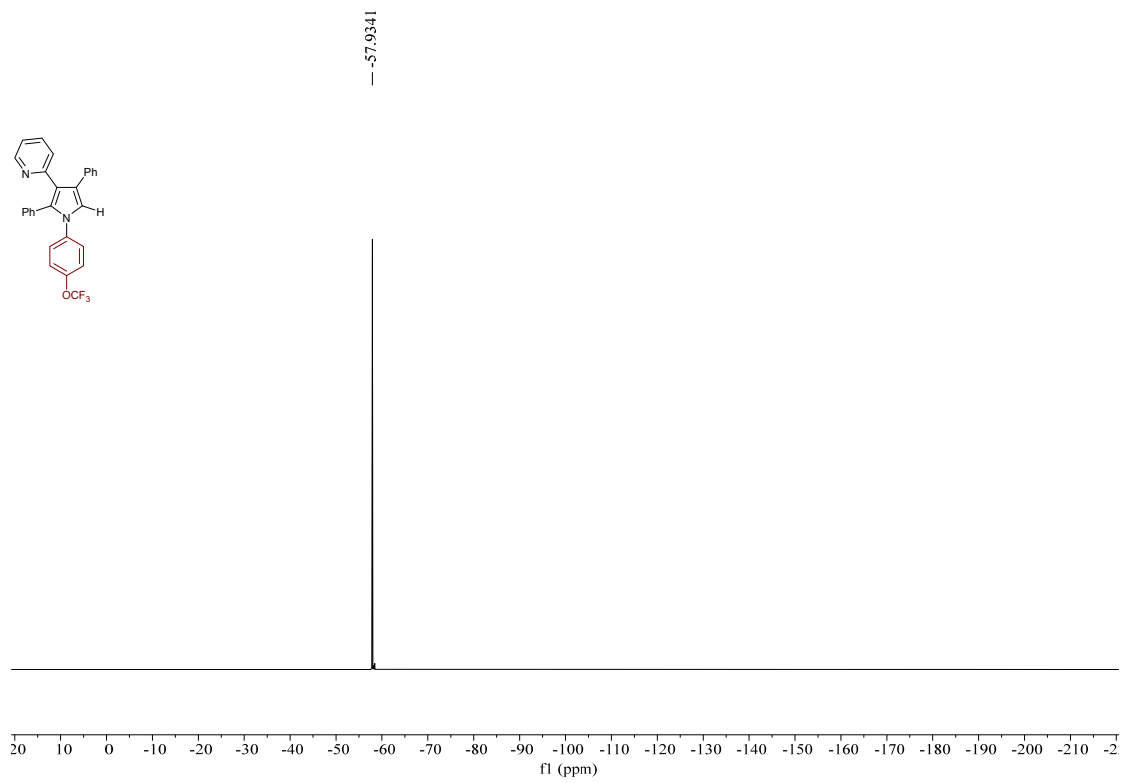



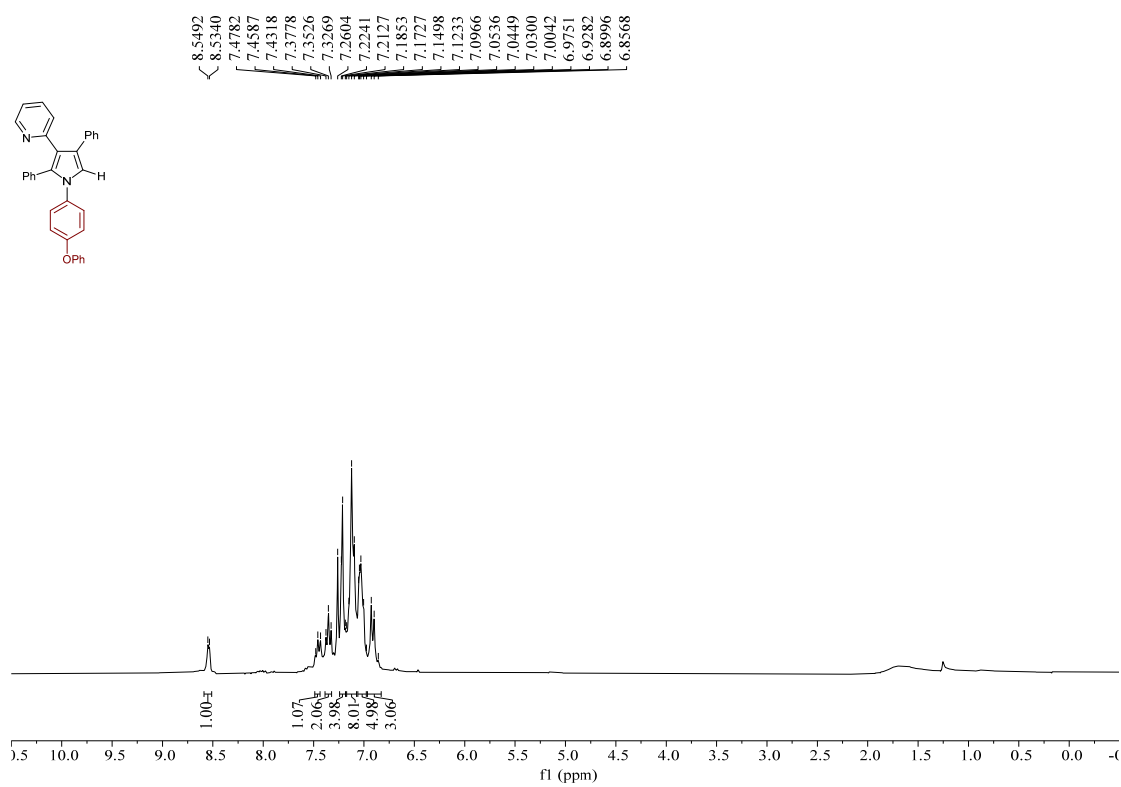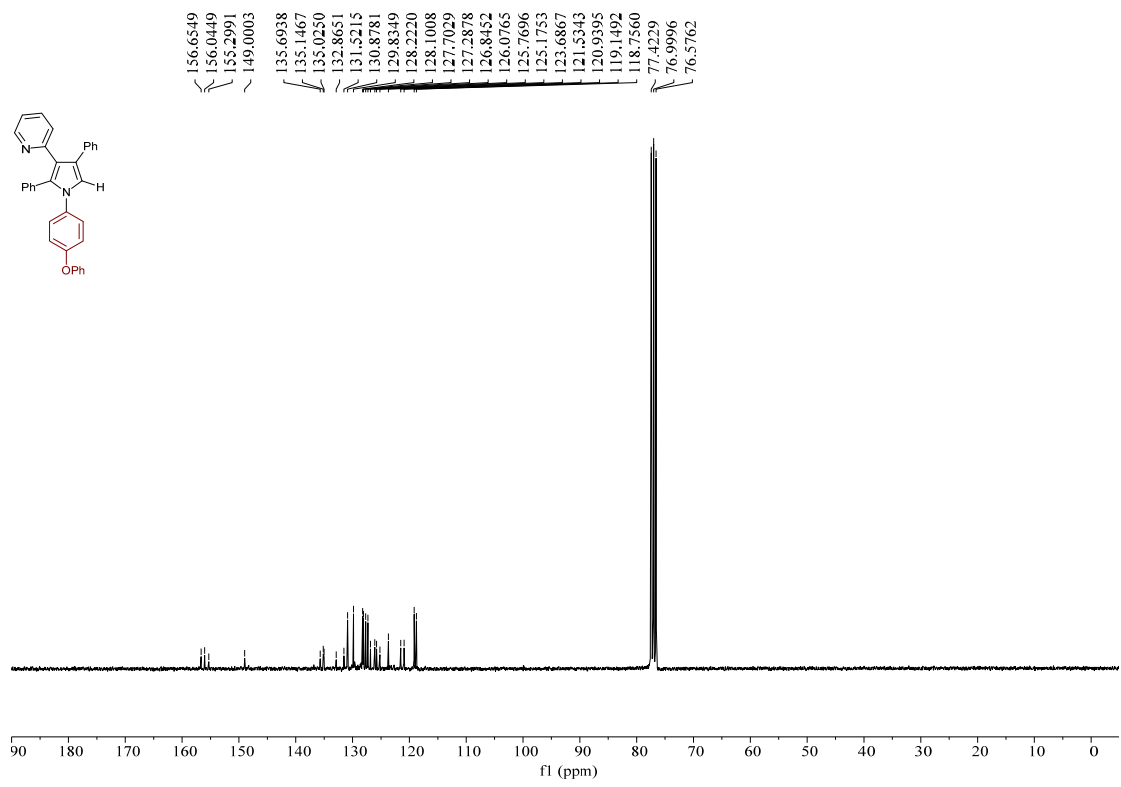

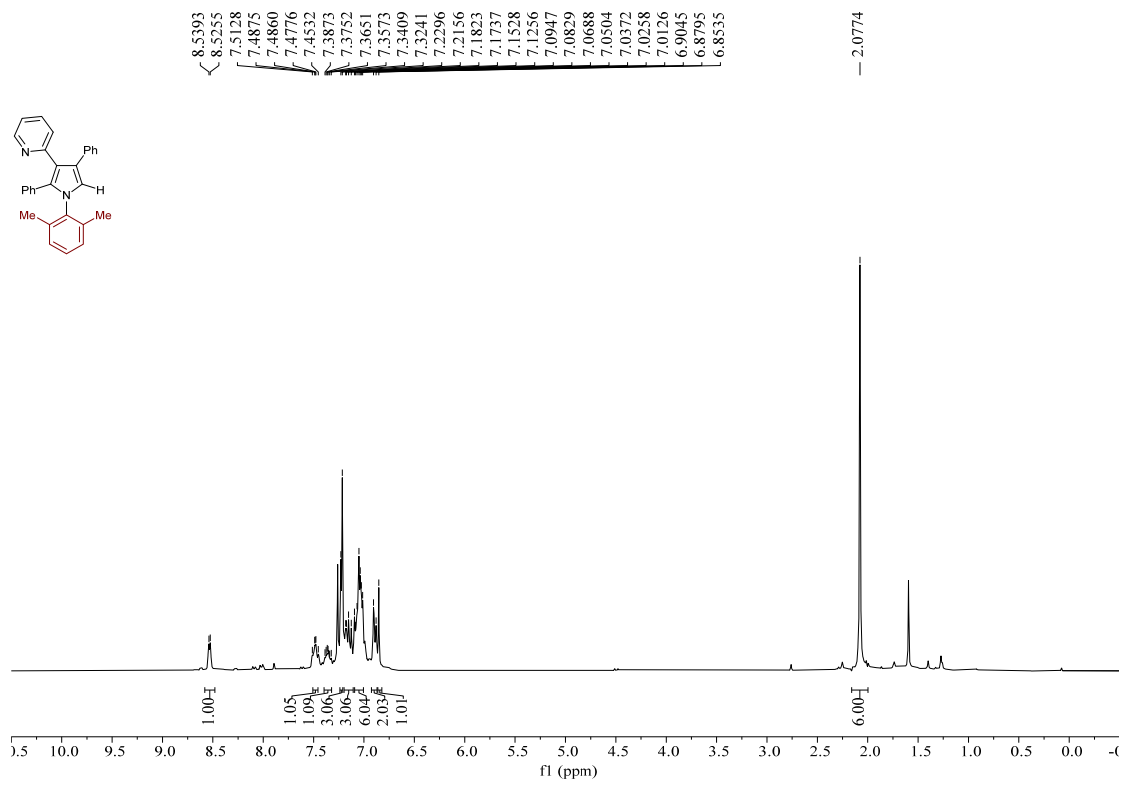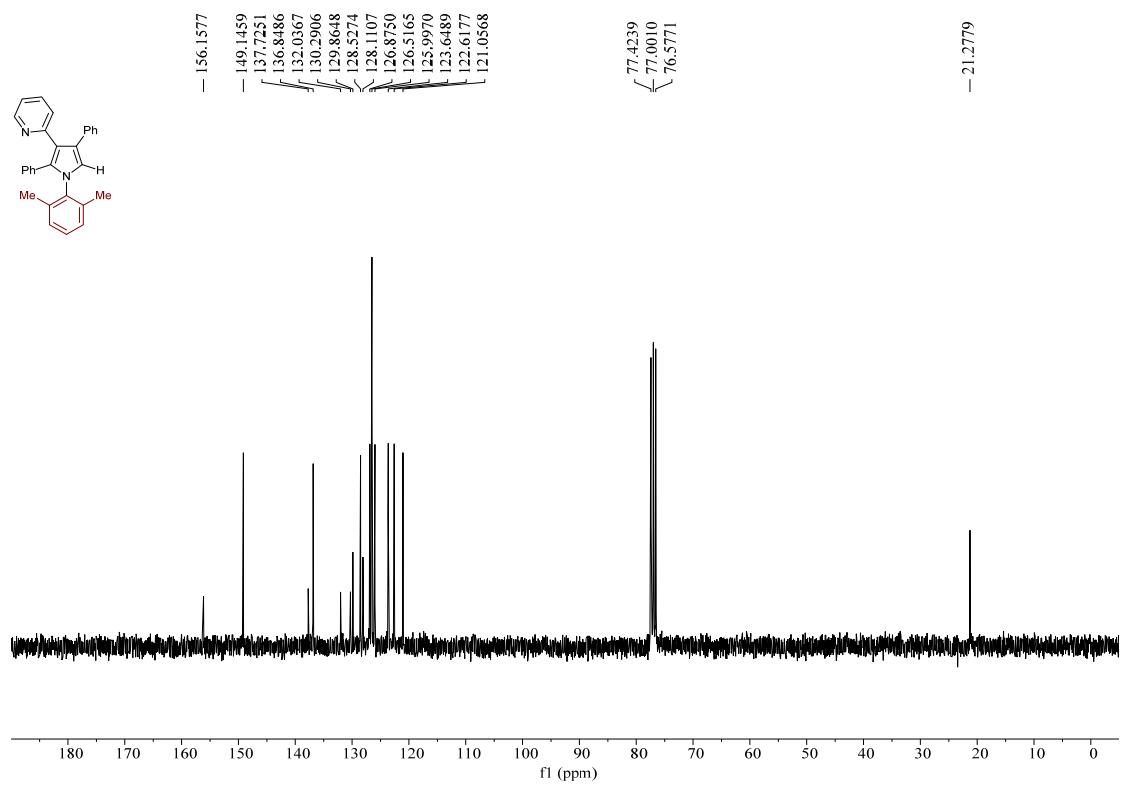

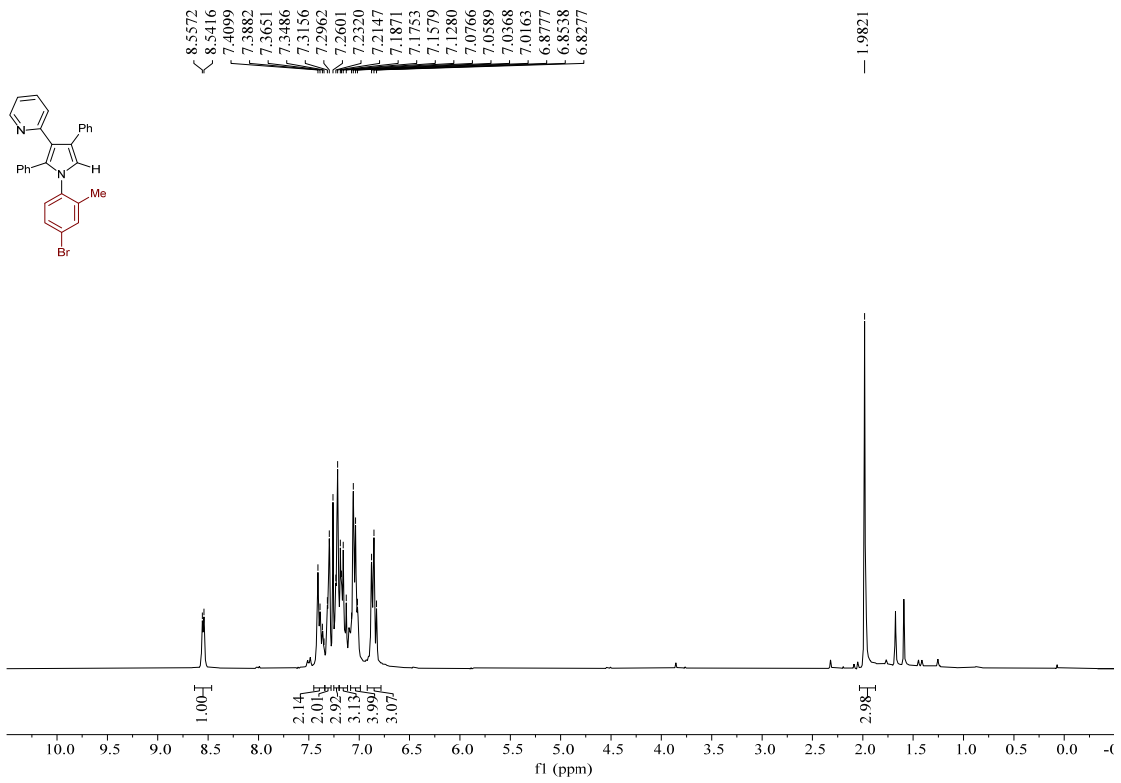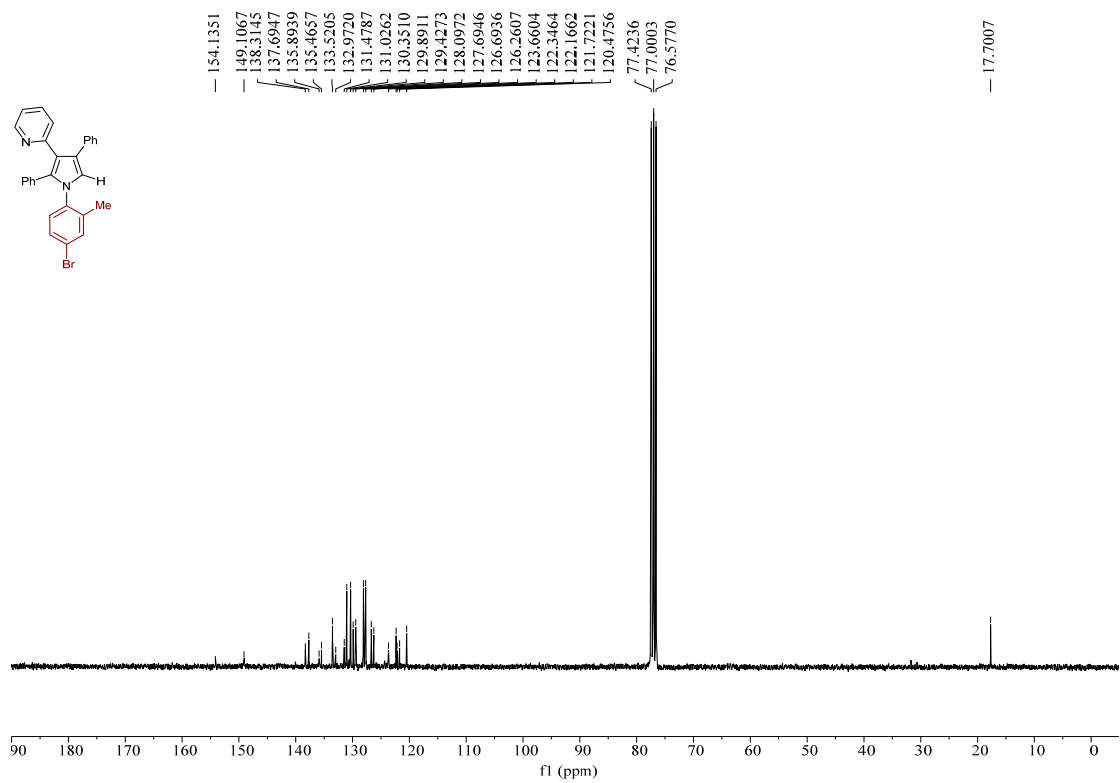

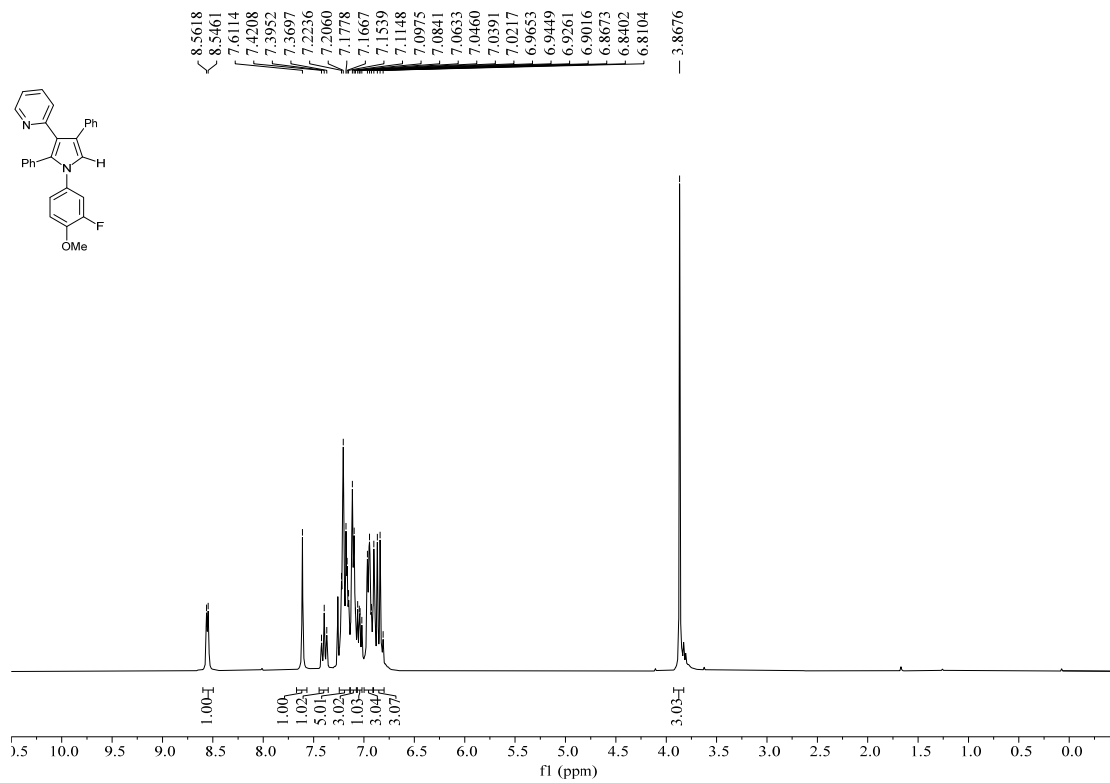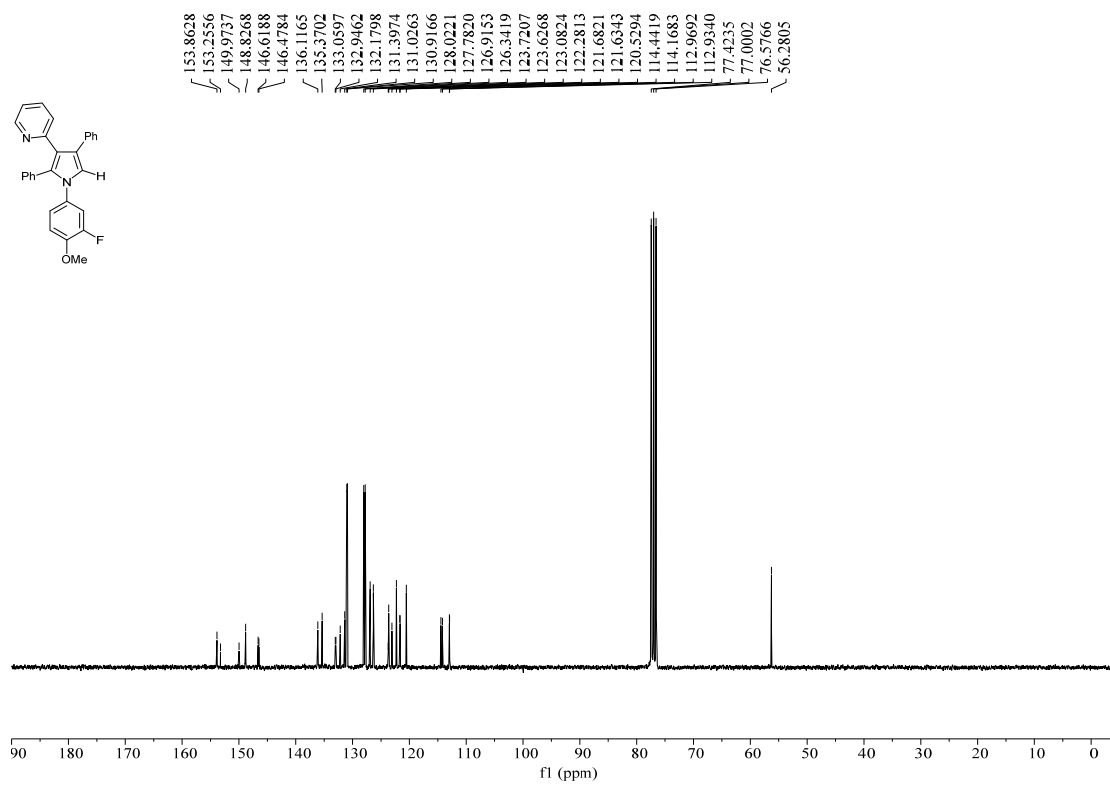

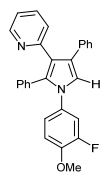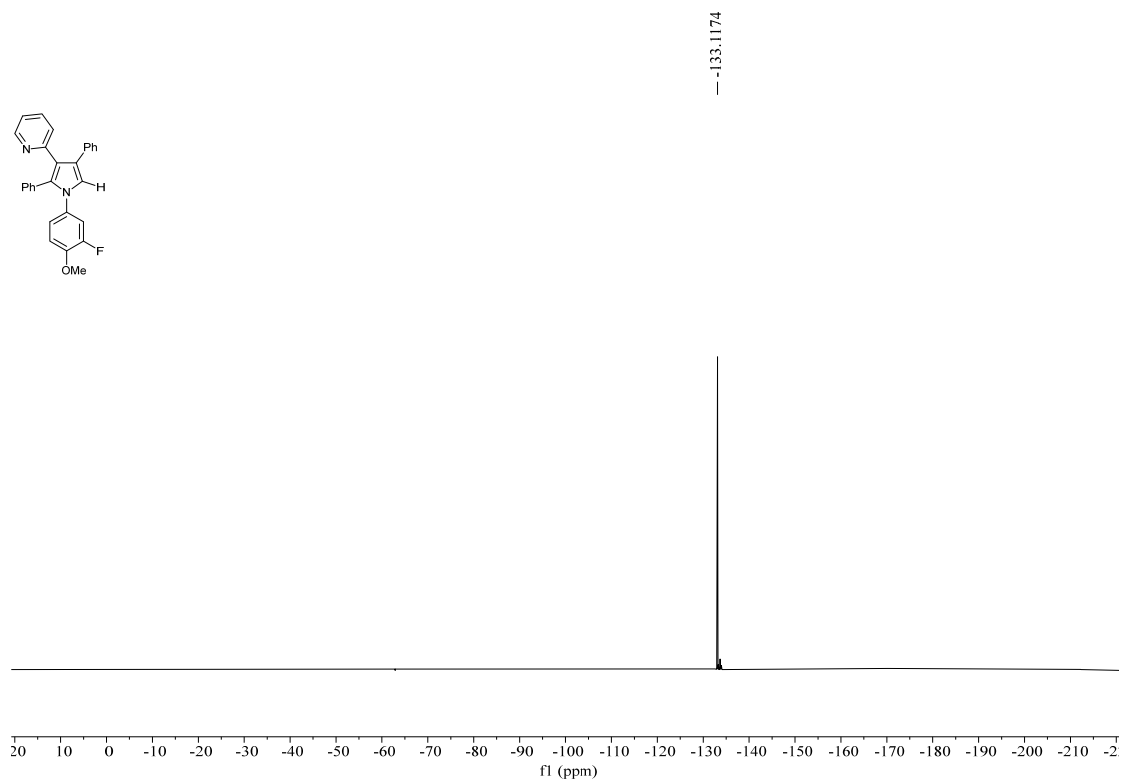

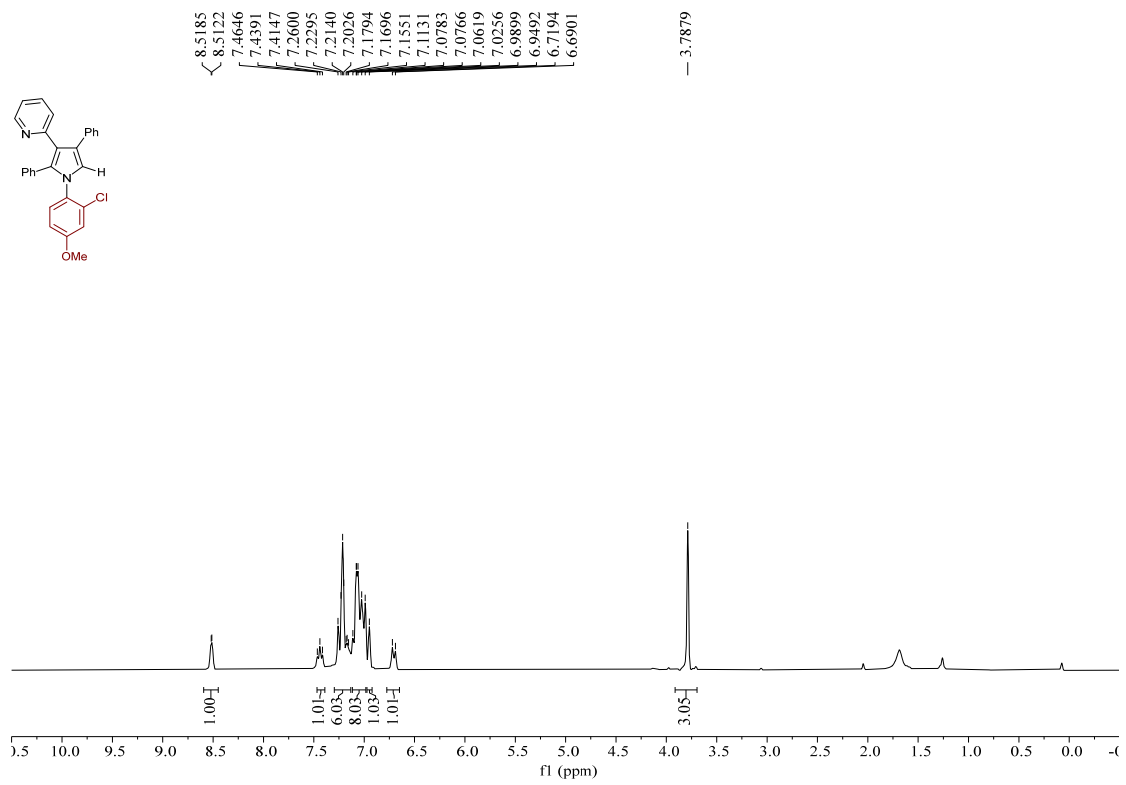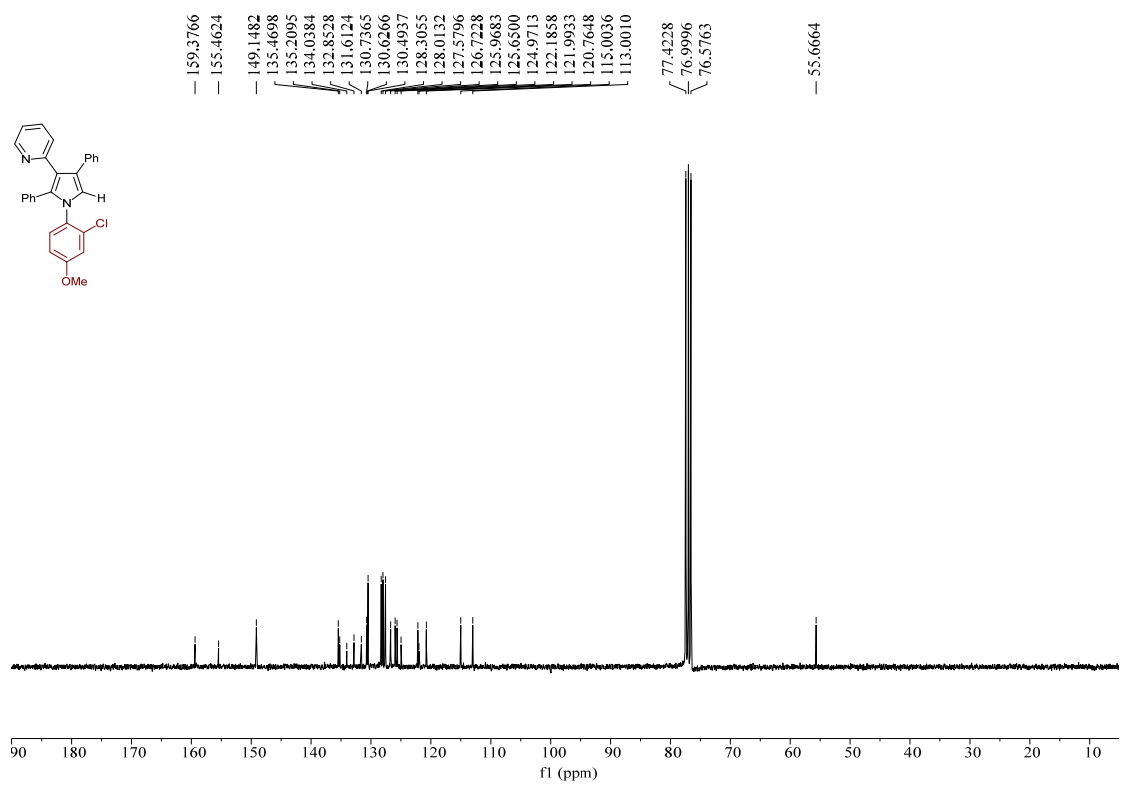



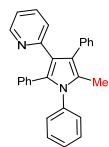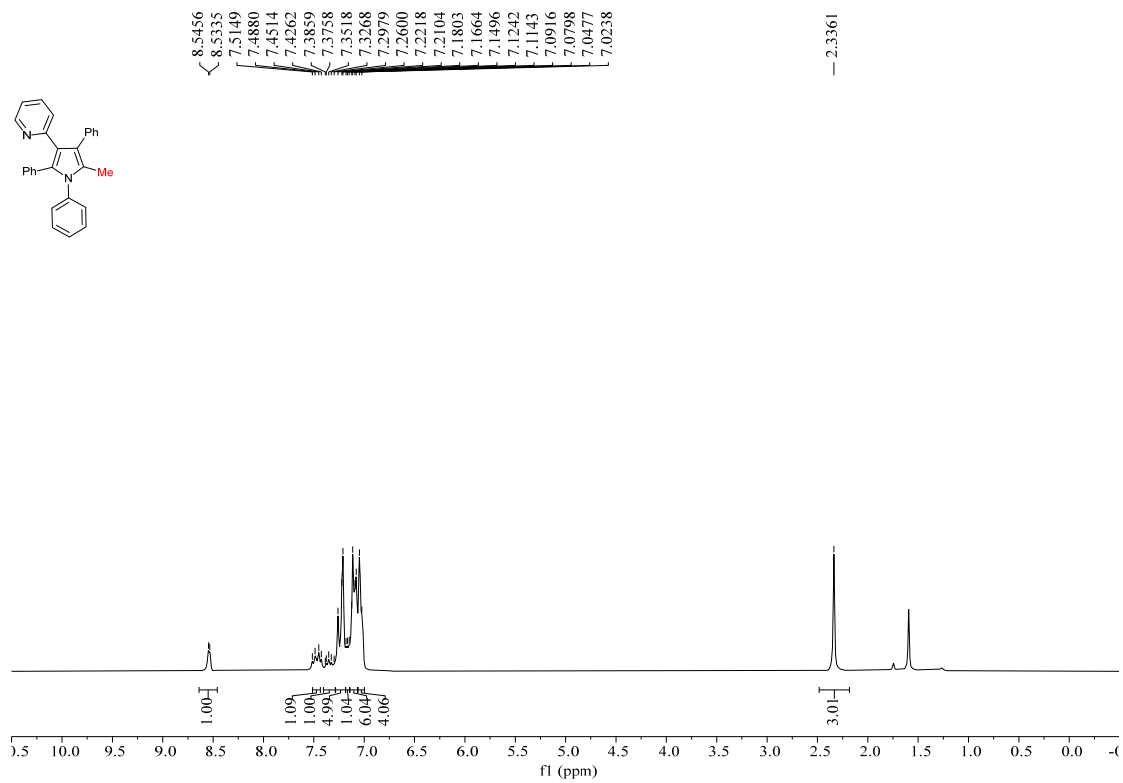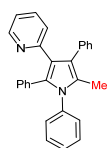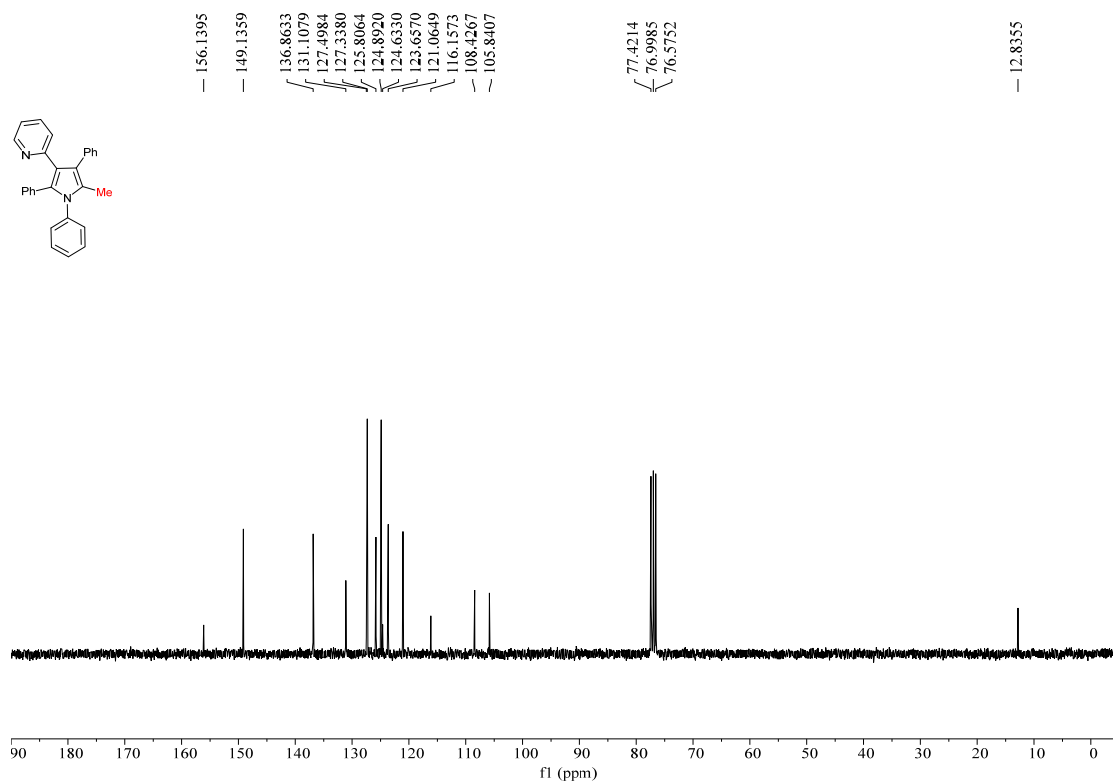



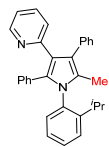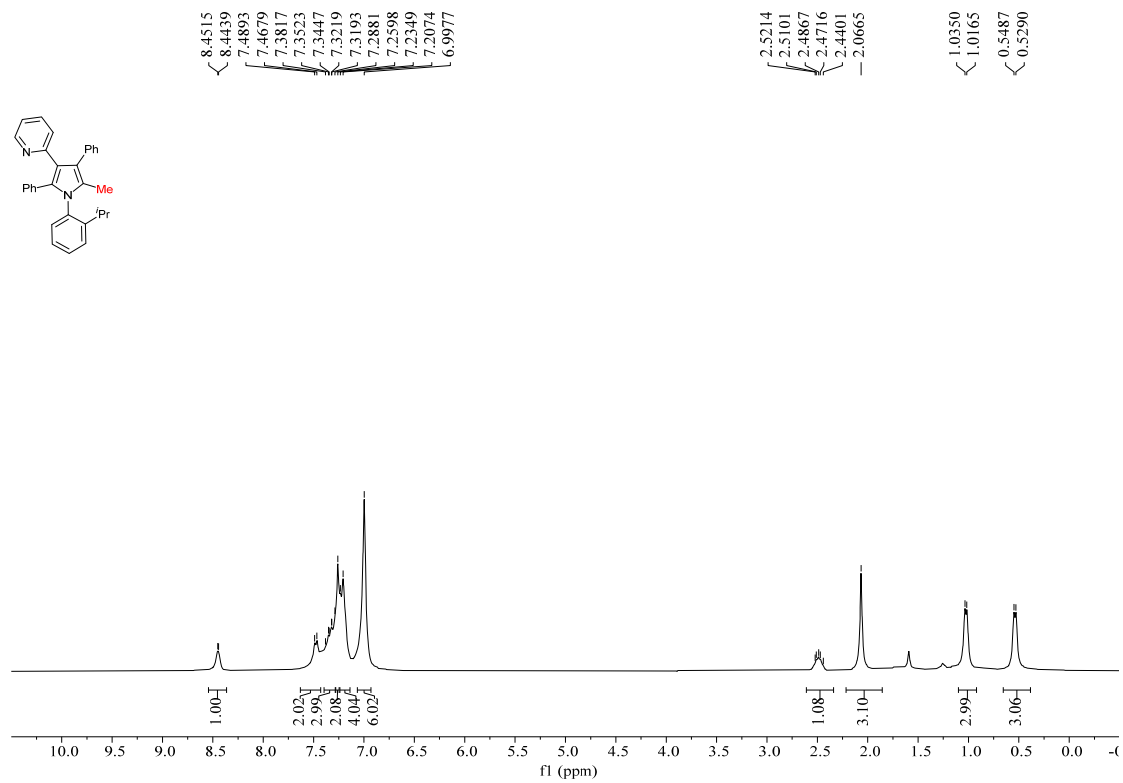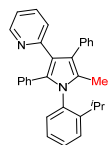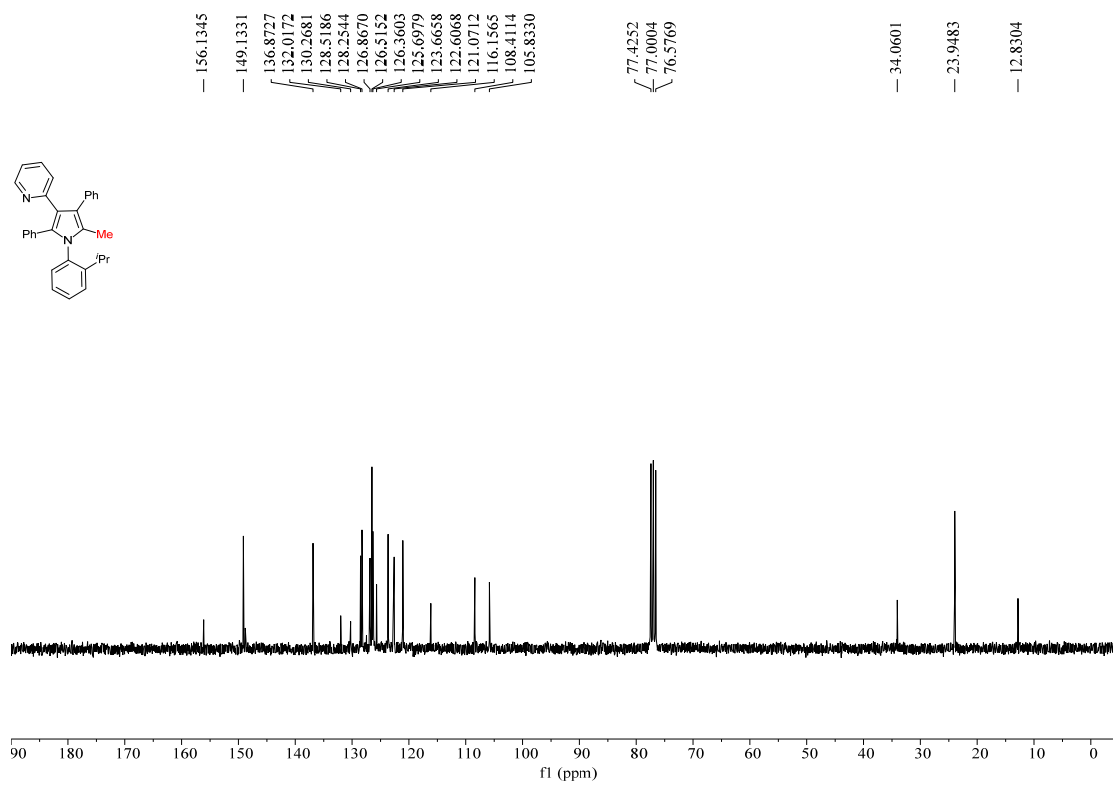

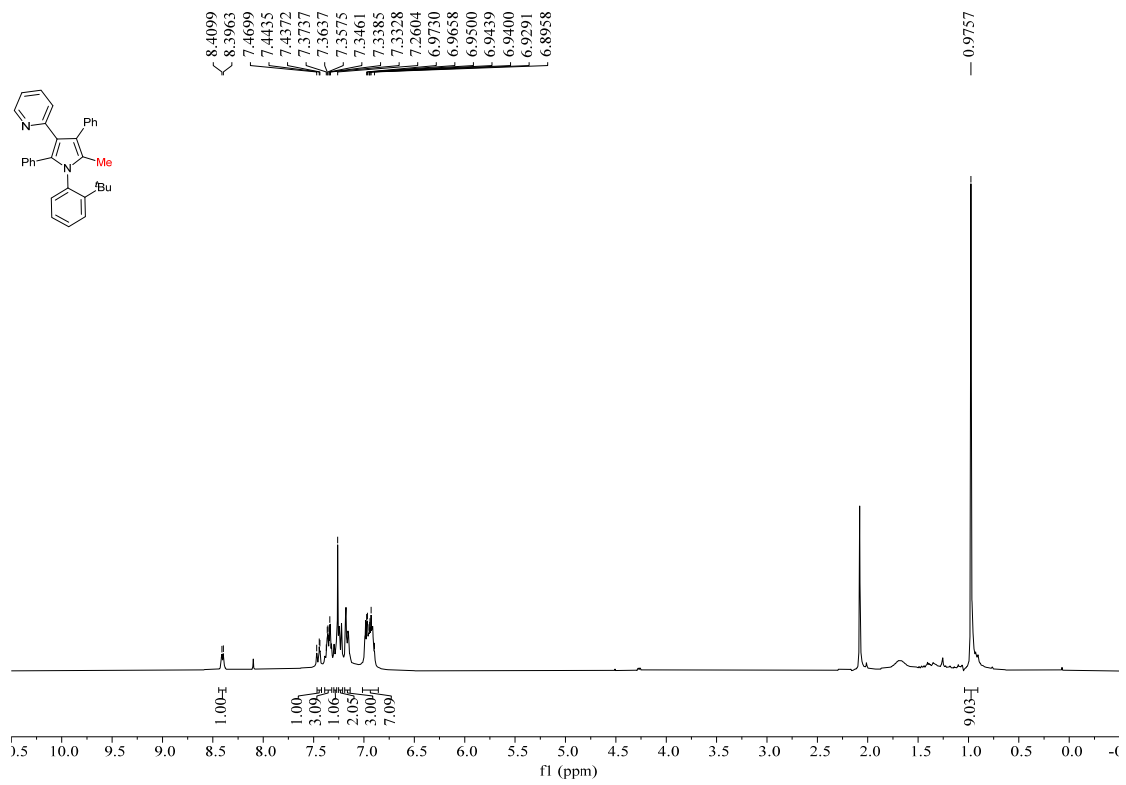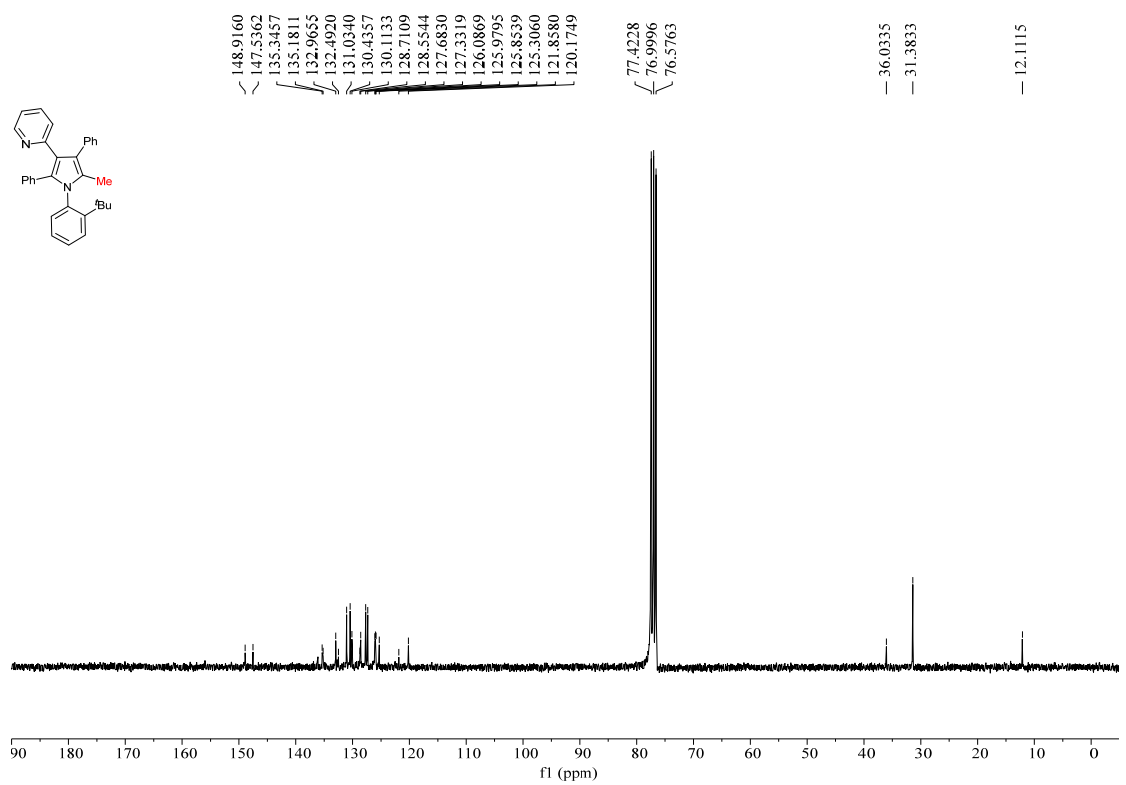

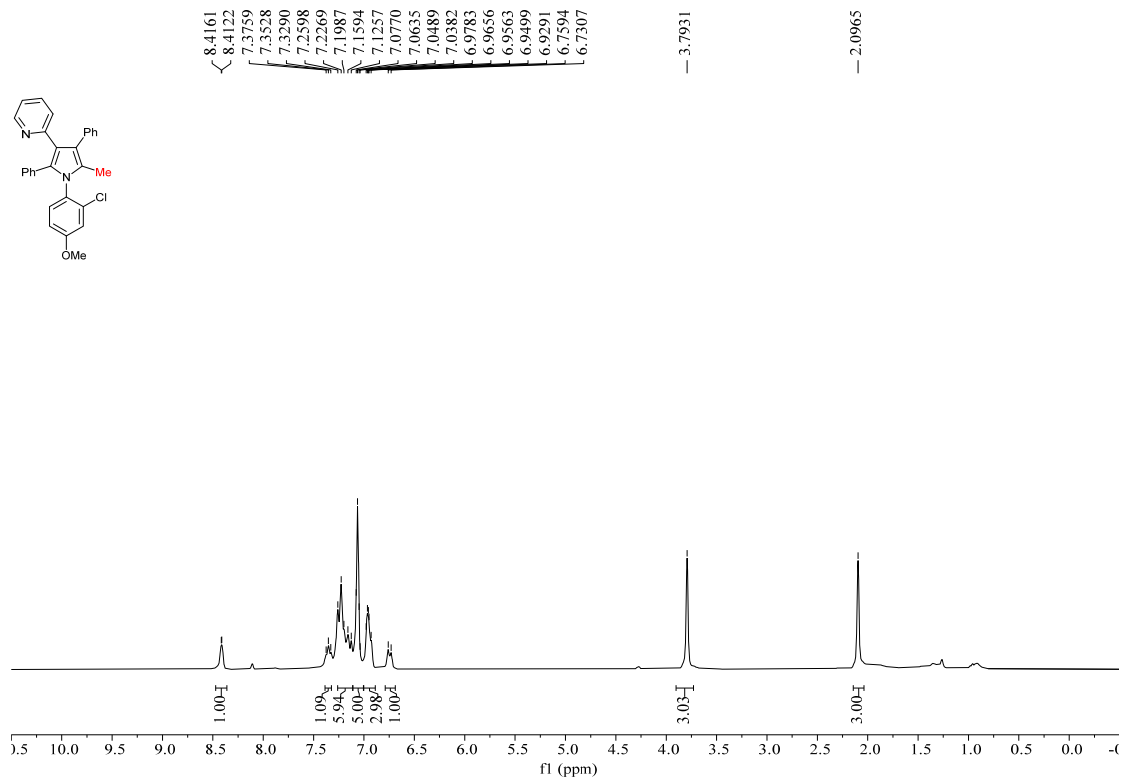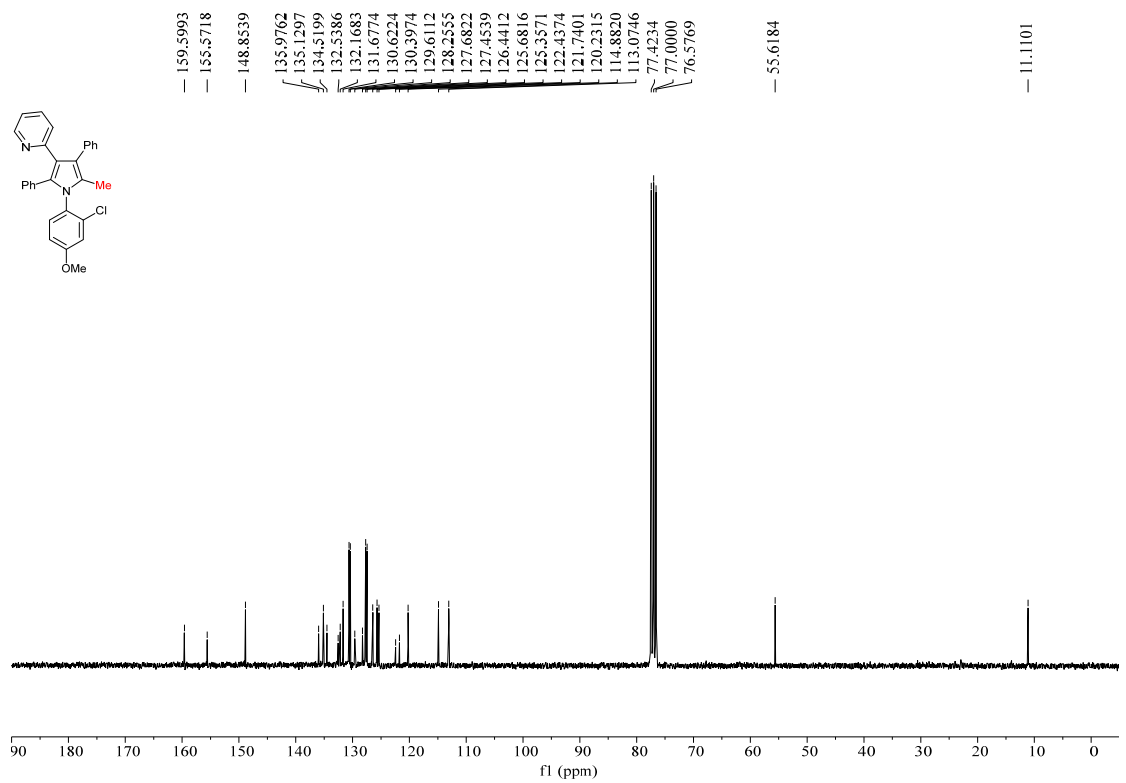

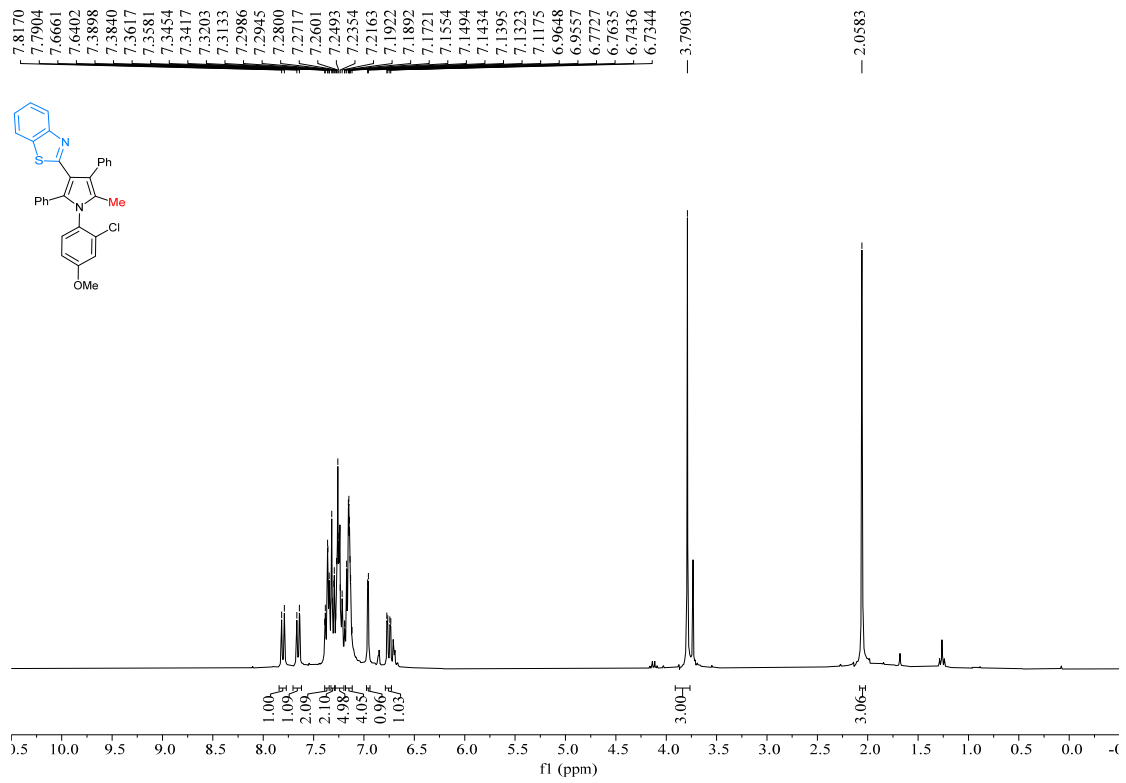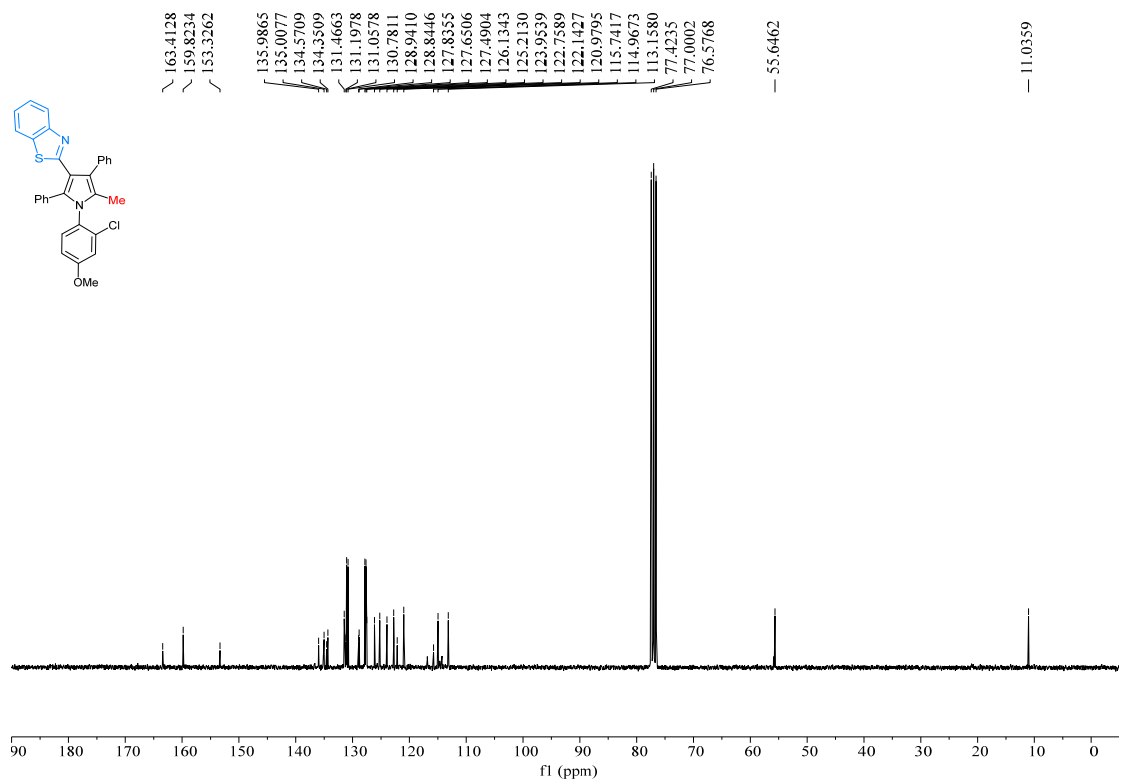

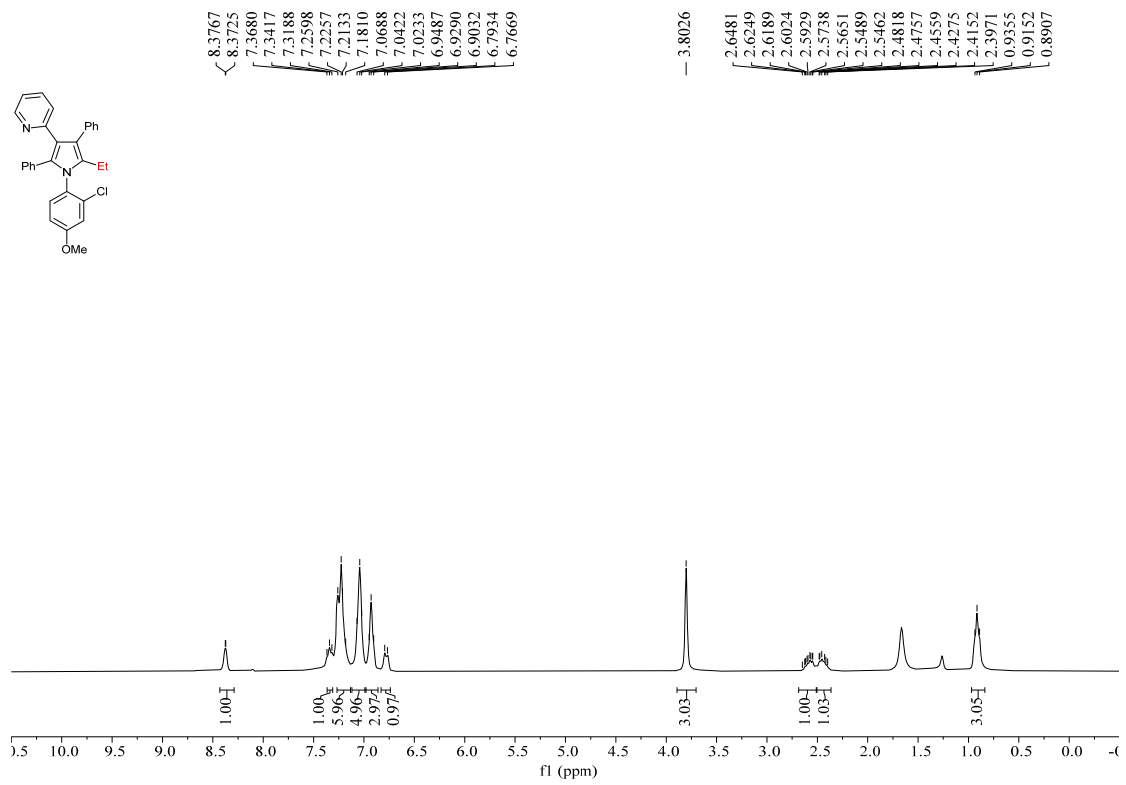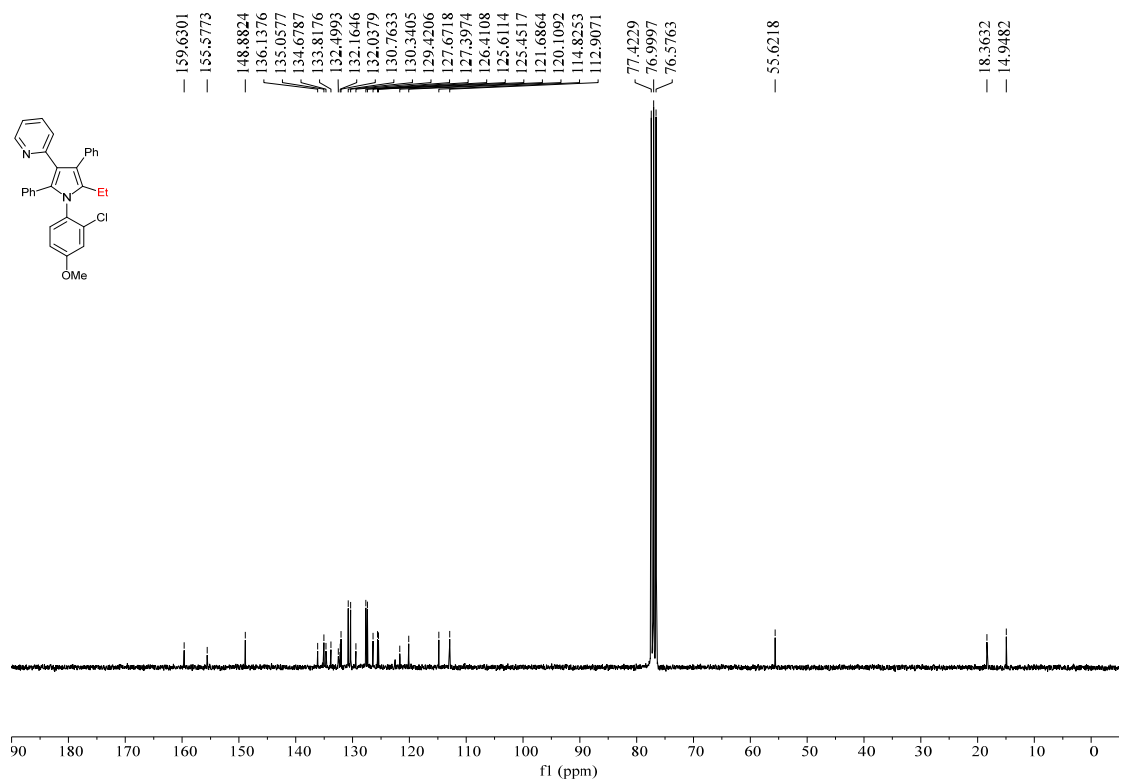

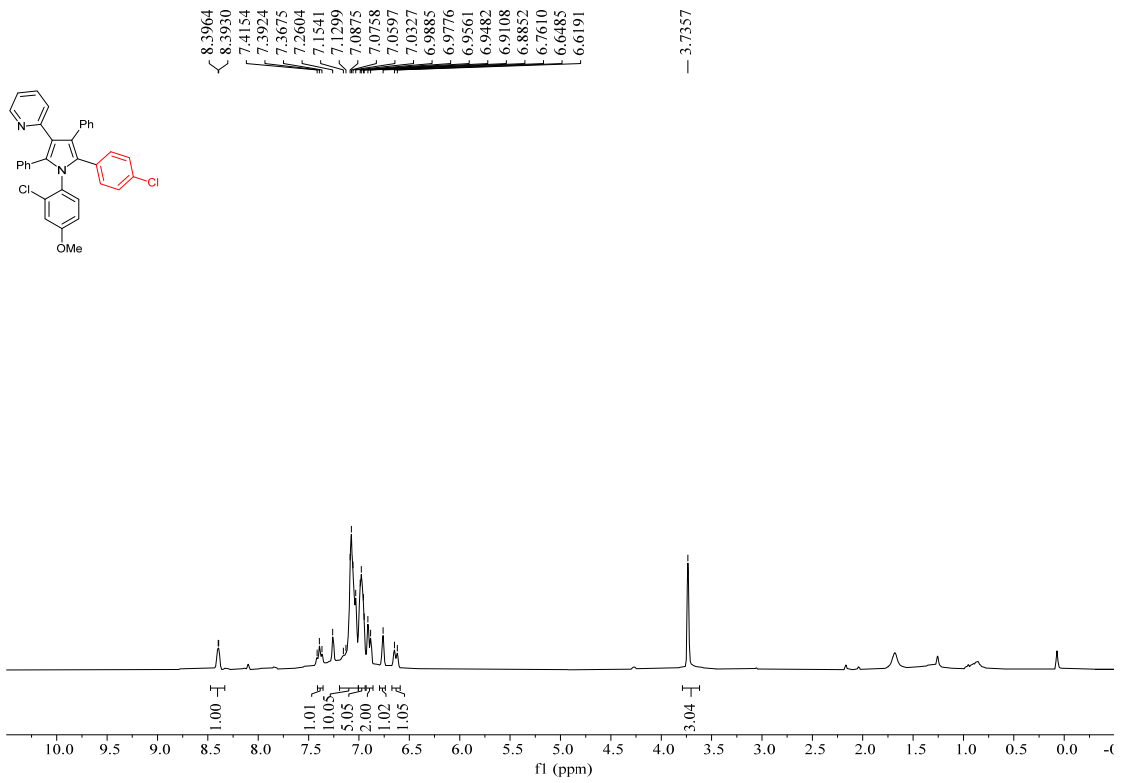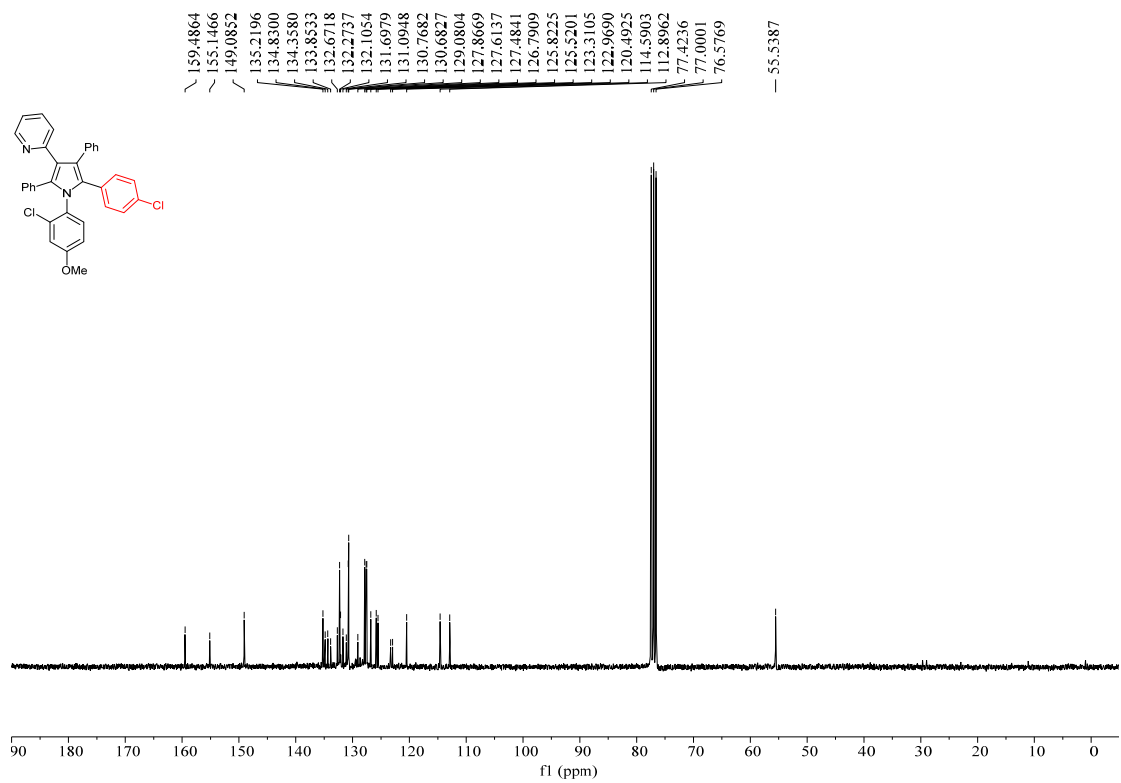

Supplement: d3qo01056b1.pdf [file d3qo01056b1.pdf]
